# Supplementary material
Source: PubMed Central journal article supplement (PMC4645610)
Supplement: supp_M115.664037_jbc.M115.664037-1.pdf [file supp_M115.664037_jbc.M115.664037-1.pdf]

**Supplementary table ST1:** List of cytokines showing differential abundance in GBM sera.

| S. No | Symbol        | Serum cytokine levels by bead array <sup>#</sup> |          |                            |                         | Cytokine expression from TCGA <sup>%</sup> |                     |          |
|-------|---------------|--------------------------------------------------|----------|----------------------------|-------------------------|--------------------------------------------|---------------------|----------|
|       |               | Abundance                                        | p value  | Normal pg/ml<br>(Mean±SEM) | GBM pg/ml<br>(Mean±SEM) | Regulation                                 | Log2 fold<br>change | P value  |
| 1     | IL10          | High                                             | 3.50E-12 | 1.20±0.25                  | 25.30±4.75              | Up                                         | 0.50                | 0.007705 |
| 2     | IL17          | High                                             | 9.91E-11 | 4.79±1.65                  | 68.67±4.80              | Down                                       | -0.35               | 2.44E-05 |
| 3     | IL2           | High                                             | 4.03E-07 | 14.43±11.46                | 30.48±4.80              | Up                                         | 0.29                | 0.013905 |
| 4     | MIP1 $\alpha$ | High                                             | 6.83E-06 | 2.42±1.29                  | 143.36±77.02            | NS                                         | NS                  | NS       |
| 5     | IL15          | High                                             | 2.54E-11 | 0.35±0.13                  | 10.65±2.50              | Up                                         | 1.18                | 2.00E-04 |
| 6     | TNF $\alpha$  | High                                             | 2.32E-05 | 28.82±17.50                | 48.33±9.77              | NS                                         | NS                  | NS       |
| 7     | LIF           | High                                             | 5.03E-06 | 1.00±0.00                  | 12.02±1.37              | Up                                         | 0.71                | 0.003247 |
| 8     | IL6           | High                                             | 1.23E-07 | 6.42±1.46                  | 427.55±168.7            | NS                                         | NS                  | NS       |
| 9     | IL9           | High                                             | 3.98E-06 | 103.68±69.69               | 149.54±51.39            | NS                                         | NS                  | NS       |
| 10    | FGFbasic      | High                                             | 4.04E-05 | 4.69±2.73                  | 15.13±1.47              | Up                                         | 0.73                | 0.001428 |
| 11    | IL4           | High                                             | 4.79E-09 | 1.12±0.32                  | 4.47±0.31               | Up                                         | 0.86                | 2.44E-05 |
| 12    | IFN $\gamma$  | High                                             | 4.73E-08 | 65.93±27.07                | 205.00±31.13            | Up                                         | 0.48                | 0.004681 |
| 13    | GM-CSF        | High                                             | 8.50E-04 | 6.85±1.85                  | 53.41±5.7               | Up                                         | 0.50                | 0.009749 |
| 14    | IL7           | High                                             | 1.26E-08 | 5.69±0.50                  | 21.12±3.86              | Up                                         | 2.39                | 8.00E-06 |
| 15    | IL1R $\alpha$ | High                                             | 1.28E-04 | 122.11±10.72               | 571.57±83.11            | Up                                         | 0.44                | 0.044092 |
| 16    | IL1 $\beta$   | High                                             | 0.011423 | 1.79±0.62                  | 61.94±38.03             | NS                                         | NS                  | NS       |
| 17    | TNF $\beta$   | High                                             | 0.024561 | 2.54±1.00                  | 5.38±0.88               | NS                                         | NS                  | NS       |
| 18    | SCGF $\beta$  | High                                             | 1.01E-06 | 22446±1741                 | 40657±1620              | Up                                         | 0.52                | 0.001428 |
| 19    | GRO $\alpha$  | High                                             | 0.017843 | 81.14±9.07                 | 420.1±109.21            | NS                                         | NS                  | NS       |
| 20    | MIG           | High                                             | 0.003469 | 1213.±403                  | 2137.3±238.3            | Up                                         | 2.22                | 3.40E-05 |
| 21    | IL13          | High                                             | 0.010509 | 4.36±0.72                  | 8.97±1.1                | Down                                       | -0.18               | 0.003917 |

|    |                |      |          |              |              |      |       |          |
|----|----------------|------|----------|--------------|--------------|------|-------|----------|
| 22 | HGF            | High | 6.22E-04 | 576.06±29.33 | 932.44±51.03 | NS   | NS    | NS       |
| 23 | IL2R $\alpha$  | High | 0.016059 | 77.79±5.39   | 123.86±6.84  | Up   | 1.70  | 2.44E-05 |
| 24 | M-CSF          | High | 0.011199 | 20.04±1.70   | 41.54±3.14   | Up   | 0.46  | 2.00E-04 |
| 25 | CTACK          | Low  | 0.025030 | 753.11±28.80 | 666.67±28.91 | Up   | 0.59  | 0.013905 |
| 26 | IP10           | Low  | 2.52E-04 | 1450.2±120.2 | 1092.94±95.5 | Up   | 2.23  | 7.37E-05 |
| 27 | IFN $\alpha$ 2 | Low  | 6.14E-05 | 30.23±1.56   | 19.98±1.21   | NS   | NS    | NS       |
| 28 | TRAIL          | Low  | 6.14E-05 | 58.53±4.37   | 36.96±2.1    | Up   | 1.13  | 0.002218 |
| 29 | SDF1 $\alpha$  | Low  | 0.018249 | 73.18±7.15   | 57.30±5.88   | NS   | NS    | NS       |
| 30 | MIF            | Low  | 1.80E-04 | 2574.3±233.3 | 3184.7±762.2 | NS   | NS    | NS       |
| 31 | eotaxin        | Low  | 2.06E-04 | 195.06±15.49 | 154.25±23.38 | Down | -0.15 | 0.027505 |
| 32 | IL12 (p40)     | Low  | 0.035949 | 61.53±8.55   | 59.56±7.00   | Down | -0.32 | 0.001131 |
| 33 | $\beta$ NGF    | Low  | 1.20E-05 | 1.94±0.19    | 1.03±0.12    | Down | -0.29 | 0.001246 |

#Serum cytokine profiling (n=48 cytokines) was carried out using normal sera (n=26 samples) and GBM sera (n=148 samples) by bead array method. Non-parametric t-test was conducted with FDR correction to identify significant differentially abundant cytokines (n=33 cytokines). The abundance, p value and mean value with standard error for 33 differentially abundant cytokines are provided in the table.

%The TCGA microarray data which is publically available was used to check the transcript levels of 33 differentially regulated cytokines obtained by bead array. Non-parametric t-test was conducted with FDR correction using log 2 ratio of normal brain tissue and GBM tumor tissue to identify significant differentially regulated cytokines at transcript level. The regulation, p value and log 2 fold change are provided in the table. NS refers to non-significant.

**Supplementary table ST2:** List of proteins identified in CHME-3 supernatant treated with U87 CM.

| S. No | Protein AC <sup>a</sup> | Protein names <sup>b</sup>                                                                                                                                                                                                                                      | Gene names | Peptides <sup>c</sup> | Signal peptide <sup>d</sup> | NN-score <sup>e</sup> |
|-------|-------------------------|-----------------------------------------------------------------------------------------------------------------------------------------------------------------------------------------------------------------------------------------------------------------|------------|-----------------------|-----------------------------|-----------------------|
| 1     | P12111                  | Collagen alpha-3(VI) chain                                                                                                                                                                                                                                      | COL6A3     | 126                   | +                           | 0.321                 |
| 2     | Q15149-4                | Plectin                                                                                                                                                                                                                                                         | PLEC       | 99                    | NA                          | NA                    |
| 3     | P01024                  | Complement C3;Complement C3 beta chain;Complement C3 alpha chain;C3a anaphylatoxin;Acylation stimulating protein;Complement C3b alpha chain;Complement C3c alpha chain fragment 1;Complement C3dg fragment;Complement C3g fragment;Complement C3d fragment;Comp | C3         | 95                    | +                           | 0.618                 |
| 4     | P02751                  | Fibronectin;Anastellin;Ugl-Y1;Ugl-Y2;Ugl-Y3                                                                                                                                                                                                                     | FN1        | 95                    | +                           | 0.369                 |
| 5     | P02751-15               | Fibronectin;Anastellin;Ugl-Y1;Ugl-Y2;Ugl-Y3                                                                                                                                                                                                                     | FN1        | 95                    | +                           | 0.364                 |
| 6     | Q14315-2                | Filamin-C                                                                                                                                                                                                                                                       | FLNC       | 87                    | -                           | 0.449                 |
| 7     | P21333-2                | Filamin-A                                                                                                                                                                                                                                                       | FLNA       | 79                    | -                           | 0.442                 |
| 8     | O75369-2                | Filamin-B                                                                                                                                                                                                                                                       | FLNB       | 78                    | -                           | 0.358                 |
| 9     | P35579                  | Myosin-9                                                                                                                                                                                                                                                        | MYH9       | 74                    | -                           | 0.075                 |
| 10    | P24821                  | Tenascin                                                                                                                                                                                                                                                        | TNC        | 65                    | +                           | 0.468                 |
| 11    | Q14204                  | Cytoplasmic dynein 1 heavy chain 1                                                                                                                                                                                                                              | DYNC1H1    | 57                    | NA                          | NA                    |
| 12    | P12814                  | Alpha-actinin-1                                                                                                                                                                                                                                                 | ACTN1      | 56                    | -                           | 0.431                 |
| 13    | O43707                  | Alpha-actinin-4                                                                                                                                                                                                                                                 | ACTN4      | 53                    | -                           | 0.418                 |
| 14    | Q9Y490                  | Talin-1                                                                                                                                                                                                                                                         | TLN1       | 50                    | -                           | 0.233                 |
| 15    | Q13813-3                | Spectrin alpha chain, non-erythrocytic 1                                                                                                                                                                                                                        | SPTAN1     | 45                    | -                           | 0.236                 |
| 16    | Q00610-2                | Clathrin heavy chain 1                                                                                                                                                                                                                                          | CLTC       | 43                    | -                           | 0.439                 |
| 17    | Q99715-4                | Collagen alpha-1(XII) chain                                                                                                                                                                                                                                     | COL12A1    | 42                    | +                           | 0.339                 |
| 18    | P18206-2                | Vinculin                                                                                                                                                                                                                                                        | VCL        | 40                    | -                           | 0.207                 |
| 19    | Q01082                  | Spectrin beta chain, non-erythrocytic 1                                                                                                                                                                                                                         | SPTBN1     | 40                    | -                           | 0.177                 |
| 20    | P53396-2                | ATP-citrate synthase                                                                                                                                                                                                                                            | ACLY       | 38                    | -                           | 0.537                 |
| 21    | P46940                  | Ras GTPase-activating-like protein IQGAP1                                                                                                                                                                                                                       | IQGAP1     | 38                    | -                           | 0.24                  |
| 22    | P08238                  | Heat shock protein HSP 90-beta                                                                                                                                                                                                                                  | HSP90AB1   | 38                    | -                           | 0.204                 |
| 23    | P26038                  | Moesin                                                                                                                                                                                                                                                          | MSN        | 37                    | -                           | 0.53                  |
| 24    | P07900                  | Heat shock protein HSP 90-alpha                                                                                                                                                                                                                                 | HSP90AA1   | 36                    | -                           | 0.173                 |
| 25    | P13639                  | Elongation factor 2                                                                                                                                                                                                                                             | EEF2       | 35                    | -                           | 0.38                  |
| 26    | Q14697                  | Neutral alpha-glucosidase AB                                                                                                                                                                                                                                    | GANAB      | 33                    | +                           | 0.64                  |
| 27    | Q02809                  | Procollagen-lysine,2-oxoglutarate 5-dioxygenase 1                                                                                                                                                                                                               | PLOD1      | 33                    | +                           | 0.573                 |
| 28    | P08253                  | 72 kDa type IV collagenase;PEX                                                                                                                                                                                                                                  | MMP2       | 33                    | +                           | 0.514                 |
| 29    | Q02388-2                | Collagen alpha-1(VII) chain                                                                                                                                                                                                                                     | COL7A1     | 33                    | +                           | 0.082                 |
| 30    | P14618-2                | Pyruvate kinase PKM;Pyruvate kinase                                                                                                                                                                                                                             | PKM;PKM2   | 32                    | -                           | 0.436                 |
| 31    | P14618                  | Pyruvate kinase PKM                                                                                                                                                                                                                                             | PKM        | 32                    | -                           | 0.42                  |

|    |          |                                                                                                                                                                                                                                                                  |              |    |    |       |
|----|----------|------------------------------------------------------------------------------------------------------------------------------------------------------------------------------------------------------------------------------------------------------------------|--------------|----|----|-------|
| 32 | P11021   | 78 kDa glucose-regulated protein                                                                                                                                                                                                                                 | HSPA5        | 31 | +  | 0.745 |
| 33 | P11142   | Heat shock cognate 71 kDa protein                                                                                                                                                                                                                                | HSPA8        | 31 | -  | 0.229 |
| 34 | Q07954   | Pro-low-density lipoprotein receptor-related protein 1;Low-density lipoprotein receptor-related protein 1 85 kDa subunit;Low-density lipoprotein receptor-related protein 1 515 kDa subunit;Low-density lipoprotein receptor-related protein 1 intracellular dom | LRP1         | 31 | NA | NA    |
| 35 | P29401   | Transketolase                                                                                                                                                                                                                                                    | TKT          | 30 | -  | 0.315 |
| 36 | P13667   | Protein disulfide-isomerase A4                                                                                                                                                                                                                                   | PDIA4        | 29 | +  | 0.543 |
| 37 | P14625   | Endoplasmic reticulum chaperone                                                                                                                                                                                                                                  | HSP90B1      | 29 | +  | 0.495 |
| 38 | Q15582   | Transforming growth factor-beta-induced protein ig-h3                                                                                                                                                                                                            | TGFBI        | 29 | +  | 0.454 |
| 39 | P02545   | Prelamin-A/C;Lamin-A/C                                                                                                                                                                                                                                           | LMNA         | 29 | -  | 0.077 |
| 40 | Q9NYU2-2 | UDP-glucose:glycoprotein glucosyltransferase 1                                                                                                                                                                                                                   | UGGT1        | 28 | +  | 0.624 |
| 41 | P07942   | Laminin subunit beta-1                                                                                                                                                                                                                                           | LAMB1        | 28 | +  | 0.352 |
| 42 | P11047   | Laminin subunit gamma-1                                                                                                                                                                                                                                          | LAMC1        | 28 | +  | 0.284 |
| 43 | P07237   | Protein disulfide-isomerase                                                                                                                                                                                                                                      | P4HB         | 27 | +  | 0.679 |
| 44 | O00469-2 | Procollagen-lysine,2-oxoglutarate 5-dioxygenase 2                                                                                                                                                                                                                | PLOD2        | 27 | +  | 0.626 |
| 45 | P08670   | Vimentin                                                                                                                                                                                                                                                         | VIM          | 27 | -  | 0.512 |
| 46 | Q16531   | DNA damage-binding protein 1                                                                                                                                                                                                                                     | DDB1         | 26 | -  | 0.554 |
| 47 | P00338   | L-lactate dehydrogenase A chain                                                                                                                                                                                                                                  | LDHA         | 25 | -  | 0.549 |
| 48 | E9PLK3   | Puromycin-sensitive aminopeptidase                                                                                                                                                                                                                               | NPEPPS       | 25 | -  | 0.46  |
| 49 | P21399   | Cytoplasmic aconitate hydratase                                                                                                                                                                                                                                  | ACO1;IRP1    | 25 | -  | 0.404 |
| 50 | P00558   | Phosphoglycerate kinase 1;Phosphoglycerate kinase                                                                                                                                                                                                                | PGK1         | 25 | -  | 0.389 |
| 51 | P43490   | Nicotinamide phosphoribosyltransferase                                                                                                                                                                                                                           | NAMPT;NAMPTL | 25 | -  | 0.302 |
| 52 | P08107   | Heat shock 70 kDa protein 1A/1B                                                                                                                                                                                                                                  | HSPA1A       | 25 | -  | 0.28  |
| 53 | P05121   | Plasminogen activator inhibitor 1                                                                                                                                                                                                                                | SERPINE1     | 24 | +  | 0.644 |
| 54 | P15311   | Ezrin                                                                                                                                                                                                                                                            | EZR          | 24 | -  | 0.563 |
| 55 | P06744   | Glucose-6-phosphate isomerase                                                                                                                                                                                                                                    | GPI          | 24 | -  | 0.453 |
| 56 | B7Z6M1   | Plastin-3                                                                                                                                                                                                                                                        | PLS3         | 24 | -  | 0.399 |
| 57 | P04075   | Fructose-bisphosphate aldolase A;Fructose-bisphosphate aldolase                                                                                                                                                                                                  | ALDOA        | 24 | -  | 0.356 |
| 58 | P12109   | Collagen alpha-1(VI) chain                                                                                                                                                                                                                                       | COL6A1       | 24 | +  | 0.234 |
| 59 | P34932   | Heat shock 70 kDa protein 4                                                                                                                                                                                                                                      | HSPA4        | 24 | -  | 0.226 |
| 60 | O00391   | Sulfhydryl oxidase 1                                                                                                                                                                                                                                             | QSOX1        | 23 | +  | 0.611 |
| 61 | P06733   | Alpha-enolase                                                                                                                                                                                                                                                    | ENO1         | 23 | -  | 0.536 |
| 62 | P06737-2 | Glycogen phosphorylase, liver form;Phosphorylase                                                                                                                                                                                                                 | PYGL         | 23 | -  | 0.382 |
| 63 | P12956   | X-ray repair cross-complementing protein 6                                                                                                                                                                                                                       | XRCC6        | 23 | -  | 0.372 |
| 64 | P35241   | Radixin                                                                                                                                                                                                                                                          | RDX          | 23 | -  | 0.31  |
| 65 | P55072   | Transitional endoplasmic reticulum ATPase                                                                                                                                                                                                                        | VCP          | 23 | -  | 0.163 |

|    |          |                                                                                                                                                                                                                                                                                                                                            |        |    |    |       |
|----|----------|--------------------------------------------------------------------------------------------------------------------------------------------------------------------------------------------------------------------------------------------------------------------------------------------------------------------------------------------|--------|----|----|-------|
| 66 | O00410   | Importin-5                                                                                                                                                                                                                                                                                                                                 | IPO5   | 22 | -  | 0.627 |
| 67 | O60568   | Procollagen-lysine,2-oxoglutarate 5-dioxygenase 3                                                                                                                                                                                                                                                                                          | PLOD3  | 22 | +  | 0.561 |
| 68 | P50990   | T-complex protein 1 subunit theta                                                                                                                                                                                                                                                                                                          | CCT8   | 22 | -  | 0.508 |
| 69 | P50395   | Rab GDP dissociation inhibitor beta                                                                                                                                                                                                                                                                                                        | GDI2   | 22 | -  | 0.315 |
| 70 | O15230   | Laminin subunit alpha-5                                                                                                                                                                                                                                                                                                                    | LAMA5  | 22 | Na | Na    |
| 71 | Q14974   | Importin subunit beta-1                                                                                                                                                                                                                                                                                                                    | KPNB1  | 21 | -  | 0.588 |
| 72 | P08254   | Stromelysin-1                                                                                                                                                                                                                                                                                                                              | MMP3   | 21 | +  | 0.568 |
| 73 | P31939   | Bifunctional purine biosynthesis protein PURH;<br>Phosphoribosylaminoimidazolecarboxamide formyltransferase;IMP<br>cyclohydrolase                                                                                                                                                                                                          | ATIC   | 21 | -  | 0.476 |
| 74 | G3V0E5   | Transferrin receptor protein 1;Transferrin receptor protein 1, serum form                                                                                                                                                                                                                                                                  | TFRC   | 21 | -  | 0.425 |
| 75 | P55060-3 | Exportin-2                                                                                                                                                                                                                                                                                                                                 | CSE1L  | 21 | -  | 0.42  |
| 76 | P78527   | DNA-dependent protein kinase catalytic subunit                                                                                                                                                                                                                                                                                             | PRKDC  | 21 | NA | NA    |
| 77 | Q16706   | Alpha-mannosidase 2                                                                                                                                                                                                                                                                                                                        | MAN2A1 | 20 | +  | 0.661 |
| 78 | Q9NZ08   | Endoplasmic reticulum aminopeptidase 1                                                                                                                                                                                                                                                                                                     | ERAP1  | 20 | +  | 0.609 |
| 79 | O75326   | Semaphorin-7A                                                                                                                                                                                                                                                                                                                              | SEMA7A | 20 | +  | 0.484 |
| 80 | Q86VP6   | Cullin-associated NEDD8-dissociated protein 1                                                                                                                                                                                                                                                                                              | CAND1  | 20 | -  | 0.417 |
| 81 | P49327   | Fatty acid synthase;[Acyl-carrier-protein] S-acetyltransferase;[Acyl-carrier-protein]<br>S-malonyltransferase;3-oxoacyl-[acyl-carrier-protein] synthase;3-oxoacyl-[acyl-<br>carrier-protein] reductase;3-hydroxyacyl-[acyl-carrier-protein] dehydratase;Enoyl-<br>[acyl-carrier-protein] reductase;Oleoyl-[acyl-carrier-protein] hydrolase | FASN   | 20 | -  | 0.408 |
| 82 | P28838-2 | Cytosol aminopeptidase                                                                                                                                                                                                                                                                                                                     | LAP3   | 20 | -  | 0.396 |
| 83 | P15121   | Aldose reductase                                                                                                                                                                                                                                                                                                                           | AKR1B1 | 20 | -  | 0.395 |
| 84 | P06396-2 | Gelsolin                                                                                                                                                                                                                                                                                                                                   | GSN    | 20 | -  | 0.393 |
| 85 | P19338   | Nucleolin                                                                                                                                                                                                                                                                                                                                  | NCL    | 20 | -  | 0.386 |
| 86 | P19367-4 | Hexokinase-1                                                                                                                                                                                                                                                                                                                               | HK1    | 20 | -  | 0.375 |
| 87 | P03956   | Interstitial collagenase;22 kDa interstitial collagenase;27 kDa interstitial<br>collagenase                                                                                                                                                                                                                                                | MMP1   | 19 | +  | 0.637 |
| 88 | P22314   | Ubiquitin-like modifier-activating enzyme 1                                                                                                                                                                                                                                                                                                | UBA1   | 19 | -  | 0.53  |
| 89 | O75083   | WD repeat-containing protein 1                                                                                                                                                                                                                                                                                                             | WDR1   | 19 | -  | 0.518 |
| 90 | E9PIR7   | Thioredoxin reductase 1, cytoplasmic                                                                                                                                                                                                                                                                                                       | TXNRD1 | 19 | -  | 0.426 |
| 91 | Q16555-2 | Dihydropyrimidinase-related protein 2                                                                                                                                                                                                                                                                                                      | DPYSL2 | 19 | -  | 0.425 |
| 92 | P08581   | Hepatocyte growth factor receptor                                                                                                                                                                                                                                                                                                          | MET    | 19 | +  | 0.374 |
| 93 | Q14764   | Major vault protein                                                                                                                                                                                                                                                                                                                        | MVP    | 19 | -  | 0.341 |
| 94 | Q02818   | Nucleobindin-1                                                                                                                                                                                                                                                                                                                             | NUCB1  | 19 | +  | 0.305 |
| 95 | P10809   | 60 kDa heat shock protein, mitochondrial                                                                                                                                                                                                                                                                                                   | HSPD1  | 19 | -  | 0.289 |

|     |          |                                                                   |                   |    |   |       |
|-----|----------|-------------------------------------------------------------------|-------------------|----|---|-------|
| 96  | O43852   | Calumenin                                                         | CALU              | 18 | + | 0.753 |
| 97  | Q08380   | Galectin-3-binding protein                                        | LGALS3BP          | 18 | + | 0.738 |
| 98  | P60842   | Eukaryotic initiation factor 4A-I                                 | EIF4A1            | 18 | - | 0.631 |
| 99  | P35442   | Thrombospondin-2                                                  | THBS2             | 18 | + | 0.526 |
| 100 | O60462-4 | Neuropilin-2                                                      | NRP2              | 18 | + | 0.518 |
| 101 | O15067   | Phosphoribosylformylglycinamide synthase                          | PFAS              | 18 | - | 0.488 |
| 102 | P60174-1 | Triosephosphate isomerase                                         | TPI1              | 18 | - | 0.39  |
| 103 | Q7KZF4   | Staphylococcal nuclease domain-containing protein 1               | SND1              | 18 | - | 0.302 |
| 104 | P36222   | Chitinase-3-like protein 1                                        | CHI3L1            | 17 | + | 0.645 |
| 105 | Q6UVK1   | Chondroitin sulfate proteoglycan 4                                | CSPG4             | 17 | + | 0.584 |
| 106 | P68371   | Tubulin beta-4B chain;Tubulin beta-4A chain                       | TUBB4B;<br>TUBB4A | 17 | - | 0.501 |
| 107 | Q5JP53   | Tubulin beta chain                                                | TUBB              | 17 | - | 0.497 |
| 108 | P09960   | Leukotriene A-4 hydrolase                                         | LTA4H             | 17 | - | 0.485 |
| 109 | P48637   | Glutathione synthetase                                            | GSS               | 17 | - | 0.484 |
| 110 | Q04446   | 1,4-alpha-glucan-branching enzyme                                 | GBE1              | 17 | - | 0.455 |
| 111 | P11413   | Glucose-6-phosphate 1-dehydrogenase                               | G6PD              | 17 | - | 0.449 |
| 112 | Q10567-3 | AP-1 complex subunit beta-1                                       | AP1B1             | 17 | - | 0.447 |
| 113 | Q16719   | Kynureninase                                                      | KYNU              | 17 | - | 0.426 |
| 114 | B4E3Q1   | Calsyntenin-1;Soluble Alc-alpha;CTF1-alpha                        | CLSTN1            | 17 | + | 0.425 |
| 115 | P36871   | Phosphoglucomutase-1                                              | PGM1              | 17 | - | 0.417 |
| 116 | P18669   | Phosphoglycerate mutase 1                                         | PGAM1             | 17 | - | 0.407 |
| 117 | P14314-2 | Glucosidase 2 subunit beta                                        | PRKCSH            | 17 | + | 0.338 |
| 118 | P62258   | 14-3-3 protein epsilon                                            | YWHAE             | 17 | - | 0.33  |
| 119 | P12110   | Collagen alpha-2(VI) chain                                        | COL6A2            | 17 | + | 0.214 |
| 120 | P07355   | Annexin A2;Annexin;Putative annexin A2-like protein               | ANXA2;ANXA2P2     | 16 | - | 0.746 |
| 121 | K7EJT8   | AP-2 complex subunit beta                                         | AP2B1             | 16 | - | 0.702 |
| 122 | P07195   | L-lactate dehydrogenase B chain;L-lactate dehydrogenase           | LDHB              | 16 | - | 0.569 |
| 123 | P23526   | Adenosylhomocysteinase                                            | AHCY              | 16 | - | 0.507 |
| 124 | P63261   | Actin, cytoplasmic 2;Actin, cytoplasmic 2, N-terminally processed | ACTG1;ACTA1       | 16 | - | 0.505 |
| 125 | P40227   | T-complex protein 1 subunit zeta                                  | CCT6A             | 16 | - | 0.49  |
| 126 | Q9BQE3   | Tubulin alpha-1C chain                                            | TUBA1C;TUBA1B     | 16 | - | 0.481 |
| 127 | P78371   | T-complex protein 1 subunit beta                                  | CCT2              | 16 | - | 0.446 |
| 128 | P54136   | Arginine--tRNA ligase, cytoplasmic                                | RARS              | 16 | - | 0.43  |
| 129 | P31150   | Rab GDP dissociation inhibitor alpha                              | GDI1              | 16 | - | 0.429 |
| 130 | Q9H4M9   | EH domain-containing protein 1                                    | EHD1              | 16 | - | 0.319 |
| 131 | P11717   | Cation-independent mannose-6-phosphate receptor                   | IGF2R             | 16 | + | 0.29  |

|     |          |                                                                                                                    |                             |    |   |       |
|-----|----------|--------------------------------------------------------------------------------------------------------------------|-----------------------------|----|---|-------|
| 132 | P49589-2 | Cysteine--tRNA ligase, cytoplasmic                                                                                 | CARS                        | 16 | - | 0.179 |
| 133 | Q24JP5   | Transmembrane protein 132A                                                                                         | TMEM132A                    | 16 | + | 0.164 |
| 134 | Q9UI42-2 | Carboxypeptidase A4                                                                                                | CPA4                        | 15 | + | 0.767 |
| 135 | P07093-2 | Glia-derived nexin                                                                                                 | SERPINE2                    | 15 | + | 0.68  |
| 136 | Q9P2B2   | Prostaglandin F2 receptor negative regulator                                                                       | PTGFRN                      | 15 | + | 0.62  |
| 137 | Q6YHK3   | CD109 antigen                                                                                                      | CD109                       | 15 | + | 0.6   |
| 138 | P17987   | T-complex protein 1 subunit alpha                                                                                  | TCP1                        | 15 | - | 0.518 |
| 139 | G3V1R5   | Nardilysin                                                                                                         | NRD1                        | 15 | - | 0.475 |
| 140 | P68363   | Tubulin alpha-1B chain;Tubulin alpha-1A chain;Tubulin alpha-3C/D chain;Tubulin alpha-3E chain                      | TUBA1B;TUBA1A;TUBA3C;TUBA3E | 15 | - | 0.472 |
| 141 | P13010   | X-ray repair cross-complementing protein 5                                                                         | XRCC5                       | 15 | - | 0.447 |
| 142 | P35237   | Serpin B6                                                                                                          | SERPINB6                    | 15 | - | 0.44  |
| 143 | B4DQJ8   | 6-phosphogluconate dehydrogenase, decarboxylating                                                                  | PGD                         | 15 | - | 0.43  |
| 144 | Q9Y262   | Eukaryotic translation initiation factor 3 subunit L                                                               | EIF3L                       | 15 | - | 0.383 |
| 145 | Q86Y38   | Xylosyltransferase 1                                                                                               | XYLT1                       | 15 | + | 0.381 |
| 146 | P30041   | Peroxiredoxin-6                                                                                                    | PRDX6                       | 15 | - | 0.378 |
| 147 | O15144   | Actin-related protein 2/3 complex subunit 2                                                                        | ARPC2                       | 15 | - | 0.36  |
| 148 | Q9Y230   | RuvB-like 2                                                                                                        | RUVBL2                      | 15 | - | 0.344 |
| 149 | P26639   | Threonine--tRNA ligase, cytoplasmic                                                                                | TARS                        | 15 | - | 0.337 |
| 150 | P08123   | Collagen alpha-2(I) chain                                                                                          | COL1A2                      | 15 | + | 0.337 |
| 151 | P53621   | Coatomer subunit alpha;Xenin;Proxenin                                                                              | COPA                        | 15 | - | 0.331 |
| 152 | P38646   | Stress-70 protein, mitochondrial                                                                                   | HSPA9                       | 15 | - | 0.28  |
| 153 | O75643   | U5 small nuclear ribonucleoprotein 200 kDa helicase                                                                | SNRNP200                    | 15 | - | 0.268 |
| 154 | P02452   | Collagen alpha-1(I) chain                                                                                          | COL1A1                      | 15 | + | 0.206 |
| 155 | P12081-4 | Histidine--tRNA ligase, cytoplasmic                                                                                | HARS                        | 15 | - | 0.182 |
| 156 | Q12906-5 | Interleukin enhancer-binding factor 3                                                                              | ILF3                        | 15 | - | 0.066 |
| 157 | P07686   | Beta-hexosaminidase subunit beta;Beta-hexosaminidase subunit beta chain B;Beta-hexosaminidase subunit beta chain A | HEXB                        | 14 | + | 0.712 |
| 158 | P55058   | Phospholipid transfer protein                                                                                      | PLTP                        | 14 | + | 0.7   |
| 159 | O14786-3 | Neuropilin-1                                                                                                       | NRP1                        | 14 | + | 0.678 |
| 160 | E7EW34   | 26S proteasome non-ATPase regulatory subunit 2                                                                     | PSMD2                       | 14 | - | 0.672 |
| 161 | Q15393   | Splicing factor 3B subunit 3                                                                                       | SF3B3                       | 14 | - | 0.645 |
| 162 | P14543-2 | Nidogen-1                                                                                                          | NID1                        | 14 | + | 0.613 |
| 163 | O14980   | Exportin-1                                                                                                         | XPO1                        | 14 | - | 0.604 |
| 164 | P09104   | Gamma-enolase;Enolase                                                                                              | ENO2                        | 14 | - | 0.599 |
| 165 | P06576   | ATP synthase subunit beta, mitochondrial;ATP synthase subunit beta                                                 | ATP5B                       | 14 | - | 0.591 |
| 166 | Q6P179-3 | Endoplasmic reticulum aminopeptidase 2                                                                             | ERAP2                       | 14 | - | 0.578 |

|     |          |                                                                                                                                                      |                    |    |   |       |
|-----|----------|------------------------------------------------------------------------------------------------------------------------------------------------------|--------------------|----|---|-------|
| 167 | P30153   | Serine/threonine-protein phosphatase 2A 65 kDa regulatory subunit A alpha isoform                                                                    | PPP2R1A            | 14 | - | 0.562 |
| 168 | Q9H4A4   | Aminopeptidase B                                                                                                                                     | RNPEP              | 14 | - | 0.554 |
| 169 | P08758   | Annexin A5;Annexin                                                                                                                                   | ANXA5              | 14 | - | 0.55  |
| 170 | P05120   | Plasminogen activator inhibitor 2                                                                                                                    | SERPINB2           | 14 | - | 0.536 |
| 171 | B4DZI8   | Coatomer subunit beta                                                                                                                                | COPB2              | 14 | - | 0.489 |
| 172 | J3KN67   | Tropomyosin alpha-3 chain                                                                                                                            | TPM3               | 14 | - | 0.486 |
| 173 | P04406   | Glyceraldehyde-3-phosphate dehydrogenase                                                                                                             | GAPDH              | 14 | - | 0.467 |
| 174 | P17174   | Aspartate aminotransferase, cytoplasmic;Aspartate aminotransferase                                                                                   | GOT1               | 14 | - | 0.439 |
| 175 | P78417   | Glutathione S-transferase omega-1                                                                                                                    | GSTO1              | 14 | - | 0.435 |
| 176 | Q01518   | Adenylyl cyclase-associated protein 1                                                                                                                | CAP1               | 14 | - | 0.429 |
| 177 | P67936   | Tropomyosin alpha-4 chain                                                                                                                            | TPM4               | 14 | - | 0.417 |
| 178 | Q16363-2 | Laminin subunit alpha-4                                                                                                                              | LAMA4              | 14 | + | 0.397 |
| 179 | Q9NY33-4 | Dipeptidyl peptidase 3                                                                                                                               | DPP3               | 14 | - | 0.392 |
| 180 | P22392-2 | Nucleoside diphosphate kinase B;Nucleoside diphosphate kinase                                                                                        | NME2;<br>NME1-NME2 | 14 | - | 0.373 |
| 181 | P27797   | Calreticulin                                                                                                                                         | CALR               | 14 | + | 0.366 |
| 182 | Q5VU59   | Tropomyosin alpha-3 chain                                                                                                                            | TPM3               | 14 | - | 0.365 |
| 183 | P26641   | Elongation factor 1-gamma                                                                                                                            | EEF1G              | 14 | - | 0.353 |
| 184 | F5H335   | Eukaryotic translation initiation factor 3 subunit A                                                                                                 | EIF3A              | 14 | - | 0.337 |
| 185 | P08133   | Annexin A6;Annexin                                                                                                                                   | ANXA6              | 14 | - | 0.334 |
| 186 | G3V1S6   | Polypeptide N-acetylgalactosaminyltransferase 2;Polypeptide N-acetylgalactosaminyltransferase 2 soluble form                                         | GALNT2             | 14 | - | 0.316 |
| 187 | P09874   | Poly [ADP-ribose] polymerase 1                                                                                                                       | PARP1              | 14 | - | 0.112 |
| 188 | P26022   | Pentraxin-related protein PTX3                                                                                                                       | PTX3               | 13 | + | 0.755 |
| 189 | P09871   | Complement C1s subcomponent;Complement C1s subcomponent heavy chain;Complement C1s subcomponent light chain                                          | C1S                | 13 | + | 0.73  |
| 190 | Q16610   | Extracellular matrix protein 1                                                                                                                       | ECM1               | 13 | + | 0.711 |
| 191 | Q9Y4K0   | Lysyl oxidase homolog 2                                                                                                                              | LOXL2              | 13 | + | 0.711 |
| 192 | Q93063   | Exostosin-2                                                                                                                                          | EXT2               | 13 | - | 0.705 |
| 193 | Q15113   | Procollagen C-endopeptidase enhancer 1                                                                                                               | PCOLCE             | 13 | + | 0.699 |
| 194 | P00491   | Purine nucleoside phosphorylase                                                                                                                      | PNP                | 13 | - | 0.509 |
| 195 | A8MUB1   | Tubulin alpha-4A chain;Tubulin alpha-8 chain                                                                                                         | TUBA4A;TUBA8       | 13 | - | 0.501 |
| 196 | P19021-4 | Peptidyl-glycine alpha-amidating monooxygenase;Peptidylglycine alpha-hydroxylating monooxygenase;Peptidyl-alpha-hydroxyglycine alpha-amidating lyase | PAM                | 13 | + | 0.463 |
| 197 | J3KR24   | Isoleucine--tRNA ligase, cytoplasmic                                                                                                                 | IARS               | 13 | - | 0.461 |



|     |          |                                                                                                                                                                                                                                                                 |          |    |   |       |
|-----|----------|-----------------------------------------------------------------------------------------------------------------------------------------------------------------------------------------------------------------------------------------------------------------|----------|----|---|-------|
| 198 | P08195-2 | 4F2 cell-surface antigen heavy chain                                                                                                                                                                                                                            | SLC3A2   | 13 | - | 0.451 |
| 199 | P26006   | Integrin alpha-3;Integrin alpha-3 heavy chain;Integrin alpha-3 light chain                                                                                                                                                                                      | ITGA3    | 13 | + | 0.446 |
| 200 | P42224   | Signal transducer and activator of transcription 1-alpha/beta                                                                                                                                                                                                   | STAT1    | 13 | - | 0.433 |
| 201 | P11216   | Glycogen phosphorylase, brain form                                                                                                                                                                                                                              | PYGB     | 13 | - | 0.422 |
| 202 | E7ENZ3   | T-complex protein 1 subunit epsilon                                                                                                                                                                                                                             | CCT5     | 13 | - | 0.404 |
| 203 | J3KNT0   | Fascin                                                                                                                                                                                                                                                          | FSCN1    | 13 | - | 0.395 |
| 204 | P37837   | Transaldolase                                                                                                                                                                                                                                                   | TALDO1   | 13 | - | 0.394 |
| 205 | Q92626   | Peroxidasin homolog                                                                                                                                                                                                                                             | PXDN     | 13 | + | 0.385 |
| 206 | Q01813   | 6-phosphofructokinase type C                                                                                                                                                                                                                                    | PFKP     | 13 | - | 0.369 |
| 207 | O95782-2 | AP-2 complex subunit alpha-1                                                                                                                                                                                                                                    | AP2A1    | 13 | - | 0.365 |
| 208 | Q99832-3 | T-complex protein 1 subunit eta                                                                                                                                                                                                                                 | CCT7     | 13 | - | 0.354 |
| 209 | Q92598-2 | Heat shock protein 105 kDa                                                                                                                                                                                                                                      | HSPH1    | 13 | - | 0.329 |
| 210 | P63104   | 14-3-3 protein zeta/delta                                                                                                                                                                                                                                       | YWHAZ    | 13 | - | 0.252 |
| 211 | Q9UQ80   | Proliferation-associated protein 2G4                                                                                                                                                                                                                            | PA2G4    | 13 | - | 0.201 |
| 212 | Q15293   | Reticulocalbin-1                                                                                                                                                                                                                                                | RCN1     | 12 | + | 0.851 |
| 213 | Q13162   | Peroxiredoxin-4                                                                                                                                                                                                                                                 | PRDX4    | 12 | + | 0.724 |
| 214 | P00736   | Complement C1r subcomponent;Complement C1r subcomponent heavy chain;Complement C1r subcomponent light chain                                                                                                                                                     | C1R      | 12 | + | 0.697 |
| 215 | B4DXW1   | Actin-related protein 3                                                                                                                                                                                                                                         | ACTR3    | 12 | - | 0.621 |
| 216 | Q9ULV4   | Coronin-1C;Coronin                                                                                                                                                                                                                                              | CORO1C   | 12 | - | 0.584 |
| 217 | B1AK87   | F-actin-capping protein subunit beta                                                                                                                                                                                                                            | CAPZB    | 12 | - | 0.567 |
| 218 | F5H365   | Protein transport protein Sec23A                                                                                                                                                                                                                                | SEC23A   | 12 | - | 0.562 |
| 219 | P32004-3 | Neural cell adhesion molecule L1                                                                                                                                                                                                                                | L1CAM    | 12 | + | 0.561 |
| 220 | P50991   | T-complex protein 1 subunit delta                                                                                                                                                                                                                               | CCT4     | 12 | - | 0.535 |
| 221 | P60228   | Eukaryotic translation initiation factor 3 subunit E                                                                                                                                                                                                            | EIF3E    | 12 | - | 0.5   |
| 222 | Q14240   | Eukaryotic initiation factor 4A-II                                                                                                                                                                                                                              | EIF4A2   | 12 | - | 0.494 |
| 223 | P49368   | T-complex protein 1 subunit gamma                                                                                                                                                                                                                               | CCT3     | 12 | - | 0.49  |
| 224 | O75635-2 | Serpin B7                                                                                                                                                                                                                                                       | SERPINB7 | 12 | - | 0.451 |
| 225 | Q9Y266   | Nuclear migration protein nudC                                                                                                                                                                                                                                  | NUDC     | 12 | - | 0.448 |
| 226 | Q9NTK5   | Obg-like ATPase 1                                                                                                                                                                                                                                               | OLA1     | 12 | - | 0.442 |
| 227 | P33908   | Mannosyl-oligosaccharide 1,2-alpha-mannosidase IA                                                                                                                                                                                                               | MAN1A1   | 12 | + | 0.437 |
| 228 | E9PG40   | Amyloid beta A4 protein;N-APP;Soluble APP-alpha;Soluble APP-beta;C99;Beta-amyloid protein 42;Beta-amyloid protein 40;C83;P3(42);P3(40);C80;Gamma-secretase C-terminal fragment 59;Gamma-secretase C-terminal fragment 57;Gamma-secretase C-terminal fragment 50 | APP      | 12 | + | 0.419 |
| 229 | Q6IBS0   | Twinfilin-2                                                                                                                                                                                                                                                     | TWF2     | 12 | - | 0.418 |

|     |          |                                                                                                                           |                         |    |   |       |
|-----|----------|---------------------------------------------------------------------------------------------------------------------------|-------------------------|----|---|-------|
| 230 | Q9Y265   | RuvB-like 1                                                                                                               | RUVBL1                  | 12 | - | 0.402 |
| 231 | Q9Y617   | Phosphoserine aminotransferase                                                                                            | PSAT1                   | 12 | - | 0.384 |
| 232 | Q15008   | 26S proteasome non-ATPase regulatory subunit 6                                                                            | PSMD6                   | 12 | - | 0.363 |
| 233 | P31948   | Stress-induced-phosphoprotein 1                                                                                           | STIP1                   | 12 | - | 0.344 |
| 234 | Q96QK1   | Vacuolar protein sorting-associated protein 35                                                                            | VPS35                   | 12 | - | 0.331 |
| 235 | P11940-2 | Polyadenylate-binding protein 1;Polyadenylate-binding protein 3                                                           | PABPC1;PABPC3           | 12 | - | 0.319 |
| 236 | Q13219   | Pappalysin-1                                                                                                              | PAPPA                   | 12 | + | 0.316 |
| 237 | Q02790   | Peptidyl-prolyl cis-trans isomerase FKBP4;Peptidyl-prolyl cis-trans isomerase FKBP4, N-terminally processed               | FKBP4                   | 12 | - | 0.287 |
| 238 | Q12905   | Interleukin enhancer-binding factor 2                                                                                     | ILF2                    | 12 | - | 0.272 |
| 239 | Q08211   | ATP-dependent RNA helicase A                                                                                              | DHX9                    | 12 | - | 0.27  |
| 240 | P55884   | Eukaryotic translation initiation factor 3 subunit B                                                                      | EIF3B                   | 12 | - | 0.263 |
| 241 | Q9Y6N7-6 | Roundabout homolog 1                                                                                                      | ROBO1                   | 12 | + | 0.245 |
| 242 | P22626-2 | Heterogeneous nuclear ribonucleoproteins A2/B1                                                                            | HNRNPA2B1               | 12 | - | 0.099 |
| 243 | P46821   | Microtubule-associated protein 1B;MAP1B heavy chain;MAP1 light chain LC1                                                  | MAP1B                   | 12 | - | 0.088 |
| 244 | P01009   | Alpha-1-antitrypsin;Short peptide from AAT                                                                                | SERPINA1                | 11 | + | 0.852 |
| 245 | P37802   | Transgelin-2                                                                                                              | TAGLN2                  | 11 | - | 0.784 |
| 246 | H3BS10   | Beta-hexosaminidase;Beta-hexosaminidase subunit alpha                                                                     | HEXA                    | 11 | + | 0.693 |
| 247 | P09493-3 | Tropomyosin alpha-1 chain                                                                                                 | TPM1                    | 11 | - | 0.659 |
| 248 | P40926   | Malate dehydrogenase, mitochondrial;Malate dehydrogenase                                                                  | MDH2                    | 11 | - | 0.644 |
| 249 | P16152   | Carbonyl reductase [NADPH] 1                                                                                              | CBR1                    | 11 | - | 0.633 |
| 250 | Q92820   | Gamma-glutamyl hydrolase                                                                                                  | GGH                     | 11 | + | 0.628 |
| 251 | Q9BRK5   | 45 kDa calcium-binding protein                                                                                            | SDF4                    | 11 | + | 0.591 |
| 252 | P09936   | Ubiquitin carboxyl-terminal hydrolase isozyme L1                                                                          | UCHL1                   | 11 | - | 0.53  |
| 253 | Q06830   | Peroxiredoxin-1                                                                                                           | PRDX1                   | 11 | - | 0.528 |
| 254 | O95394   | Phosphoacetylglucosamine mutase                                                                                           | PGM3                    | 11 | - | 0.512 |
| 255 | P68133   | Actin, alpha skeletal muscle;Actin, alpha cardiac muscle 1;Actin, gamma-enteric smooth muscle;Actin, aortic smooth muscle | ACTA1;ACTC1;ACTG2;ACTA2 | 11 | - | 0.504 |
| 256 | Q15782-6 | Chitinase-3-like protein 2                                                                                                | CHI3L2                  | 11 | - | 0.49  |
| 257 | P05556   | Integrin beta-1                                                                                                           | ITGB1                   | 11 | + | 0.474 |
| 258 | P40925   | Malate dehydrogenase, cytoplasmic                                                                                         | MDH1                    | 11 | - | 0.455 |
| 259 | Q96G03   | Phosphoglucomutase-2                                                                                                      | PGM2                    | 11 | - | 0.414 |
| 260 | P25786   | Proteasome subunit alpha type-1;Proteasome subunit alpha type                                                             | PSMA1                   | 11 | - | 0.371 |
| 261 | P15531   | Nucleoside diphosphate kinase A                                                                                           | NME1                    | 11 | - | 0.361 |
| 262 | Q15046   | Lysine--tRNA ligase                                                                                                       | KARS                    | 11 | - | 0.317 |
| 263 | Q96TA1-2 | Niban-like protein 1                                                                                                      | FAM129B                 | 11 | - | 0.312 |

|     |          |                                                                                                                                                |                          |    |   |       |
|-----|----------|------------------------------------------------------------------------------------------------------------------------------------------------|--------------------------|----|---|-------|
| 264 | P14868   | Aspartate--tRNA ligase, cytoplasmic                                                                                                            | DARS;<br>DKFZp781B11202  | 11 | - | 0.308 |
| 265 | Q58FF8   | Putative heat shock protein HSP 90-beta 2                                                                                                      | HSP90AB2P                | 11 | - | 0.295 |
| 266 | P26640   | Valine--tRNA ligase                                                                                                                            | VARS                     | 11 | - | 0.269 |
| 267 | I3L397   | Eukaryotic translation initiation factor 5A-1;Eukaryotic translation initiation factor 5A-2;Eukaryotic translation initiation factor 5A-1-like | EIF5A;EIF5A2;<br>EIF5AL1 | 11 | - | 0.26  |
| 268 | P19022   | Cadherin-2                                                                                                                                     | CDH2                     | 11 | + | 0.203 |
| 269 | P05198   | Eukaryotic translation initiation factor 2 subunit 1                                                                                           | EIF2S1                   | 11 | - | 0.113 |
| 270 | P09486   | SPARC                                                                                                                                          | SPARC                    | 10 | + | 0.942 |
| 271 | Q92743   | Serine protease HTRA1                                                                                                                          | HTRA1                    | 10 | + | 0.772 |
| 272 | P10909-4 | Clusterin;Clusterin beta chain;Clusterin alpha chain;Clusterin                                                                                 | CLU                      | 10 | - | 0.767 |
| 273 | P21589   | 5-nucleotidase                                                                                                                                 | NT5E                     | 10 | + | 0.764 |
| 274 | P21810   | Biglycan                                                                                                                                       | BGN                      | 10 | + | 0.714 |
| 275 | P30086   | Phosphatidylethanolamine-binding protein 1;Hippocampal cholinergic neurostimulating peptide                                                    | PEBP1                    | 10 | - | 0.672 |
| 276 | P06748-2 | Nucleophosmin                                                                                                                                  | NPM1                     | 10 | - | 0.658 |
| 277 | P16930   | Fumarylacetoacetase                                                                                                                            | FAH;<br>DKFZp686F13224   | 10 | - | 0.582 |
| 278 | P25705   | ATP synthase subunit alpha, mitochondrial                                                                                                      | ATP5A1                   | 10 | - | 0.574 |
| 279 | Q01995   | Transgelin                                                                                                                                     | TAGLN                    | 10 | - | 0.56  |
| 280 | P07384   | Calpain-1 catalytic subunit                                                                                                                    | CAPN1                    | 10 | - | 0.554 |
| 281 | O75874   | Isocitrate dehydrogenase [NADP] cytoplasmic                                                                                                    | IDH1                     | 10 | - | 0.547 |
| 282 | P13798   | Acylamino-acid-releasing enzyme                                                                                                                | APEH                     | 10 | - | 0.547 |
| 283 | Q14766-3 | Latent-transforming growth factor beta-binding protein 1                                                                                       | LTBP1                    | 10 | + | 0.531 |
| 284 | P04062-4 | Glucosylceramidase                                                                                                                             | GBA                      | 10 | - | 0.525 |
| 285 | Q16222-3 | UDP-N-acetylhexosamine pyrophosphorylase;UDP-N-acetylgalactosamine pyrophosphorylase;UDP-N-acetylglucosamine pyrophosphorylase                 | UAP1                     | 10 | - | 0.524 |
| 286 | Q13838   | Spliceosome RNA helicase DDX39B                                                                                                                | DDX39B                   | 10 | - | 0.509 |
| 287 | P00505   | Aspartate aminotransferase, mitochondrial                                                                                                      | GOT2                     | 10 | + | 0.505 |
| 288 | P22234   | Multifunctional protein ADE2;Phosphoribosylaminoimidazole-succinocarboxamide synthase;Phosphoribosylaminoimidazole carboxylase                 | PAICS                    | 10 | - | 0.502 |
| 289 | P07954-2 | Fumarate hydratase, mitochondrial                                                                                                              | FH                       | 10 | - | 0.493 |
| 290 | P23396   | 40S ribosomal protein S3                                                                                                                       | RPS3                     | 10 | - | 0.49  |
| 291 | P07737   | Profilin-1                                                                                                                                     | PFN1                     | 10 | - | 0.469 |
| 292 | B4DDG7   | AP-1 complex subunit mu-1                                                                                                                      | AP1M1                    | 10 | - | 0.454 |
| 293 | F5GWP8   | NA                                                                                                                                             | JUP                      | 10 | - | 0.446 |
| 294 | Q96KP4   | Cytosolic non-specific dipeptidase                                                                                                             | CNDP2                    | 10 | - | 0.443 |

|     |          |                                                                                                                                         |                       |    |    |       |
|-----|----------|-----------------------------------------------------------------------------------------------------------------------------------------|-----------------------|----|----|-------|
| 295 | P16870-2 | Carboxypeptidase E                                                                                                                      | CPE                   | 10 | -  | 0.379 |
| 296 | P31946-2 | 14-3-3 protein beta/alpha;14-3-3 protein beta/alpha, N-terminally processed                                                             | YWHAB                 | 10 | -  | 0.371 |
| 297 | P00367   | Glutamate dehydrogenase 1, mitochondrial;Glutamate dehydrogenase;Glutamate dehydrogenase 2, mitochondrial                               | GLUD1;GLUD2           | 10 | -  | 0.363 |
| 298 | P28482   | Mitogen-activated protein kinase 1                                                                                                      | MAPK1                 | 10 | -  | 0.352 |
| 299 | Q16851-2 | UTP--glucose-1-phosphate uridylyltransferase                                                                                            | UGP2                  | 10 | -  | 0.342 |
| 300 | P62937   | Peptidyl-prolyl cis-trans isomerase A;Peptidyl-prolyl cis-trans isomerase A, N-terminally processed;Peptidyl-prolyl cis-trans isomerase | PPIA                  | 10 | -  | 0.339 |
| 301 | P46926   | Glucosamine-6-phosphate isomerase 1                                                                                                     | GNPDA1                | 10 | -  | 0.333 |
| 302 | P25787   | Proteasome subunit alpha type-2                                                                                                         | PSMA2                 | 10 | -  | 0.33  |
| 303 | B4DJ10   | Leucine--tRNA ligase, cytoplasmic                                                                                                       | LARS                  | 10 | -  | 0.311 |
| 304 | Q13616   | Cullin-1                                                                                                                                | CUL1                  | 10 | -  | 0.278 |
| 305 | P48444   | Coatomer subunit delta                                                                                                                  | ARCN1                 | 10 | -  | 0.256 |
| 306 | O14818   | Proteasome subunit alpha type-7;Proteasome subunit alpha type-7-like                                                                    | PSMA7;PSMA8           | 10 | -  | 0.248 |
| 307 | O00231   | 26S proteasome non-ATPase regulatory subunit 11                                                                                         | PSMD11                | 10 | -  | 0.244 |
| 308 | Q92841-1 | Probable ATP-dependent RNA helicase DDX17                                                                                               | DDX17                 | 10 | -  | 0.237 |
| 309 | P09651-3 | Heterogeneous nuclear ribonucleoprotein A1;Heterogeneous nuclear ribonucleoprotein A1-like 2                                            | HNRNPA1;<br>HNRNPA1L2 | 10 | -  | 0.153 |
| 310 | P98160   | Basement membrane-specific heparan sulfate proteoglycan core protein;Endorepellin;LG3 peptide                                           | HSPG2                 | 10 | NA | NA    |
| 311 | P50454   | Serpin H1                                                                                                                               | SERPINH1              | 9  | +  | 0.864 |
| 312 | P23284   | Peptidyl-prolyl cis-trans isomerase B                                                                                                   | PPIB                  | 9  | +  | 0.853 |
| 313 | P08476   | Inhibin beta A chain                                                                                                                    | INHBA                 | 9  | +  | 0.814 |
| 314 | P07602   | Proactivator polypeptide;Saposin-A;Saposin-B-Val;Saposin-B;Saposin-C;Saposin-D                                                          | PSAP                  | 9  | +  | 0.785 |
| 315 | P07858   | Cathepsin B;Cathepsin B light chain;Cathepsin B heavy chain                                                                             | CTSB                  | 9  | +  | 0.77  |
| 316 | O14773   | Tripeptidyl-peptidase 1                                                                                                                 | TPP1                  | 9  | +  | 0.746 |
| 317 | P48723   | Heat shock 70 kDa protein 13                                                                                                            | HSPA13                | 9  | +  | 0.666 |
| 318 | Q9UJ70   | N-acetyl-D-glucosamine kinase                                                                                                           | NAGK                  | 9  | -  | 0.664 |
| 319 | P23528   | Cofilin-1                                                                                                                               | CFL1                  | 9  | -  | 0.628 |
| 320 | B4DJV2   | Citrate synthase;Citrate synthase, mitochondrial                                                                                        | CS                    | 9  | -  | 0.602 |
| 321 | Q96AY3   | Peptidyl-prolyl cis-trans isomerase FKBP10                                                                                              | FKBP10                | 9  | +  | 0.589 |
| 322 | Q15437   | Protein transport protein Sec23B                                                                                                        | SEC23B                | 9  | -  | 0.579 |
| 323 | P51884   | Lumican                                                                                                                                 | LUM                   | 9  | +  | 0.543 |
| 324 | O76003   | Glutaredoxin-3                                                                                                                          | GLRX3                 | 9  | -  | 0.542 |
| 325 | O95373   | Importin-7                                                                                                                              | IPO7                  | 9  | -  | 0.532 |

|     |          |                                                                       |                     |   |    |       |
|-----|----------|-----------------------------------------------------------------------|---------------------|---|----|-------|
| 326 | Q16270-2 | Insulin-like growth factor-binding protein 7                          | IGFBP7              | 9 | +  | 0.525 |
| 327 | P30740   | Leukocyte elastase inhibitor                                          | SERPINB1            | 9 | -  | 0.516 |
| 328 | Q99497   | Protein DJ-1                                                          | PARK7               | 9 | -  | 0.493 |
| 329 | P41250   | Glycine--tRNA ligase                                                  | GARS                | 9 | +  | 0.483 |
| 330 | P52907   | F-actin-capping protein subunit alpha-1                               | CAPZA1              | 9 | -  | 0.48  |
| 331 | P51858   | Hepatoma-derived growth factor                                        | HDGF                | 9 | -  | 0.477 |
| 332 | Q8WVQ1-3 | Soluble calcium-activated nucleotidase 1                              | CANT1               | 9 | -  | 0.47  |
| 333 | Q13740-2 | CD166 antigen                                                         | ALCAM               | 9 | +  | 0.461 |
| 334 | P47755   | F-actin-capping protein subunit alpha-2                               | CAPZA2              | 9 | -  | 0.454 |
| 335 | Q16181-2 | Septin-7                                                              | SEPT7               | 9 | -  | 0.448 |
| 336 | O95433   | Activator of 90 kDa heat shock protein ATPase homolog 1               | AHSA1               | 9 | -  | 0.431 |
| 337 | P26599   | Polypyrimidine tract-binding protein 1                                | PTBP1               | 9 | -  | 0.415 |
| 338 | P17812   | CTP synthase 1                                                        | CTPS1               | 9 | -  | 0.388 |
| 339 | Q9UL46   | Proteasome activator complex subunit 2                                | PSME2               | 9 | -  | 0.363 |
| 340 | P09972   | Fructose-bisphosphate aldolase C;Fructose-bisphosphate aldolase       | ALDOC               | 9 | -  | 0.323 |
| 341 | P61160   | Actin-related protein 2                                               | ACTR2               | 9 | -  | 0.311 |
| 342 | P17066   | Heat shock 70 kDa protein 6;Putative heat shock 70 kDa protein 7      | HSPA6;HSPA7         | 9 | -  | 0.269 |
| 343 | P25788-2 | Proteasome subunit alpha type-3                                       | PSMA3               | 9 | -  | 0.245 |
| 344 | Q9UKK9   | ADP-sugar pyrophosphatase                                             | NUDT5               | 9 | -  | 0.188 |
| 345 | Q06323   | Proteasome activator complex subunit 1                                | PSME1               | 9 | -  | 0.17  |
| 346 | Q5VTE0   | Putative elongation factor 1-alpha-like 3;Elongation factor 1-alpha 1 | EEF1A1P5;<br>EEF1A1 | 9 | -  | 0.154 |
| 347 | Q8WUM4   | Programmed cell death 6-interacting protein                           | PDCD6IP             | 9 | -  | 0.143 |
| 348 | P51665   | 26S proteasome non-ATPase regulatory subunit 7                        | PSMD7               | 9 | -  | 0.13  |
| 349 | B5MCX3   | Septin-2                                                              | SEPT2               | 9 | -  | 0.13  |
| 350 | D6RGI3   | Septin-11                                                             | SEPT11              | 9 | -  | 0.067 |
| 351 | P20908   | Collagen alpha-1(V) chain                                             | COL5A1              | 9 | +  | 0.053 |
| 352 | X6RKN2   | Neurofascin                                                           | NFASC               | 9 | NA | NA    |
| 353 | Q9Y240   | C-type lectin domain family 11 member A                               | CLEC11A             | 8 | +  | 0.873 |
| 354 | Q8NBJ7   | Sulfatase-modifying factor 2                                          | SUMF2               | 8 | +  | 0.796 |
| 355 | Q16769   | Glutaminyl-peptide cyclotransferase                                   | QPCT                | 8 | +  | 0.788 |
| 356 | Q9BTY2   | Plasma alpha-L-fucosidase                                             | FUCA2               | 8 | +  | 0.779 |
| 357 | O43854-2 | EGF-like repeat and discoidin I-like domain-containing protein 3      | EDIL3               | 8 | +  | 0.762 |
| 358 | P07339   | Cathepsin D;Cathepsin D light chain;Cathepsin D heavy chain           | CTSD                | 8 | +  | 0.758 |
| 359 | P28074   | Proteasome subunit beta type-5                                        | PSMB5               | 8 | -  | 0.726 |
| 360 | P35998   | 26S protease regulatory subunit 7                                     | PSMC2               | 8 | -  | 0.713 |
| 361 | Q7Z304   | MAM domain-containing protein 2                                       | MAMDC2              | 8 | +  | 0.701 |

|     |          |                                                                                                                                 |                      |   |   |       |
|-----|----------|---------------------------------------------------------------------------------------------------------------------------------|----------------------|---|---|-------|
| 362 | Q15084-3 | Protein disulfide-isomerase A6                                                                                                  | PDIA6                | 8 | + | 0.695 |
| 363 | Q9HB71   | Calcyclin-binding protein                                                                                                       | CACYBP               | 8 | - | 0.69  |
| 364 | P05023-3 | Sodium/potassium-transporting ATPase subunit alpha-1                                                                            | ATP1A1               | 8 | - | 0.673 |
| 365 | P62333   | 26S protease regulatory subunit 10B                                                                                             | PSMC6                | 8 | - | 0.619 |
| 366 | Q8TF66   | Leucine-rich repeat-containing protein 15                                                                                       | LRRC15               | 8 | + | 0.606 |
| 367 | P62826   | GTP-binding nuclear protein Ran                                                                                                 | RAN                  | 8 | - | 0.582 |
| 368 | Q96P70   | Importin-9                                                                                                                      | IPO9                 | 8 | - | 0.572 |
| 369 | P31153   | S-adenosylmethionine synthase isoform type-2;S-adenosylmethionine synthase                                                      | MAT2A                | 8 | - | 0.552 |
| 370 | Q9BT78   | COP9 signalosome complex subunit 4                                                                                              | COPS4                | 8 | - | 0.55  |
| 371 | Q9UNM6   | 26S proteasome non-ATPase regulatory subunit 13                                                                                 | PSMD13               | 8 | - | 0.527 |
| 372 | Q9NZL9   | Methionine adenosyltransferase 2 subunit beta                                                                                   | MAT2B                | 8 | - | 0.519 |
| 373 | P17655   | Calpain-2 catalytic subunit                                                                                                     | CAPN2                | 8 | - | 0.506 |
| 374 | Q13822   | Ectonucleotide pyrophosphatase/phosphodiesterase family member 2                                                                | ENPP2                | 8 | + | 0.488 |
| 375 | P20618   | Proteasome subunit beta type-1                                                                                                  | PSMB1                | 8 | - | 0.473 |
| 376 | Q86UY0   | Thioredoxin domain-containing protein 5                                                                                         | TXNDC5               | 8 | - | 0.465 |
| 377 | B4DIH5   | COP9 signalosome complex subunit 2                                                                                              | COPS2                | 8 | - | 0.463 |
| 378 | Q04828   | Aldo-keto reductase family 1 member C1;Aldo-keto reductase family 1 member C2;Aldo-keto reductase family 1 member C3            | AKR1C1;AKR1C2;AKR1C3 | 8 | - | 0.461 |
| 379 | Q14112-2 | Nidogen-2                                                                                                                       | NID2                 | 8 | - | 0.46  |
| 380 | B7Z1R5   | V-type proton ATPase catalytic subunit A                                                                                        | ATP6V1A              | 8 | - | 0.442 |
| 381 | P41091   | Eukaryotic translation initiation factor 2 subunit 3;Putative eukaryotic translation initiation factor 2 subunit 3-like protein | EIF2S3;EIF2S3L       | 8 | - | 0.44  |
| 382 | P40121   | Macrophage-capping protein                                                                                                      | CAPG                 | 8 | - | 0.439 |
| 383 | P04179-4 | Superoxide dismutase [Mn], mitochondrial                                                                                        | SOD2                 | 8 | - | 0.43  |
| 384 | C9J9K3   | 40S ribosomal protein SA                                                                                                        | RPSA;RPSAP58         | 8 | - | 0.428 |
| 385 | P23381-2 | Tryptophan--tRNA ligase, cytoplasmic;T1-TrpRS;T2-TrpRS                                                                          | WARS                 | 8 | - | 0.426 |
| 386 | E9PKG1   | Protein arginine N-methyltransferase 1                                                                                          | PRMT1                | 8 | - | 0.416 |
| 387 | P22676   | Calretinin                                                                                                                      | CALB2                | 8 | - | 0.416 |
| 388 | Q9NUQ9   | Protein FAM49B                                                                                                                  | FAM49B               | 8 | - | 0.414 |
| 389 | F5H4L7   | Vacuolar protein sorting-associated protein 26A                                                                                 | VPS26A               | 8 | - | 0.413 |
| 390 | P29144   | Tripeptidyl-peptidase 2                                                                                                         | TPP2                 | 8 | - | 0.413 |
| 391 | P46063   | ATP-dependent DNA helicase Q1                                                                                                   | RECQL                | 8 | - | 0.4   |
| 392 | P27694   | Replication protein A 70 kDa DNA-binding subunit;Replication protein A 70 kDa DNA-binding subunit, N-terminally processed       | RPA1                 | 8 | - | 0.393 |
| 393 | P35555   | Fibrillin-1                                                                                                                     | FBN1                 | 8 | + | 0.391 |

|     |          |                                                                                                                                                                                                                                  |                     |   |   |       |
|-----|----------|----------------------------------------------------------------------------------------------------------------------------------------------------------------------------------------------------------------------------------|---------------------|---|---|-------|
| 394 | P11586   | C-1-tetrahydrofolate synthase, cytoplasmic;Methylenetetrahydrofolate dehydrogenase;Methenyltetrahydrofolate cyclohydrolase; Formyltetrahydrofolate synthetase;C-1-tetrahydrofolate synthase, cytoplasmic, N-terminally processed | MTHFD1              | 8 | - | 0.382 |
| 395 | P08243-2 | Asparagine synthetase [glutamine-hydrolyzing]                                                                                                                                                                                    | ASNS                | 8 | - | 0.364 |
| 396 | Q15262   | Receptor-type tyrosine-protein phosphatase kappa                                                                                                                                                                                 | PTPRK               | 8 | + | 0.36  |
| 397 | F5H4X1   | General vesicular transport factor p115                                                                                                                                                                                          | USO1                | 8 | - | 0.346 |
| 398 | O00232   | 26S proteasome non-ATPase regulatory subunit 12                                                                                                                                                                                  | PSMD12              | 8 | - | 0.315 |
| 399 | P61981   | 14-3-3 protein gamma;14-3-3 protein gamma, N-terminally processed                                                                                                                                                                | YWHAQ               | 8 | - | 0.29  |
| 400 | Q06481-5 | Amyloid-like protein 2                                                                                                                                                                                                           | APLP2               | 8 | + | 0.267 |
| 401 | P27348   | 14-3-3 protein theta                                                                                                                                                                                                             | YWHAQ               | 8 | - | 0.256 |
| 402 | Q12907   | Vesicular integral-membrane protein VIP36                                                                                                                                                                                        | LMAN2               | 8 | + | 0.222 |
| 403 | P33176   | Kinesin-1 heavy chain                                                                                                                                                                                                            | KIF5B               | 8 | - | 0.202 |
| 404 | P07910-4 | Heterogeneous nuclear ribonucleoproteins C1/C2;Heterogeneous nuclear ribonucleoprotein C-like 1                                                                                                                                  | HNRNPC;<br>HNRNPCL1 | 8 | - | 0.114 |
| 405 | P05141   | ADP/ATP translocase 2;ADP/ATP translocase 2, N-terminally processed                                                                                                                                                              | SLC25A5             | 8 | - | 0.03  |
| 406 | Q96D15   | Reticulocalbin-3                                                                                                                                                                                                                 | RCN3                | 7 | + | 0.95  |
| 407 | O95502   | Neuronal pentraxin receptor                                                                                                                                                                                                      | NPTXR               | 7 | + | 0.88  |
| 408 | P54819-2 | Adenylate kinase 2, mitochondrial;Adenylate kinase 2, mitochondrial, N-terminally processed                                                                                                                                      | AK2                 | 7 | - | 0.877 |
| 409 | O95336   | 6-phosphogluconolactonase                                                                                                                                                                                                        | PGLS                | 7 | - | 0.87  |
| 410 | O00303   | Eukaryotic translation initiation factor 3 subunit F                                                                                                                                                                             | EIF3F               | 7 | - | 0.824 |
| 411 | O00462   | Beta-mannosidase                                                                                                                                                                                                                 | MANBA               | 7 | + | 0.776 |
| 412 | P17931   | Galectin-3                                                                                                                                                                                                                       | LGALS3              | 7 | - | 0.77  |
| 413 | P00492   | Hypoxanthine-guanine phosphoribosyltransferase                                                                                                                                                                                   | HPRT1               | 7 | - | 0.767 |
| 414 | Q14019   | Coactosin-like protein                                                                                                                                                                                                           | COTL1               | 7 | - | 0.765 |
| 415 | Q96HE7   | ERO1-like protein alpha                                                                                                                                                                                                          | ERO1L               | 7 | + | 0.746 |
| 416 | E7EU96   | Casein kinase II subunit alpha;Casein kinase II subunit alpha 3                                                                                                                                                                  | CSNK2A1;<br>CSNK2A3 | 7 | - | 0.741 |
| 417 | Q9BWS9-3 | Chitinase domain-containing protein 1                                                                                                                                                                                            | CHID1               | 7 | + | 0.731 |
| 418 | O15372   | Eukaryotic translation initiation factor 3 subunit H                                                                                                                                                                             | EIF3H;EIF3S3        | 7 | - | 0.702 |
| 419 | P10451-3 | Osteopontin                                                                                                                                                                                                                      | SPP1                | 7 | + | 0.697 |
| 420 | E7EMB6   | Aspartyl aminopeptidase                                                                                                                                                                                                          | DNPEP               | 7 | - | 0.671 |
| 421 | O95861-4 | 3(2),5-bisphosphate nucleotidase 1                                                                                                                                                                                               | BPNT1               | 7 | - | 0.65  |
| 422 | Q12792-4 | Twinfilin-1                                                                                                                                                                                                                      | TWF1                | 7 | - | 0.638 |
| 423 | P61086   | Ubiquitin-conjugating enzyme E2 K                                                                                                                                                                                                | UBE2K               | 7 | - | 0.627 |

|     |          |                                                                                                                                                                                                                           |               |   |   |       |
|-----|----------|---------------------------------------------------------------------------------------------------------------------------------------------------------------------------------------------------------------------------|---------------|---|---|-------|
| 424 | G3V3M6   | DNA-(apurinic or apyrimidinic site) lyase;DNA-(apurinic or apyrimidinic site) lyase, mitochondrial                                                                                                                        | APEX1         | 7 | - | 0.622 |
| 425 | Q09028-3 | Histone-binding protein RBBP4                                                                                                                                                                                             | RBBP4         | 7 | - | 0.618 |
| 426 | B4DTT5   | Follistatin-related protein 1                                                                                                                                                                                             | FSTL1         | 7 | + | 0.61  |
| 427 | P30085   | UMP-CMP kinase                                                                                                                                                                                                            | CMPK1         | 7 | - | 0.604 |
| 428 | P55290   | Cadherin-13                                                                                                                                                                                                               | CDH13         | 7 | + | 0.601 |
| 429 | HOYHC3   | Nucleosome assembly protein 1-like 1                                                                                                                                                                                      | NAP1L1        | 7 | - | 0.6   |
| 430 | P00390-2 | Glutathione reductase, mitochondrial                                                                                                                                                                                      | GSR           | 7 | - | 0.591 |
| 431 | P28062-2 | Proteasome subunit beta type-8                                                                                                                                                                                            | PSMB8         | 7 | - | 0.588 |
| 432 | O00754-2 | Lysosomal alpha-mannosidase;Lysosomal alpha-mannosidase A peptide;Lysosomal alpha-mannosidase B peptide;Lysosomal alpha-mannosidase C peptide;Lysosomal alpha-mannosidase D peptide;Lysosomal alpha-mannosidase E peptide | MAN2B1        | 7 | - | 0.588 |
| 433 | P29218   | Inositol monophosphatase 1                                                                                                                                                                                                | IMPA1         | 7 | - | 0.577 |
| 434 | P28070   | Proteasome subunit beta type-4                                                                                                                                                                                            | PSMB4         | 7 | - | 0.565 |
| 435 | Q15404   | Ras suppressor protein 1                                                                                                                                                                                                  | RSU1          | 7 | - | 0.562 |
| 436 | P53004   | Biliverdin reductase A                                                                                                                                                                                                    | BLVRA         | 7 | - | 0.543 |
| 437 | Q13347   | Eukaryotic translation initiation factor 3 subunit I                                                                                                                                                                      | EIF3I         | 7 | - | 0.54  |
| 438 | P29692   | Elongation factor 1-delta                                                                                                                                                                                                 | EEF1D         | 7 | - | 0.529 |
| 439 | P32119   | Peroxiredoxin-2                                                                                                                                                                                                           | PRDX2         | 7 | - | 0.522 |
| 440 | Q08257   | Quinone oxidoreductase                                                                                                                                                                                                    | CRYZ          | 7 | - | 0.511 |
| 441 | P04083   | Annexin A1                                                                                                                                                                                                                | ANXA1         | 7 | - | 0.511 |
| 442 | Q8TDQ7   | Glucosamine-6-phosphate isomerase 2                                                                                                                                                                                       | GNPDA2        | 7 | - | 0.508 |
| 443 | Q99536   | Synaptic vesicle membrane protein VAT-1 homolog                                                                                                                                                                           | VAT1          | 7 | - | 0.491 |
| 444 | Q09328   | Alpha-1,6-mannosylglycoprotein 6-beta-N-acetylglucosaminyltransferase A                                                                                                                                                   | MGAT5         | 7 | + | 0.486 |
| 445 | Q92973-2 | Transportin-1                                                                                                                                                                                                             | TNPO1         | 7 | - | 0.486 |
| 446 | Q9UMS4   | Pre-mRNA-processing factor 19                                                                                                                                                                                             | PRPF19        | 7 | - | 0.482 |
| 447 | Q96CG1   | Eukaryotic peptide chain release factor subunit 1                                                                                                                                                                         | ETF1          | 7 | - | 0.468 |
| 448 | Q99436   | Proteasome subunit beta type-7                                                                                                                                                                                            | PSMB7         | 7 | - | 0.467 |
| 449 | P78539-3 | Sushi repeat-containing protein SRPX                                                                                                                                                                                      | SRPX          | 7 | + | 0.46  |
| 450 | E7EP00   | Protein transport protein Sec24C                                                                                                                                                                                          | SEC24C        | 7 | - | 0.454 |
| 451 | P21283   | V-type proton ATPase subunit C 1                                                                                                                                                                                          | ATP6V1C1      | 7 | - | 0.436 |
| 452 | P60900   | Proteasome subunit alpha type-6;Proteasome subunit alpha type                                                                                                                                                             | PSMA6         | 7 | - | 0.429 |
| 453 | Q5T7C4   | High mobility group protein B1;Putative high mobility group protein B1-like 1                                                                                                                                             | HMGB1;HMGB1P1 | 7 | - | 0.427 |
| 454 | Q5H9A7   | Metalloproteinase inhibitor 1                                                                                                                                                                                             | TIMP1         | 7 | - | 0.412 |
| 455 | O00299   | Chloride intracellular channel protein 1                                                                                                                                                                                  | CLIC1         | 7 | - | 0.395 |
| 456 | E9PP73   | Coatomer subunit beta                                                                                                                                                                                                     | COPB1         | 7 | - | 0.385 |



|     |          |                                                                                                                                                 |                         |   |   |       |
|-----|----------|-------------------------------------------------------------------------------------------------------------------------------------------------|-------------------------|---|---|-------|
| 457 | O43143   | Putative pre-mRNA-splicing factor ATP-dependent RNA helicase DHX15                                                                              | DHX15                   | 7 | - | 0.382 |
| 458 | Q9Y678   | Coatomer subunit gamma-1                                                                                                                        | COPG1                   | 7 | - | 0.381 |
| 459 | Q16394   | Exostosin-1                                                                                                                                     | EXT1                    | 7 | + | 0.371 |
| 460 | A5A3E0   | POTE ankyrin domain family member F;POTE ankyrin domain family member E;POTE ankyrin domain family member I;POTE ankyrin domain family member J | POTEF;POTEE;POTEI;POTEJ | 7 | - | 0.364 |
| 461 | O43242   | 26S proteasome non-ATPase regulatory subunit 3                                                                                                  | PSMD3                   | 7 | - | 0.358 |
| 462 | F5GYN4   | Ubiquitin thioesterase OTUB1                                                                                                                    | OTUB1                   | 7 | - | 0.343 |
| 463 | Q08629   | Testican-1                                                                                                                                      | SPOCK1                  | 7 | + | 0.271 |
| 464 | P55268   | Laminin subunit beta-2                                                                                                                          | LAMB2                   | 7 | + | 0.261 |
| 465 | H3BRV0   | Eukaryotic translation initiation factor 3 subunit C;Eukaryotic translation initiation factor 3 subunit C-like protein                          | EIF3C;EIF3CL            | 7 | - | 0.258 |
| 466 | P61326   | Protein mago nashi homolog                                                                                                                      | MAGOH;MAGOHB            | 7 | - | 0.256 |
| 467 | P49591   | Serine--tRNA ligase, cytoplasmic                                                                                                                | SARS                    | 7 | - | 0.229 |
| 468 | E9PGT1   | Translin                                                                                                                                        | TSN                     | 7 | - | 0.226 |
| 469 | P25789   | Proteasome subunit alpha type-4;Proteasome subunit alpha type;Proteasome subunit beta type                                                      | PSMA4                   | 7 | - | 0.209 |
| 470 | Q92859-3 | Neogenin                                                                                                                                        | NEO1                    | 7 | + | 0.184 |
| 471 | D6R9P3   | Heterogeneous nuclear ribonucleoprotein A/B                                                                                                     | HNRNPAB                 | 7 | - | 0.183 |
| 472 | P05388   | 60S acidic ribosomal protein P0;60S acidic ribosomal protein P0-like                                                                            | RPLP0;RPLP0P6           | 7 | - | 0.15  |
| 473 | Q58FF6   | Putative heat shock protein HSP 90-beta 4                                                                                                       | HSP90AB4P               | 7 | - | 0.139 |
| 474 | Q99733   | Nucleosome assembly protein 1-like 4                                                                                                            | NAP1L4                  | 7 | - | 0.12  |
| 475 | Q14118   | Dystroglycan;Alpha-dystroglycan;Beta-dystroglycan                                                                                               | DAG1                    | 7 | + | 0.11  |
| 476 | H0YA96   | Heterogeneous nuclear ribonucleoprotein D0                                                                                                      | HNRNPD                  | 7 | - | 0.1   |
| 477 | O43390   | Heterogeneous nuclear ribonucleoprotein R                                                                                                       | HNRNPR;HNRPR            | 7 | - | 0.077 |
| 478 | P01034   | Cystatin-C                                                                                                                                      | CST3                    | 6 | + | 0.937 |
| 479 | P30040   | Endoplasmic reticulum resident protein 29                                                                                                       | ERP29                   | 6 | + | 0.933 |
| 480 | P52823   | Stanniocalcin-1                                                                                                                                 | STC1                    | 6 | + | 0.911 |
| 481 | P01137   | Transforming growth factor beta-1;Latency-associated peptide                                                                                    | TGFB1                   | 6 | + | 0.868 |
| 482 | P30043   | Flavin reductase (NADPH)                                                                                                                        | BLVRB                   | 6 | - | 0.834 |
| 483 | O15460-2 | Prolyl 4-hydroxylase subunit alpha-2                                                                                                            | P4HA2                   | 6 | + | 0.797 |
| 484 | B3KWK7   | Insulin-like growth factor-binding protein 3                                                                                                    | IGFBP3                  | 6 | - | 0.778 |
| 485 | O00622   | Protein CYR61                                                                                                                                   | CYR61                   | 6 | + | 0.772 |
| 486 | P50502   | Hsc70-interacting protein;Putative protein FAM10A5;Putative protein FAM10A4                                                                     | ST13;ST13P5;ST13P4      | 6 | - | 0.765 |

|     |          |                                                                                                                                                                                                                                                                 |                                |   |   |       |
|-----|----------|-----------------------------------------------------------------------------------------------------------------------------------------------------------------------------------------------------------------------------------------------------------------|--------------------------------|---|---|-------|
| 487 | P15291-2 | Beta-1,4-galactosyltransferase 1;Lactose synthase A protein;N-acetyllactosamine synthase;Beta-N-acetylglucosaminylglycopeptide beta-1,4-galactosyltransferase;Beta-N-acetylglucosaminyl-glycolipid beta-1,4-galactosyltransferase;Processed beta-1,4-galactosyl | B4GALT1                        | 6 | + | 0.764 |
| 488 | F8VZY9   | Keratin, type I cytoskeletal 18                                                                                                                                                                                                                                 | KRT18                          | 6 | - | 0.763 |
| 489 | P62249   | 40S ribosomal protein S16                                                                                                                                                                                                                                       | RPS16                          | 6 | - | 0.735 |
| 490 | B5MCZ3   | Interleukin-6                                                                                                                                                                                                                                                   | IL6                            | 6 | - | 0.71  |
| 491 | P42785   | Lysosomal Pro-X carboxypeptidase                                                                                                                                                                                                                                | PRCP                           | 6 | + | 0.71  |
| 492 | Q7Z4H8   | KDEL motif-containing protein 2                                                                                                                                                                                                                                 | KDEL2                          | 6 | + | 0.709 |
| 493 | P36551   | Coproporphyrinogen-III oxidase, mitochondrial                                                                                                                                                                                                                   | CPOX                           | 6 | - | 0.696 |
| 494 | Q9H488   | GDP-fucose protein O-fucosyltransferase 1                                                                                                                                                                                                                       | POFUT1                         | 6 | + | 0.686 |
| 495 | P62158   | Calmodulin                                                                                                                                                                                                                                                      | CALM1;CALM2;<br>CALM3          | 6 | - | 0.676 |
| 496 | Q9UNS2   | COP9 signalosome complex subunit 3                                                                                                                                                                                                                              | COPS3                          | 6 | - | 0.655 |
| 497 | Q96IU4   | Alpha/beta hydrolase domain-containing protein 14B                                                                                                                                                                                                              | ABHD14B                        | 6 | - | 0.639 |
| 498 | P62906   | 60S ribosomal protein L10a                                                                                                                                                                                                                                      | RPL10A                         | 6 | - | 0.637 |
| 499 | Q9UIJ7   | GTP:AMP phosphotransferase AK3, mitochondrial                                                                                                                                                                                                                   | AK3                            | 6 | - | 0.627 |
| 500 | E9PC52   | Histone-binding protein RBBP7                                                                                                                                                                                                                                   | RBBP7                          | 6 | - | 0.624 |
| 501 | Q53FA7   | Quinone oxidoreductase PIG3                                                                                                                                                                                                                                     | TP53I3                         | 6 | - | 0.622 |
| 502 | P02794   | Ferritin heavy chain;Ferritin                                                                                                                                                                                                                                   | FTH1                           | 6 | - | 0.621 |
| 503 | A6NJA2   | Ubiquitin carboxyl-terminal hydrolase;Ubiquitin carboxyl-terminal hydrolase 14                                                                                                                                                                                  | USP14                          | 6 | - | 0.62  |
| 504 | Q9Y696   | Chloride intracellular channel protein 4                                                                                                                                                                                                                        | CLIC4                          | 6 | - | 0.612 |
| 505 | P19105   | Myosin regulatory light chain 12A;Myosin regulatory light chain 12B                                                                                                                                                                                             | MYL12A;<br>MYL12B              | 6 | - | 0.607 |
| 506 | J3QS39   | Ubiquitin-60S ribosomal protein L40;Ubiquitin;60S ribosomal protein L40;Ubiquitin-40S ribosomal protein S27a;Ubiquitin;40S ribosomal protein S27a;Polyubiquitin-B;Ubiquitin;Polyubiquitin-C;Ubiquitin                                                           | UBB;RPS27A;UBC;<br>UBA52;UBBP4 | 6 | - | 0.601 |
| 507 | B4DIT7   | Protein-glutamine gamma-glutamyltransferase 2                                                                                                                                                                                                                   | TGM2                           | 6 | - | 0.586 |
| 508 | P13693   | Translationally-controlled tumor protein                                                                                                                                                                                                                        | TPT1                           | 6 | - | 0.581 |
| 509 | B4DT69   | Dihydrolipoyl dehydrogenase;Dihydrolipoyl dehydrogenase, mitochondrial                                                                                                                                                                                          | DLD                            | 6 | - | 0.579 |
| 510 | P62136   | Serine/threonine-protein phosphatase PP1-alpha catalytic subunit;Serine/threonine-protein phosphatase                                                                                                                                                           | PPP1CA                         | 6 | - | 0.576 |
| 511 | P52292   | Importin subunit alpha-1                                                                                                                                                                                                                                        | KPNA2                          | 6 | - | 0.561 |
| 512 | P30566   | Adenylosuccinate lyase                                                                                                                                                                                                                                          | ADSL                           | 6 | - | 0.558 |
| 513 | P12955-2 | Xaa-Pro dipeptidase                                                                                                                                                                                                                                             | PEPD                           | 6 | - | 0.554 |
| 514 | P07108   | Acyl-CoA-binding protein                                                                                                                                                                                                                                        | DBI                            | 6 | - | 0.546 |
| 515 | P09211   | Glutathione S-transferase P                                                                                                                                                                                                                                     | GSTP1                          | 6 | - | 0.545 |

|     |          |                                                                                                                                                                                    |          |   |   |       |
|-----|----------|------------------------------------------------------------------------------------------------------------------------------------------------------------------------------------|----------|---|---|-------|
| 516 | P56192   | Methionine--tRNA ligase, cytoplasmic                                                                                                                                               | MARS     | 6 | - | 0.541 |
| 517 | Q13564-3 | NEDD8-activating enzyme E1 regulatory subunit                                                                                                                                      | NAE1     | 6 | - | 0.54  |
| 518 | Q9Y3I0   | tRNA-splicing ligase RtcB homolog                                                                                                                                                  | C22orf28 | 6 | - | 0.535 |
| 519 | P01130-2 | Low-density lipoprotein receptor                                                                                                                                                   | LDLR     | 6 | + | 0.534 |
| 520 | P13611-4 | Versican core protein                                                                                                                                                              | VCAN     | 6 | + | 0.534 |
| 521 | P62191   | 26S protease regulatory subunit 4                                                                                                                                                  | PSMC1    | 6 | - | 0.528 |
| 522 | P54687-4 | Branched-chain-amino-acid aminotransferase, cytosolic                                                                                                                              | BCAT1    | 6 | - | 0.526 |
| 523 | P22102   | Trifunctional purine biosynthetic protein adenosine-3;Phosphoribosylamine--glycine ligase;Phosphoribosylformylglycinamide cyclo-ligase;Phosphoribosylglycinamide formyltransferase | GART     | 6 | - | 0.526 |
| 524 | K7EJR3   | 26S proteasome non-ATPase regulatory subunit 8                                                                                                                                     | PSMD8    | 6 | - | 0.519 |
| 525 | P22061   | Protein-L-isoaspartate(D-aspartate) O-methyltransferase;Protein-L-isoaspartate O-methyltransferase                                                                                 | PCMT1    | 6 | - | 0.515 |
| 526 | Q00796   | Sorbitol dehydrogenase                                                                                                                                                             | SORD     | 6 | - | 0.511 |
| 527 | P07585   | Decorin                                                                                                                                                                            | DCN      | 6 | + | 0.506 |
| 528 | Q06210-2 | Glutamine--fructose-6-phosphate aminotransferase [isomerizing] 1                                                                                                                   | GFPT1    | 6 | - | 0.503 |
| 529 | P13796   | Plastin-2                                                                                                                                                                          | LCP1     | 6 | - | 0.502 |
| 530 | P15018   | Leukemia inhibitory factor                                                                                                                                                         | LIF      | 6 | + | 0.501 |
| 531 | P07225   | Vitamin K-dependent protein S                                                                                                                                                      | PROS1    | 6 | + | 0.5   |
| 532 | P14550   | Alcohol dehydrogenase [NADP(+)]                                                                                                                                                    | AKR1A1   | 6 | - | 0.49  |
| 533 | P28066   | Proteasome subunit alpha type-5                                                                                                                                                    | PSMA5    | 6 | - | 0.485 |
| 534 | B7Z403   | Glyoxalase domain-containing protein 4                                                                                                                                             | GLOD4    | 6 | - | 0.478 |
| 535 | P48307   | Tissue factor pathway inhibitor 2                                                                                                                                                  | TFPI2    | 6 | + | 0.473 |
| 536 | C9JFR7   | Cytochrome c                                                                                                                                                                       | CYCS     | 6 | - | 0.47  |
| 537 | P63244   | Guanine nucleotide-binding protein subunit beta-2-like 1                                                                                                                           | GNB2L1   | 6 | - | 0.465 |
| 538 | P47897   | Glutamine--tRNA ligase                                                                                                                                                             | QARS     | 6 | - | 0.462 |
| 539 | H0Y2X5   | Aldehyde dehydrogenase family 1 member A3                                                                                                                                          | ALDH1A3  | 6 | - | 0.459 |
| 540 | B4E0K5   | Mitogen-activated protein kinase 14                                                                                                                                                | MAPK14   | 6 | - | 0.456 |
| 541 | P49915   | GMP synthase [glutamine-hydrolyzing]                                                                                                                                               | GMPS     | 6 | - | 0.456 |
| 542 | P30520   | Adenylosuccinate synthetase isozyme 2                                                                                                                                              | ADSS     | 6 | - | 0.453 |
| 543 | E9PD78   | Ribonucleoside-diphosphate reductase;Ribonucleoside-diphosphate reductase large subunit                                                                                            | RRM1     | 6 | - | 0.444 |
| 544 | Q5T2B5   | Cullin-2                                                                                                                                                                           | CUL2     | 6 | - | 0.436 |
| 545 | O60701   | UDP-glucose 6-dehydrogenase                                                                                                                                                        | UGDH     | 6 | - | 0.434 |
| 546 | Q86TI2-4 | Dipeptidyl peptidase 9                                                                                                                                                             | DPP9     | 6 | - | 0.425 |
| 547 | F8W1R7   | Myosin light polypeptide 6                                                                                                                                                         | MYL6     | 6 | - | 0.423 |
| 548 | Q13308-4 | Inactive tyrosine-protein kinase 7                                                                                                                                                 | PTK7     | 6 | + | 0.418 |

|     |          |                                                                                                                  |                         |   |    |       |
|-----|----------|------------------------------------------------------------------------------------------------------------------|-------------------------|---|----|-------|
| 549 | Q7L576   | Cytoplasmic FMR1-interacting protein 1                                                                           | CYFIP1                  | 6 | -  | 0.41  |
| 550 | P62805   | Histone H4                                                                                                       | HIST1H4A                | 6 | -  | 0.408 |
| 551 | H7BZJ3   | Thioredoxin                                                                                                      | PDIA3                   | 6 | -  | 0.407 |
| 552 | P49721   | Proteasome subunit beta type-2                                                                                   | PSMB2                   | 6 | -  | 0.398 |
| 553 | P52888   | Thimet oligopeptidase                                                                                            | THOP1                   | 6 | -  | 0.374 |
| 554 | Q04917   | 14-3-3 protein eta                                                                                               | YWHAH                   | 6 | -  | 0.362 |
| 555 | Q14203-5 | Dynactin subunit 1                                                                                               | DCTN1;<br>DKFZp686E0752 | 6 | -  | 0.35  |
| 556 | P09382   | Galectin-1                                                                                                       | LGALS1                  | 6 | -  | 0.345 |
| 557 | P14324-2 | Farnesyl pyrophosphate synthase                                                                                  | FDPS                    | 6 | -  | 0.345 |
| 558 | G5EA52   | Protein disulfide-isomerase A3                                                                                   | PDIA3                   | 6 | -  | 0.331 |
| 559 | P10155-3 | 60 kDa SS-A/Ro ribonucleoprotein                                                                                 | TROVE2                  | 6 | -  | 0.331 |
| 560 | P23246   | Splicing factor, proline- and glutamine-rich                                                                     | SFPQ                    | 6 | -  | 0.318 |
| 561 | Q99460-2 | 26S proteasome non-ATPase regulatory subunit 1                                                                   | PSMD1                   | 6 | -  | 0.315 |
| 562 | Q5T6W5   | Heterogeneous nuclear ribonucleoprotein K                                                                        | HNRNPK                  | 6 | -  | 0.31  |
| 563 | Q9BS26   | Endoplasmic reticulum resident protein 44                                                                        | ERP44                   | 6 | +  | 0.309 |
| 564 | Q03252   | Lamin-B2                                                                                                         | LMNB2                   | 6 | -  | 0.286 |
| 565 | Q9BXJ9   | N-alpha-acetyltransferase 15, NatA auxiliary subunit                                                             | NAA15                   | 6 | -  | 0.285 |
| 566 | P20591   | Interferon-induced GTP-binding protein Mx1;Interferon-induced GTP-binding protein Mx1, N-terminally processed    | MX1                     | 6 | -  | 0.211 |
| 567 | Q8IUX7-2 | Adipocyte enhancer-binding protein 1                                                                             | AEBP1                   | 6 | -  | 0.195 |
| 568 | P32455   | Interferon-induced guanylate-binding protein 1                                                                   | GBP1                    | 6 | -  | 0.193 |
| 569 | H0YN26   | Acidic leucine-rich nuclear phosphoprotein 32 family member A                                                    | ANP32A                  | 6 | -  | 0.175 |
| 570 | P54727   | UV excision repair protein RAD23 homolog B                                                                       | RAD23B                  | 6 | -  | 0.148 |
| 571 | Q01105-3 | Protein SET                                                                                                      | SET                     | 6 | -  | 0.138 |
| 572 | Q14980-4 | Nuclear mitotic apparatus protein 1                                                                              | NUMA1                   | 6 | +  | 0.098 |
| 573 | Q14517   | Protocadherin Fat 1;Protocadherin Fat 1, nuclear form                                                            | FAT1                    | 6 | NA | NA    |
| 574 | O43505   | N-acetyllactosaminide beta-1,3-N-acetylglucosaminyltransferase                                                   | B3GNT1                  | 5 | +  | 0.914 |
| 575 | P61769   | Beta-2-microglobulin;Beta-2-microglobulin form pI 5.3                                                            | B2M                     | 5 | +  | 0.907 |
| 576 | Q969H8   | UPF0556 protein C19orf10                                                                                         | C19orf10                | 5 | +  | 0.906 |
| 577 | P10619-2 | Lysosomal protective protein;Lysosomal protective protein 32 kDa chain;Lysosomal protective protein 20 kDa chain | CTSA                    | 5 | +  | 0.904 |
| 578 | Q15819   | Ubiquitin-conjugating enzyme E2 variant 2;Ubiquitin-conjugating enzyme E2 variant 1                              | UBE2V2;<br>UBE2V1       | 5 | -  | 0.878 |
| 579 | J3KTF8   | Rho GDP-dissociation inhibitor 1                                                                                 | ARHGDI1                 | 5 | -  | 0.876 |
| 580 | Q92520   | Protein FAM3C                                                                                                    | FAM3C                   | 5 | +  | 0.821 |
| 581 | C9JXF9   | Insulin-like growth factor-binding protein 1                                                                     | IGFBP1                  | 5 | +  | 0.818 |

|     |          |                                                                                                                                                                                        |                   |   |   |       |
|-----|----------|----------------------------------------------------------------------------------------------------------------------------------------------------------------------------------------|-------------------|---|---|-------|
| 582 | F5GZK1   | Exostosin-like 2;Processed exostosin-like 2                                                                                                                                            | EXTL2             | 5 | + | 0.814 |
| 583 | P25774   | Cathepsin S                                                                                                                                                                            | CTSS              | 5 | + | 0.805 |
| 584 | C9JTY3   | Protein TFG                                                                                                                                                                            | TFG               | 5 | - | 0.784 |
| 585 | P42126-2 | Enoyl-CoA delta isomerase 1, mitochondrial                                                                                                                                             | ECI1;DCI          | 5 | - | 0.762 |
| 586 | Q8NBJ5   | Procollagen galactosyltransferase 1                                                                                                                                                    | COLGALT1          | 5 | + | 0.759 |
| 587 | P67809   | Nuclease-sensitive element-binding protein 1;Y-box-binding protein 3;Y-box-binding protein 2                                                                                           | YBX1;YBX3;YBX2    | 5 | - | 0.733 |
| 588 | P61088   | Ubiquitin-conjugating enzyme E2 N;Putative ubiquitin-conjugating enzyme E2 N-like                                                                                                      | UBE2N;UBE2NL      | 5 | - | 0.73  |
| 589 | Q11201   | CMP-N-acetylneuraminate-beta-galactosamide-alpha-2,3-sialyltransferase 1                                                                                                               | ST3GAL1           | 5 | + | 0.715 |
| 590 | Q6ZNF0   | Iron/zinc purple acid phosphatase-like protein                                                                                                                                         | PAPL              | 5 | + | 0.71  |
| 591 | Q5JPE7-2 | Nodal modulator 2;Nodal modulator 1;Nodal modulator 3                                                                                                                                  | NOMO2;NOMO1;NOMO3 | 5 | + | 0.708 |
| 592 | Q9UHY7   | Enolase-phosphatase E1                                                                                                                                                                 | ENOPH1            | 5 | - | 0.699 |
| 593 | Q13011   | Delta(3,5)-Delta(2,4)-dienoyl-CoA isomerase, mitochondrial                                                                                                                             | ECH1              | 5 | - | 0.696 |
| 594 | Q9UNW1   | Multiple inositol polyphosphate phosphatase 1                                                                                                                                          | MINPP1            | 5 | + | 0.684 |
| 595 | P58215   | Lysyl oxidase homolog 3                                                                                                                                                                | LOXL3             | 5 | + | 0.679 |
| 596 | Q15435-2 | Protein phosphatase 1 regulatory subunit 7                                                                                                                                             | PPP1R7            | 5 | - | 0.676 |
| 597 | P00568   | Adenylate kinase isoenzyme 1                                                                                                                                                           | AK1               | 5 | - | 0.674 |
| 598 | O15232-2 | Matrilin-3                                                                                                                                                                             | MATN3             | 5 | + | 0.659 |
| 599 | O43405   | Cochlin                                                                                                                                                                                | COCH              | 5 | + | 0.655 |
| 600 | P27701   | CD82 antigen                                                                                                                                                                           | CD82              | 5 | + | 0.654 |
| 601 | P62491-2 | Ras-related protein Rab-11A;Ras-related protein Rab-11B                                                                                                                                | RAB11A;RAB11B     | 5 | - | 0.652 |
| 602 | P59998   | Actin-related protein 2/3 complex subunit 4                                                                                                                                            | ARPC4;ARPC4-TTLL3 | 5 | - | 0.646 |
| 603 | Q05048   | Cleavage stimulation factor subunit 1                                                                                                                                                  | CSTF1             | 5 | - | 0.637 |
| 604 | E7ESM2   | Urokinase-type plasminogen activator;Urokinase-type plasminogen activator long chain A;Urokinase-type plasminogen activator short chain A;Urokinase-type plasminogen activator chain B | PLAU              | 5 | + | 0.634 |
| 605 | Q9Y281-3 | Cofilin-2                                                                                                                                                                              | CFL2              | 5 | - | 0.631 |
| 606 | C9JPM4   | ADP-ribosylation factor 4                                                                                                                                                              | ARF4              | 5 | - | 0.609 |
| 607 | P62140   | Serine/threonine-protein phosphatase PP1-beta catalytic subunit;Serine/threonine-protein phosphatase                                                                                   | PPP1CB            | 5 | - | 0.604 |
| 608 | O43592   | Exportin-T                                                                                                                                                                             | XPOT              | 5 | - | 0.597 |
| 609 | O95831-3 | Apoptosis-inducing factor 1, mitochondrial                                                                                                                                             | AIFM1             | 5 | - | 0.587 |
| 610 | H3BQQ9   | SUMO-conjugating enzyme UBC9                                                                                                                                                           | UBE2I             | 5 | - | 0.585 |
| 611 | P24844   | Myosin regulatory light polypeptide 9                                                                                                                                                  | MYL9              | 5 | - | 0.576 |

|     |          |                                                                                                                                                   |                         |   |   |       |
|-----|----------|---------------------------------------------------------------------------------------------------------------------------------------------------|-------------------------|---|---|-------|
| 612 | Q5T6H7   | Xaa-Pro aminopeptidase 1                                                                                                                          | XPNPEP1                 | 5 | - | 0.575 |
| 613 | O60687   | Sushi repeat-containing protein SRPX2                                                                                                             | SRPX2                   | 5 | + | 0.575 |
| 614 | Q9GZT8-2 | NIF3-like protein 1                                                                                                                               | NIF3L1                  | 5 | - | 0.554 |
| 615 | E7EUD0   | Dickkopf-related protein 3                                                                                                                        | DKK3                    | 5 | + | 0.55  |
| 616 | J3QKR3   | Proteasome subunit beta type-3                                                                                                                    | PSMB3                   | 5 | - | 0.55  |
| 617 | H7C3P4   | N-acetylglucosamine-6-sulfatase                                                                                                                   | GNS                     | 5 | - | 0.548 |
| 618 | Q8NCH0   | Carbohydrate sulfotransferase 14                                                                                                                  | CHST14                  | 5 | - | 0.542 |
| 619 | P49903   | Selenide, water dikinase 1                                                                                                                        | SEPHS1                  | 5 | - | 0.535 |
| 620 | P43686   | 26S protease regulatory subunit 6B                                                                                                                | PSMC4                   | 5 | - | 0.519 |
| 621 | Q12765   | Secernin-1                                                                                                                                        | SCRN1                   | 5 | - | 0.519 |
| 622 | P07711   | Cathepsin L1;Cathepsin L1 heavy chain;Cathepsin L1 light chain                                                                                    | CTSL1                   | 5 | + | 0.514 |
| 623 | O75396   | Vesicle-trafficking protein SEC22b                                                                                                                | SEC22B                  | 5 | + | 0.509 |
| 624 | P84077   | ADP-ribosylation factor 1;ADP-ribosylation factor 3;ADP-ribosylation factor 5                                                                     | ARF1;ARF3;<br>ARF5      | 5 | - | 0.508 |
| 625 | P51149   | Ras-related protein Rab-7a                                                                                                                        | RAB7A                   | 5 | - | 0.498 |
| 626 | Q8NBJ4-2 | Golgi membrane protein 1                                                                                                                          | GOLM1                   | 5 | + | 0.497 |
| 627 | B4DUX0   | Cytosolic acyl coenzyme A thioester hydrolase                                                                                                     | ACOT7                   | 5 | - | 0.491 |
| 628 | P09603   | Macrophage colony-stimulating factor 1;Processed macrophage colony-stimulating factor 1                                                           | CSF1                    | 5 | + | 0.488 |
| 629 | Q04760-2 | Lactoylglutathione lyase                                                                                                                          | GLO1                    | 5 | - | 0.488 |
| 630 | P09417-2 | Dihydropteridine reductase                                                                                                                        | QDPR                    | 5 | - | 0.487 |
| 631 | O43175   | D-3-phosphoglycerate dehydrogenase                                                                                                                | PHGDH                   | 5 | - | 0.481 |
| 632 | O75882-3 | Attractin                                                                                                                                         | ATRN                    | 5 | - | 0.478 |
| 633 | Q9Y3F4   | Serine-threonine kinase receptor-associated protein                                                                                               | STRAP                   | 5 | - | 0.471 |
| 634 | F8W7I9   | Ran GTPase-activating protein 1                                                                                                                   | RANGAP1                 | 5 | - | 0.46  |
| 635 | Q08431-2 | Lactadherin;Lactadherin short form;Medin                                                                                                          | MFGE8                   | 5 | - | 0.458 |
| 636 | M0QXS5   | Heterogeneous nuclear ribonucleoprotein L                                                                                                         | HNRNPL                  | 5 | - | 0.445 |
| 637 | Q15181   | Inorganic pyrophosphatase                                                                                                                         | PPA1                    | 5 | - | 0.433 |
| 638 | P60891   | Ribose-phosphate pyrophosphokinase 1;Ribose-phosphate pyrophosphokinase;Ribose-phosphate pyrophosphokinase 3;Ribose-phosphate pyrophosphokinase 2 | PRPS1;PRPS2;<br>PRPS1L1 | 5 | - | 0.431 |
| 639 | F6SBX2   | Isoleucine--tRNA ligase, mitochondrial                                                                                                            | IARS2                   | 5 | - | 0.429 |
| 640 | Q96CW1-2 | AP-2 complex subunit mu                                                                                                                           | AP2M1                   | 5 | - | 0.428 |
| 641 | P61289   | Proteasome activator complex subunit 3                                                                                                            | PSME3                   | 5 | - | 0.426 |
| 642 | P05362   | Intercellular adhesion molecule 1                                                                                                                 | ICAM1                   | 5 | + | 0.422 |
| 643 | P17858   | 6-phosphofructokinase, liver type;6-phosphofructokinase, muscle type                                                                              | PFKL;PFKM               | 5 | - | 0.417 |

|     |          |                                                                                                                                                                            |                         |   |   |       |
|-----|----------|----------------------------------------------------------------------------------------------------------------------------------------------------------------------------|-------------------------|---|---|-------|
| 644 | P63151   | Serine/threonine-protein phosphatase 2A 55 kDa regulatory subunit B alpha isoform                                                                                          | PPP2R2A                 | 5 | - | 0.412 |
| 645 | Q9NSD9   | Phenylalanine--tRNA ligase beta subunit                                                                                                                                    | FARSB                   | 5 | - | 0.405 |
| 646 | P34897-3 | Serine hydroxymethyltransferase, mitochondrial;Serine hydroxymethyltransferase                                                                                             | SHMT2                   | 5 | - | 0.404 |
| 647 | P04424-2 | Argininosuccinate lyase                                                                                                                                                    | ASL                     | 5 | - | 0.398 |
| 648 | B4DFL2   | Isocitrate dehydrogenase [NADP];Isocitrate dehydrogenase [NADP], mitochondrial                                                                                             | IDH2                    | 5 | - | 0.396 |
| 649 | P68036-2 | Ubiquitin-conjugating enzyme E2 L3                                                                                                                                         | UBE2L3                  | 5 | - | 0.386 |
| 650 | P48739   | Phosphatidylinositol transfer protein beta isoform                                                                                                                         | PITPNB                  | 5 | - | 0.386 |
| 651 | Q8NEZ5   | F-box only protein 22                                                                                                                                                      | FBXO22                  | 5 | - | 0.385 |
| 652 | Q7L2H7   | Eukaryotic translation initiation factor 3 subunit M                                                                                                                       | EIF3M                   | 5 | - | 0.383 |
| 653 | P48163   | NADP-dependent malic enzyme;Malic enzyme                                                                                                                                   | ME1                     | 5 | - | 0.378 |
| 654 | Q14126   | Desmoglein-2                                                                                                                                                               | DSG2                    | 5 | + | 0.375 |
| 655 | P10599   | Thioredoxin                                                                                                                                                                | TXN                     | 5 | - | 0.37  |
| 656 | P50452   | Serpin B8                                                                                                                                                                  | SERPINB8                | 5 | - | 0.36  |
| 657 | P07814   | Bifunctional glutamate/proline--tRNA ligase;Glutamate--tRNA ligase;Proline--tRNA ligase                                                                                    | EPRS                    | 5 | - | 0.359 |
| 658 | P43034   | Platelet-activating factor acetylhydrolase IB subunit alpha                                                                                                                | PAFAH1B1                | 5 | - | 0.356 |
| 659 | F5H223   | Dynactin subunit 2                                                                                                                                                         | DCTN2                   | 5 | - | 0.354 |
| 660 | Q9H4F8   | SPARC-related modular calcium-binding protein 1                                                                                                                            | SMOC1                   | 5 | + | 0.349 |
| 661 | O43809   | Cleavage and polyadenylation specificity factor subunit 5                                                                                                                  | NUDT21                  | 5 | - | 0.348 |
| 662 | Q9P258   | Protein RCC2                                                                                                                                                               | RCC2                    | 5 | - | 0.343 |
| 663 | Q9NQ88   | Fructose-2,6-bisphosphatase TIGAR                                                                                                                                          | TIGAR                   | 5 | - | 0.332 |
| 664 | Q9UHI8   | A disintegrin and metalloproteinase with thrombospondin motifs 1                                                                                                           | ADAMTS1                 | 5 | - | 0.323 |
| 665 | P35221   | Catenin alpha-1                                                                                                                                                            | CTNNA1                  | 5 | - | 0.301 |
| 666 | P39748   | Flap endonuclease 1                                                                                                                                                        | FEN1                    | 5 | - | 0.298 |
| 667 | Q8WVY7   | Ubiquitin-like domain-containing CTD phosphatase 1                                                                                                                         | UBLCP1                  | 5 | - | 0.295 |
| 668 | P17612-2 | cAMP-dependent protein kinase catalytic subunit alpha;cAMP-dependent protein kinase catalytic subunit beta                                                                 | PRKACA;KIN27;<br>PRKACB | 5 | - | 0.287 |
| 669 | P30481   | HLA class I histocompatibility antigen, B-44 alpha chain;HLA class I histocompatibility antigen, B-47 alpha chain;HLA class I histocompatibility antigen, B-13 alpha chain | HLA-B                   | 5 | + | 0.27  |
| 670 | P05387   | 60S acidic ribosomal protein P2                                                                                                                                            | RPLP2                   | 5 | - | 0.265 |
| 671 | B4DVY1   | Eukaryotic translation initiation factor 3 subunit D                                                                                                                       | EIF3D                   | 5 | - | 0.251 |
| 672 | Q9NQG5   | Regulation of nuclear pre-mRNA domain-containing protein 1B                                                                                                                | RPRD1B                  | 5 | - | 0.248 |
| 673 | O00560-3 | Syntenin-1                                                                                                                                                                 | SDCBP                   | 5 | - | 0.245 |
| 674 | Q14914-2 | Prostaglandin reductase 1                                                                                                                                                  | PTGR1                   | 5 | - | 0.22  |

|     |          |                                                                                                                                                                                                                                                                 |            |   |    |       |
|-----|----------|-----------------------------------------------------------------------------------------------------------------------------------------------------------------------------------------------------------------------------------------------------------------|------------|---|----|-------|
| 675 | Q9UHX1-4 | Poly(U)-binding-splicing factor PUF60                                                                                                                                                                                                                           | PUF60      | 5 | -  | 0.217 |
| 676 | P30685   | HLA class I histocompatibility antigen, B-35 alpha chain;HLA class I histocompatibility antigen, B-53 alpha chain;HLA class I histocompatibility antigen, B-59 alpha chain;HLA class I histocompatibility antigen, B-78 alpha chain;HLA class I histocompatibil | HLA-B      | 5 | +  | 0.217 |
| 677 | P55010   | Eukaryotic translation initiation factor 5                                                                                                                                                                                                                      | EIF5       | 5 | -  | 0.185 |
| 678 | Q04637-6 | Eukaryotic translation initiation factor 4 gamma 1                                                                                                                                                                                                              | EIF4G1     | 5 | -  | 0.136 |
| 679 | Q9Y5B9   | FACT complex subunit SPT16                                                                                                                                                                                                                                      | SUPT16H    | 5 | -  | 0.126 |
| 680 | Q00839-2 | Heterogeneous nuclear ribonucleoprotein U                                                                                                                                                                                                                       | HNRNPU     | 5 | -  | 0.075 |
| 681 | Q92688-2 | Acidic leucine-rich nuclear phosphoprotein 32 family member B                                                                                                                                                                                                   | ANP32B     | 5 | -  | 0.067 |
| 682 | Q7Z406   | Myosin-14                                                                                                                                                                                                                                                       | MYH14      | 5 | -  | 0.065 |
| 683 | O60506-4 | Heterogeneous nuclear ribonucleoprotein Q                                                                                                                                                                                                                       | SYNCRIP    | 5 | -  | 0.059 |
| 684 | Q9Y3B8-3 | Oligoribonuclease, mitochondrial                                                                                                                                                                                                                                | REXO2      | 5 | NA | NA    |
| 685 | P81605   | Dermcidin;Survival-promoting peptide;DCD-1                                                                                                                                                                                                                      | DCD        | 4 | +  | 0.957 |
| 686 | F8VXJ7   | Protein canopy homolog 2                                                                                                                                                                                                                                        | CNPY2      | 4 | +  | 0.953 |
| 687 | O60888-3 | Protein CutA                                                                                                                                                                                                                                                    | CUTA       | 4 | +  | 0.934 |
| 688 | K7EK42   | Tubulin-folding cofactor B                                                                                                                                                                                                                                      | TBCB;CKAP1 | 4 | -  | 0.921 |
| 689 | C9J8Z4   | Immunoglobulin superfamily member 8                                                                                                                                                                                                                             | IGSF8      | 4 | +  | 0.908 |
| 690 | O95881   | Thioredoxin domain-containing protein 12                                                                                                                                                                                                                        | TXNDC12    | 4 | +  | 0.836 |
| 691 | P39019   | 40S ribosomal protein S19                                                                                                                                                                                                                                       | RPS19      | 4 | -  | 0.821 |
| 692 | P30048-2 | Thioredoxin-dependent peroxide reductase, mitochondrial                                                                                                                                                                                                         | PRDX3      | 4 | -  | 0.818 |
| 693 | O95967   | EGF-containing fibulin-like extracellular matrix protein 2                                                                                                                                                                                                      | EFEMP2     | 4 | +  | 0.816 |
| 694 | J3KTH8   | Granulocyte colony-stimulating factor                                                                                                                                                                                                                           | CSF3       | 4 | +  | 0.805 |
| 695 | P22304   | Iduronate 2-sulfatase;Iduronate 2-sulfatase 42 kDa chain;Iduronate 2-sulfatase 14 kDa chain                                                                                                                                                                     | IDS        | 4 | +  | 0.799 |
| 696 | P39656   | Dolichyl-diphosphooligosaccharide--protein glycosyltransferase 48 kDa subunit                                                                                                                                                                                   | DDOST      | 4 | +  | 0.783 |
| 697 | Q9UHD8-4 | Septin-9                                                                                                                                                                                                                                                        | SEPT9      | 4 | -  | 0.78  |
| 698 | M0QZC5   | 40S ribosomal protein S11                                                                                                                                                                                                                                       | RPS11      | 4 | -  | 0.777 |
| 699 | B4E2V5   | Erythrocyte band 7 integral membrane protein                                                                                                                                                                                                                    | STOM       | 4 | -  | 0.774 |
| 700 | O95834   | Echinoderm microtubule-associated protein-like 2                                                                                                                                                                                                                | EML2       | 4 | -  | 0.771 |
| 701 | O75368   | SH3 domain-binding glutamic acid-rich-like protein                                                                                                                                                                                                              | SH3BGRL    | 4 | -  | 0.758 |
| 702 | F8W1Q3   | Biotinidase                                                                                                                                                                                                                                                     | BTD        | 4 | +  | 0.753 |
| 703 | P55145   | Mesencephalic astrocyte-derived neurotrophic factor                                                                                                                                                                                                             | MANF       | 4 | +  | 0.75  |
| 704 | C9J0J7   | Profilin-2;Profilin                                                                                                                                                                                                                                             | PFN2       | 4 | -  | 0.743 |
| 705 | C9J712   | Profilin-2                                                                                                                                                                                                                                                      | PFN2       | 4 | -  | 0.737 |
| 706 | Q15758   | Neutral amino acid transporter B(0)                                                                                                                                                                                                                             | SLC1A5     | 4 | -  | 0.734 |



|     |          |                                                                                                                                                                                     |                     |   |   |       |
|-----|----------|-------------------------------------------------------------------------------------------------------------------------------------------------------------------------------------|---------------------|---|---|-------|
| 707 | E7EP32   | Guanine nucleotide-binding protein G(I)/G(S)/G(T) subunit beta-2;Guanine nucleotide-binding protein G(I)/G(S)/G(T) subunit beta-1;Guanine nucleotide-binding protein subunit beta-4 | GNB2;GNB1;GNB4      | 4 | - | 0.727 |
| 708 | P37235   | Hippocalcin-like protein 1;Neuron-specific calcium-binding protein hippocalcin                                                                                                      | HPCAL1;HPCA         | 4 | - | 0.725 |
| 709 | Q9Y2I2-2 | Netrin-G1                                                                                                                                                                           | NTNG1               | 4 | + | 0.716 |
| 710 | P04066   | Tissue alpha-L-fucosidase                                                                                                                                                           | FUCA1               | 4 | + | 0.708 |
| 711 | P05161   | Ubiquitin-like protein ISG15                                                                                                                                                        | ISG15               | 4 | - | 0.702 |
| 712 | P00750-4 | Tissue-type plasminogen activator;Tissue-type plasminogen activator chain A;Tissue-type plasminogen activator chain B                                                               | PLAT                | 4 | - | 0.694 |
| 713 | Q8N474   | Secreted frizzled-related protein 1                                                                                                                                                 | SFRP1               | 4 | + | 0.692 |
| 714 | F5GY37   | Prohibitin-2                                                                                                                                                                        | PHB2                | 4 | - | 0.686 |
| 715 | F8VZJ2   | Nascent polypeptide-associated complex subunit alpha                                                                                                                                | NACA                | 4 | - | 0.681 |
| 716 | P13497-4 | Bone morphogenetic protein 1                                                                                                                                                        | BMP1                | 4 | + | 0.677 |
| 717 | E5RIW3   | Tubulin-specific chaperone A                                                                                                                                                        | TBCA                | 4 | - | 0.676 |
| 718 | P24592   | Insulin-like growth factor-binding protein 6                                                                                                                                        | IGFBP6              | 4 | + | 0.675 |
| 719 | O75828   | Carbonyl reductase [NADPH] 3                                                                                                                                                        | CBR3                | 4 | - | 0.674 |
| 720 | Q8TBC4-2 | NEDD8-activating enzyme E1 catalytic subunit                                                                                                                                        | UBA3                | 4 | - | 0.664 |
| 721 | P62244   | 40S ribosomal protein S15a                                                                                                                                                          | RPS15A              | 4 | - | 0.663 |
| 722 | Q9UKU9   | Angiopoietin-related protein 2                                                                                                                                                      | ANGPTL2             | 4 | + | 0.66  |
| 723 | Q9Y547   | Heat shock protein beta-11                                                                                                                                                          | HSPB11              | 4 | - | 0.652 |
| 724 | M0R0Y2   | Alpha-soluble NSF attachment protein                                                                                                                                                | NAPA                | 4 | - | 0.649 |
| 725 | Q9UNF0-2 | Protein kinase C and casein kinase substrate in neurons protein 2                                                                                                                   | PACSIN2             | 4 | - | 0.647 |
| 726 | P04899   | Guanine nucleotide-binding protein G(i) subunit alpha-2                                                                                                                             | GNAI2               | 4 | - | 0.629 |
| 727 | Q9Y3A5   | Ribosome maturation protein SBDS                                                                                                                                                    | SBDS                | 4 | - | 0.627 |
| 728 | Q96CN7   | Isochorismatase domain-containing protein 1                                                                                                                                         | ISOC1               | 4 | - | 0.616 |
| 729 | P61353   | 60S ribosomal protein L27                                                                                                                                                           | RPL27               | 4 | - | 0.612 |
| 730 | Q96FQ6   | Protein S100-A16                                                                                                                                                                    | S100A16             | 4 | - | 0.609 |
| 731 | P62701   | 40S ribosomal protein S4, X isoform;40S ribosomal protein S4, Y isoform 1;40S ribosomal protein S4, Y isoform 2                                                                     | RPS4X;RPS4Y1;RPS4Y2 | 4 | - | 0.606 |
| 732 | O95865   | N(G),N(G)-dimethylarginine dimethylaminohydrolase 2                                                                                                                                 | DDAH2               | 4 | - | 0.598 |
| 733 | Q71UI9   | Histone H2A.V;Histone H2A.Z;Histone H2A                                                                                                                                             | H2AFV;H2AFZ         | 4 | - | 0.593 |
| 734 | O00764-2 | Pyridoxal kinase                                                                                                                                                                    | PDXK                | 4 | - | 0.59  |
| 735 | H0Y8L7   | 40S ribosomal protein S3a                                                                                                                                                           | RPS3A               | 4 | - | 0.589 |
| 736 | P06132   | Uroporphyrinogen decarboxylase                                                                                                                                                      | UROD                | 4 | - | 0.588 |
| 737 | P56537   | Eukaryotic translation initiation factor 6                                                                                                                                          | EIF6                | 4 | - | 0.584 |
| 738 | O00505   | Importin subunit alpha-4                                                                                                                                                            | KPNA3               | 4 | - | 0.578 |
| 739 | Q86X55-2 | Histone-arginine methyltransferase CARM1                                                                                                                                            | CARM1               | 4 | - | 0.577 |

|     |          |                                                                                                                    |             |   |   |       |
|-----|----------|--------------------------------------------------------------------------------------------------------------------|-------------|---|---|-------|
| 740 | P52788-2 | Spermine synthase                                                                                                  | SMS         | 4 | - | 0.575 |
| 741 | P61604   | 10 kDa heat shock protein, mitochondrial                                                                           | HSPE1       | 4 | - | 0.57  |
| 742 | H0Y6E7   | RNA-binding motif protein, X chromosome;RNA-binding motif protein, X chromosome, N-terminally processed            | RBMX        | 4 | - | 0.566 |
| 743 | P12004   | Proliferating cell nuclear antigen                                                                                 | PCNA        | 4 | - | 0.566 |
| 744 | O00629   | Importin subunit alpha-3                                                                                           | KPNA4       | 4 | - | 0.564 |
| 745 | C9J3R8   | Beta-1,4-galactosyltransferase 4;N-acetyllactosamine synthase;Lactotriaosylceramide beta-1,4-galactosyltransferase | B4GALT4     | 4 | + | 0.563 |
| 746 | P98155-2 | Very low-density lipoprotein receptor                                                                              | VLDLR       | 4 | + | 0.562 |
| 747 | G3V158   | Putative deoxyribose-phosphate aldolase                                                                            | DERA        | 4 | - | 0.561 |
| 748 | H0YD13   | CD44 antigen                                                                                                       | CD44        | 4 | + | 0.556 |
| 749 | P48147   | Prolyl endopeptidase                                                                                               | PREP        | 4 | - | 0.543 |
| 750 | Q00688   | Peptidyl-prolyl cis-trans isomerase FKBP3                                                                          | FKBP3       | 4 | - | 0.534 |
| 751 | O95777   | N-alpha-acetyltransferase 38, NatC auxiliary subunit                                                               | NAA38       | 4 | - | 0.532 |
| 752 | Q9BUL8   | Programmed cell death protein 10                                                                                   | PDCD10      | 4 | - | 0.53  |
| 753 | A8MQ58   | Inactive serine protease PAMR1                                                                                     | PAMR1       | 4 | + | 0.527 |
| 754 | P08754   | Guanine nucleotide-binding protein G(k) subunit alpha                                                              | GNAI3       | 4 | - | 0.527 |
| 755 | Q08397   | Lysyl oxidase homolog 1                                                                                            | LOXL1       | 4 | + | 0.524 |
| 756 | H7C488   | Leucine zipper transcription factor-like protein 1                                                                 | LZTFL1      | 4 | - | 0.511 |
| 757 | Q9BRF8-2 | Calcineurin-like phosphoesterase domain-containing protein 1                                                       | CPPED1      | 4 | - | 0.507 |
| 758 | C9JXC1   | Ribonucleoside-diphosphate reductase subunit M2                                                                    | RRM2        | 4 | - | 0.503 |
| 759 | Q92466   | DNA damage-binding protein 2                                                                                       | DDB2        | 4 | - | 0.502 |
| 760 | A6NDG6   | Phosphoglycolate phosphatase                                                                                       | PGP         | 4 | - | 0.49  |
| 761 | P49189   | 4-trimethylaminobutyraldehyde dehydrogenase                                                                        | ALDH9A1     | 4 | - | 0.49  |
| 762 | Q9NX46   | Poly(ADP-ribose) glycohydrolase ARH3                                                                               | ADPRHL2     | 4 | - | 0.481 |
| 763 | P30046   | D-dopachrome decarboxylase;D-dopachrome decarboxylase-like protein                                                 | DDT;DDTL    | 4 | - | 0.479 |
| 764 | B4DDF4   | Calponin-2                                                                                                         | CNN2        | 4 | - | 0.476 |
| 765 | P52597   | Heterogeneous nuclear ribonucleoprotein F;Heterogeneous nuclear ribonucleoprotein F, N-terminally processed        | HNRNPF      | 4 | - | 0.475 |
| 766 | P46108   | Adapter molecule crk                                                                                               | CRK         | 4 | - | 0.467 |
| 767 | P61457   | Pterin-4-alpha-carbinolamine dehydratase                                                                           | PCBD1       | 4 | - | 0.461 |
| 768 | P62269   | 40S ribosomal protein S18                                                                                          | RPS18       | 4 | - | 0.459 |
| 769 | P55263-4 | Adenosine kinase                                                                                                   | ADK         | 4 | - | 0.446 |
| 770 | Q96RS6-3 | NudC domain-containing protein 1                                                                                   | NUDCD1      | 4 | - | 0.44  |
| 771 | Q9H1B5   | Xylosyltransferase 2                                                                                               | XYLT2       | 4 | + | 0.431 |
| 772 | Q99598   | Translin-associated protein X                                                                                      | TSNAX;DISC1 | 4 | - | 0.419 |

|     |          |                                                                                                                                                                                                                                                           |                       |   |   |       |
|-----|----------|-----------------------------------------------------------------------------------------------------------------------------------------------------------------------------------------------------------------------------------------------------------|-----------------------|---|---|-------|
| 773 | P67775   | Serine/threonine-protein phosphatase 2A catalytic subunit alpha isoform;Serine/threonine-protein phosphatase 2A catalytic subunit beta isoform                                                                                                            | PPP2CA;PPP2CB         | 4 | - | 0.419 |
| 774 | P62750   | 60S ribosomal protein L23a                                                                                                                                                                                                                                | RPL23A                | 4 | - | 0.418 |
| 775 | Q15717   | ELAV-like protein 1                                                                                                                                                                                                                                       | ELAVL1                | 4 | - | 0.415 |
| 776 | Q99798   | Aconitate hydratase, mitochondrial                                                                                                                                                                                                                        | ACO2                  | 4 | - | 0.413 |
| 777 | O75663   | TIP41-like protein                                                                                                                                                                                                                                        | TIPRL                 | 4 | - | 0.409 |
| 778 | P04040   | Catalase                                                                                                                                                                                                                                                  | CAT                   | 4 | - | 0.406 |
| 779 | O43776   | Asparagine--tRNA ligase, cytoplasmic                                                                                                                                                                                                                      | NARS                  | 4 | - | 0.406 |
| 780 | Q9BQT9   | Calsyntenin-3                                                                                                                                                                                                                                             | CLSTN3                | 4 | + | 0.404 |
| 781 | P62820   | Ras-related protein Rab-1A;Putative Ras-related protein Rab-1C                                                                                                                                                                                            | RAB1A;RAB1B;<br>RAB1C | 4 | - | 0.397 |
| 782 | P0C0L4-2 | Complement C4-A;Complement C4 beta chain;Complement C4-A alpha chain;C4a anaphylatoxin;C4b-A;C4d-A;Complement C4 gamma chain;Complement C4-B;Complement C4 beta chain;Complement C4-B alpha chain;C4a anaphylatoxin;C4b-B;C4d-B;Complement C4 gamma chain | C4A;C4B               | 4 | + | 0.393 |
| 783 | P11279   | Lysosome-associated membrane glycoprotein 1                                                                                                                                                                                                               | LAMP1                 | 4 | + | 0.388 |
| 784 | P02792   | Ferritin light chain                                                                                                                                                                                                                                      | FTL                   | 4 | - | 0.383 |
| 785 | Q99584   | Protein S100-A13                                                                                                                                                                                                                                          | S100A13               | 4 | - | 0.369 |
| 786 | Q9UBT2   | SUMO-activating enzyme subunit 2                                                                                                                                                                                                                          | UBA2                  | 4 | - | 0.367 |
| 787 | Q92905   | COP9 signalosome complex subunit 5                                                                                                                                                                                                                        | COPS5                 | 4 | - | 0.364 |
| 788 | P30530-2 | Tyrosine-protein kinase receptor UFO                                                                                                                                                                                                                      | AXL                   | 4 | + | 0.363 |
| 789 | Q15691   | Microtubule-associated protein RP/EB family member 1                                                                                                                                                                                                      | MAPRE1                | 4 | - | 0.356 |
| 790 | F8W717   | Echinoderm microtubule-associated protein-like 1                                                                                                                                                                                                          | EML1                  | 4 | - | 0.336 |
| 791 | A3KFL4   | Exosome complex component RRP4                                                                                                                                                                                                                            | EXOSC2                | 4 | - | 0.33  |
| 792 | C9JBI3   | Phosphoserine phosphatase                                                                                                                                                                                                                                 | PSPH                  | 4 | - | 0.328 |
| 793 | Q92499   | ATP-dependent RNA helicase DDX1                                                                                                                                                                                                                           | DDX1                  | 4 | - | 0.324 |
| 794 | Q7L1Q6-2 | Basic leucine zipper and W2 domain-containing protein 1                                                                                                                                                                                                   | BZW1                  | 4 | - | 0.321 |
| 795 | G3V4F2   | Acyl-coenzyme A thioesterase 1;Acyl-coenzyme A thioesterase 2, mitochondrial                                                                                                                                                                              | ACOT1;ACOT2           | 4 | - | 0.317 |
| 796 | O14579   | Coatamer subunit epsilon                                                                                                                                                                                                                                  | COPE                  | 4 | - | 0.295 |
| 797 | B7Z2C3   | Protein phosphatase 1F                                                                                                                                                                                                                                    | PPM1F                 | 4 | - | 0.291 |
| 798 | G3V4C6   | UPF0568 protein C14orf166                                                                                                                                                                                                                                 | C14orf166             | 4 | - | 0.273 |
| 799 | P18124   | 60S ribosomal protein L7                                                                                                                                                                                                                                  | RPL7                  | 4 | - | 0.256 |
| 800 | O95347-2 | Structural maintenance of chromosomes protein 2                                                                                                                                                                                                           | SMC2                  | 4 | - | 0.23  |
| 801 | O15143   | Actin-related protein 2/3 complex subunit 1B                                                                                                                                                                                                              | ARPC1B                | 4 | - | 0.222 |
| 802 | Q6EMK4   | Vasorin                                                                                                                                                                                                                                                   | VASN                  | 4 | + | 0.216 |
| 803 | Q14CX7   | N-alpha-acetyltransferase 25, NatB auxiliary subunit                                                                                                                                                                                                      | NAA25                 | 4 | - | 0.213 |

|     |          |                                                                                                                                                                                                                                                                            |                   |   |    |       |
|-----|----------|----------------------------------------------------------------------------------------------------------------------------------------------------------------------------------------------------------------------------------------------------------------------------|-------------------|---|----|-------|
| 804 | Q9NPD3   | Exosome complex component RRP41                                                                                                                                                                                                                                            | EXOSC4            | 4 | -  | 0.212 |
| 805 | Q76M96   | Coiled-coil domain-containing protein 80                                                                                                                                                                                                                                   | CCDC80            | 4 | +  | 0.206 |
| 806 | P30457   | HLA class I histocompatibility antigen, A-66 alpha chain;HLA class I histocompatibility antigen, A-34 alpha chain;HLA class I histocompatibility antigen, A-26 alpha chain;HLA class I histocompatibility antigen, A-25 alpha chain;HLA class I histocompatibility antigen | HLA-A             | 4 | +  | 0.192 |
| 807 | HOYDU8   | Serine/threonine-protein phosphatase;Serine/threonine-protein phosphatase 5                                                                                                                                                                                                | PPP5C             | 4 | -  | 0.191 |
| 808 | E9PRH9   | Nuclear autoantigenic sperm protein                                                                                                                                                                                                                                        | NASP              | 4 | -  | 0.146 |
| 809 | P27824   | Calnexin                                                                                                                                                                                                                                                                   | CANX              | 4 | +  | 0.127 |
| 810 | Q95604   | HLA class I histocompatibility antigen, Cw-17 alpha chain                                                                                                                                                                                                                  | HLA-C             | 4 | +  | 0.12  |
| 811 | Q96C19   | EF-hand domain-containing protein D2                                                                                                                                                                                                                                       | EFHD2             | 4 | -  | 0.097 |
| 812 | P30508   | HLA class I histocompatibility antigen, Cw-12 alpha chain;HLA class I histocompatibility antigen, Cw-16 alpha chain;HLA class I histocompatibility antigen, Cw-14 alpha chain;HLA class I histocompatibility antigen, Cw-4 alpha chain                                     | HLA-C             | 4 | +  | 0.092 |
| 813 | P08572   | Collagen alpha-2(IV) chain;Canstatin                                                                                                                                                                                                                                       | COL4A2            | 4 | +  | 0.068 |
| 814 | X6RA14   | S-formylglutathione hydrolase                                                                                                                                                                                                                                              | ESD               | 4 | NA | NA    |
| 815 | P22105-3 | Tenascin-X                                                                                                                                                                                                                                                                 | TNXB              | 4 | NA | NA    |
| 816 | P17900   | Ganglioside GM2 activator;Ganglioside GM2 activator isoform short                                                                                                                                                                                                          | GM2A              | 3 | +  | 0.945 |
| 817 | Q9UNN8   | Endothelial protein C receptor                                                                                                                                                                                                                                             | PROCR             | 3 | +  | 0.916 |
| 818 | Q9GZM7-3 | Tubulointerstitial nephritis antigen-like                                                                                                                                                                                                                                  | TINAGL1           | 3 | +  | 0.914 |
| 819 | P62316   | Small nuclear ribonucleoprotein Sm D2                                                                                                                                                                                                                                      | SNRPD2            | 3 | -  | 0.914 |
| 820 | P62081   | 40S ribosomal protein S7                                                                                                                                                                                                                                                   | RPS7              | 3 | -  | 0.905 |
| 821 | P61224-2 | Ras-related protein Rap-1b;Ras-related protein Rap-1A;Ras-related protein Rap-1b-like protein                                                                                                                                                                              | RAP1B;RAP1A       | 3 | -  | 0.891 |
| 822 | P61812   | Transforming growth factor beta-2;Latency-associated peptide                                                                                                                                                                                                               | TGFB2             | 3 | +  | 0.887 |
| 823 | P30044-2 | Peroxisomal protein 5, mitochondrial                                                                                                                                                                                                                                       | PRDX5             | 3 | -  | 0.885 |
| 824 | V9GZ55   | Proteasome assembly chaperone 2                                                                                                                                                                                                                                            | PSMG2             | 3 | -  | 0.866 |
| 825 | P51148   | Ras-related protein Rab-5C;Ras-related protein Rab-5B;Ras-related protein Rab-5A                                                                                                                                                                                           | RAB5C;RAB5B;RAB5A | 3 | -  | 0.865 |
| 826 | Q9UBR2   | Cathepsin Z                                                                                                                                                                                                                                                                | CTSZ              | 3 | +  | 0.861 |
| 827 | P30084   | Enoyl-CoA hydratase, mitochondrial                                                                                                                                                                                                                                         | ECHS1             | 3 | -  | 0.855 |
| 828 | P16035   | Metalloproteinase inhibitor 2                                                                                                                                                                                                                                              | TIMP2             | 3 | +  | 0.854 |
| 829 | P31949   | Protein S100-A11                                                                                                                                                                                                                                                           | S100A11           | 3 | -  | 0.839 |
| 830 | P62277   | 40S ribosomal protein S13                                                                                                                                                                                                                                                  | RPS13             | 3 | -  | 0.816 |
| 831 | P13674-3 | Prolyl 4-hydroxylase subunit alpha-1                                                                                                                                                                                                                                       | P4HA1             | 3 | +  | 0.806 |
| 832 | Q9UHL4   | Dipeptidyl peptidase 2                                                                                                                                                                                                                                                     | DPP7              | 3 | +  | 0.805 |

|     |          |                                                                                                                                            |                                                        |   |   |       |
|-----|----------|--------------------------------------------------------------------------------------------------------------------------------------------|--------------------------------------------------------|---|---|-------|
| 833 | Q16790   | Carbonic anhydrase 9                                                                                                                       | CA9                                                    | 3 | + | 0.804 |
| 834 | Q96CX2   | BTB/POZ domain-containing protein KCTD12                                                                                                   | KCTD12                                                 | 3 | - | 0.791 |
| 835 | C9J0K6   | Sorcin                                                                                                                                     | SRI                                                    | 3 | - | 0.786 |
| 836 | O00748   | Cocaine esterase                                                                                                                           | CES2                                                   | 3 | + | 0.784 |
| 837 | H7C4X4   | Target of Nesh-SH3                                                                                                                         | ABI3BP;<br>DKFZp667H216                                | 3 | - | 0.784 |
| 838 | Q8IV08   | Phospholipase D3                                                                                                                           | PLD3                                                   | 3 | - | 0.779 |
| 839 | Q14847   | LIM and SH3 domain protein 1                                                                                                               | LASP1                                                  | 3 | - | 0.776 |
| 840 | P14174   | Macrophage migration inhibitory factor                                                                                                     | MIF                                                    | 3 | - | 0.776 |
| 841 | P08294   | Extracellular superoxide dismutase [Cu-Zn]                                                                                                 | SOD3                                                   | 3 | + | 0.773 |
| 842 | P53634   | Dipeptidyl peptidase 1;Dipeptidyl peptidase 1 exclusion domain chain;Dipeptidyl peptidase 1 heavy chain;Dipeptidyl peptidase 1 light chain | CTSC                                                   | 3 | + | 0.767 |
| 843 | Q96DB5-2 | Regulator of microtubule dynamics protein 1                                                                                                | RMDN1                                                  | 3 | + | 0.764 |
| 844 | J3QT28   | Mitotic checkpoint protein BUB3                                                                                                            | BUB3                                                   | 3 | - | 0.76  |
| 845 | Q9BXJ1   | Complement C1q tumor necrosis factor-related protein 1                                                                                     | C1QTNF1                                                | 3 | + | 0.757 |
| 846 | K7EJ74   | 116 kDa U5 small nuclear ribonucleoprotein component                                                                                       | EFTUD2                                                 | 3 | - | 0.754 |
| 847 | Q15642-5 | Cdc42-interacting protein 4                                                                                                                | TRIP10                                                 | 3 | - | 0.745 |
| 848 | P19957   | Elafin                                                                                                                                     | PI3                                                    | 3 | + | 0.744 |
| 849 | P04792   | Heat shock protein beta-1                                                                                                                  | HSPB1                                                  | 3 | - | 0.74  |
| 850 | Q9UM22-3 | Mammalian ependymin-related protein 1                                                                                                      | EPDR1;UCC1                                             | 3 | - | 0.735 |
| 851 | F5H325   | N-acetylgalactosamine-6-sulfatase                                                                                                          | GALNS                                                  | 3 | + | 0.729 |
| 852 | E7ESP4   | Integrin alpha-2                                                                                                                           | ITGA2                                                  | 3 | + | 0.727 |
| 853 | A2ACR1   | Proteasome subunit beta type;Proteasome subunit beta type-9                                                                                | PSMB9                                                  | 3 | - | 0.723 |
| 854 | P26885   | Peptidyl-prolyl cis-trans isomerase FKBP2                                                                                                  | FKBP2                                                  | 3 | + | 0.722 |
| 855 | K7EK07   | Histone H3;Histone H3.3C;Histone H3.2;Histone H3.1t;Histone H3.3;Histone H3.1                                                              | H3F3B;H3F3C;HIST2H3A;HIST2H3PS2;HIST3H3;H3F3A;HIST1H3A | 3 | - | 0.718 |
| 856 | P06280   | Alpha-galactosidase A                                                                                                                      | GLA                                                    | 3 | + | 0.713 |
| 857 | E9PP31   | Caprin-1                                                                                                                                   | CAPRIN1                                                | 3 | - | 0.712 |
| 858 | Q9NPR2-2 | Semaphorin-4B                                                                                                                              | SEMA4B                                                 | 3 | + | 0.709 |
| 859 | R4GN98   | Protein S100-A6                                                                                                                            | S100A6                                                 | 3 | - | 0.709 |
| 860 | Q15274   | Nicotinate-nucleotide pyrophosphorylase [carboxylating]                                                                                    | QPRT                                                   | 3 | + | 0.707 |
| 861 | P38919   | Eukaryotic initiation factor 4A-III;Eukaryotic initiation factor 4A-III, N-terminally processed                                            | EIF4A3                                                 | 3 | - | 0.698 |
| 862 | O95479   | GDH/6PGL endoplasmic bifunctional protein;Glucose 1-dehydrogenase;6-phosphogluconolactonase                                                | H6PD                                                   | 3 | + | 0.691 |

|     |          |                                                                                                                                          |          |   |   |       |
|-----|----------|------------------------------------------------------------------------------------------------------------------------------------------|----------|---|---|-------|
| 863 | P62263   | 40S ribosomal protein S14                                                                                                                | RPS14    | 3 | - | 0.691 |
| 864 | C9JZD1   | Actin-related protein 2/3 complex subunit 3                                                                                              | ARPC3    | 3 | - | 0.687 |
| 865 | P33316-2 | Deoxyuridine 5-triphosphate nucleotidohydrolase, mitochondrial                                                                           | DUT      | 3 | - | 0.686 |
| 866 | O15511   | Actin-related protein 2/3 complex subunit 5                                                                                              | ARPC5    | 3 | - | 0.684 |
| 867 | H3BPK3   | Hydroxyacylglutathione hydrolase, mitochondrial                                                                                          | HAGH     | 3 | - | 0.682 |
| 868 | H0Y630   | Serine/threonine-protein kinase 24;Serine/threonine-protein kinase 24 36 kDa subunit;Serine/threonine-protein kinase 24 12 kDa subunit   | STK24    | 3 | - | 0.68  |
| 869 | P53999   | Activated RNA polymerase II transcriptional coactivator p15                                                                              | SUB1     | 3 | - | 0.671 |
| 870 | P46783   | 40S ribosomal protein S10                                                                                                                | RPS10    | 3 | - | 0.659 |
| 871 | Q96AG4   | Leucine-rich repeat-containing protein 59                                                                                                | LRRC59   | 3 | - | 0.655 |
| 872 | P00441   | Superoxide dismutase [Cu-Zn]                                                                                                             | SOD1     | 3 | - | 0.648 |
| 873 | Q9Y646   | Carboxypeptidase Q                                                                                                                       | CPQ      | 3 | + | 0.646 |
| 874 | P53680-2 | AP-2 complex subunit sigma                                                                                                               | AP2S1    | 3 | - | 0.645 |
| 875 | P28300   | Protein-lysine 6-oxidase                                                                                                                 | LOX      | 3 | + | 0.638 |
| 876 | P23919-2 | Thymidylate kinase                                                                                                                       | DTYMK    | 3 | - | 0.629 |
| 877 | P61970   | Nuclear transport factor 2                                                                                                               | NUTF2    | 3 | - | 0.625 |
| 878 | P46109   | Crk-like protein                                                                                                                         | CRKL     | 3 | - | 0.624 |
| 879 | P63092-3 | Guanine nucleotide-binding protein G(s) subunit alpha isoforms short;Guanine nucleotide-binding protein G(s) subunit alpha isoforms XLas | GNAS     | 3 | - | 0.624 |
| 880 | Q07021   | Complement component 1 Q subcomponent-binding protein, mitochondrial                                                                     | C1QBP    | 3 | + | 0.622 |
| 881 | Q9Y570-2 | Protein phosphatase methylesterase 1                                                                                                     | PPME1    | 3 | - | 0.62  |
| 882 | Q9BZM5   | NKG2D ligand 2                                                                                                                           | ULBP2    | 3 | + | 0.617 |
| 883 | Q07812-5 | Apoptosis regulator BAX                                                                                                                  | BAX      | 3 | - | 0.617 |
| 884 | Q16401-2 | 26S proteasome non-ATPase regulatory subunit 5                                                                                           | PSMD5    | 3 | - | 0.614 |
| 885 | Q9NPH3-3 | Interleukin-1 receptor accessory protein                                                                                                 | IL1RAP   | 3 | + | 0.604 |
| 886 | Q9NR45   | Sialic acid synthase                                                                                                                     | NANS     | 3 | - | 0.602 |
| 887 | O76061   | Stanniocalcin-2                                                                                                                          | STC2     | 3 | + | 0.601 |
| 888 | P49257   | Protein ERGIC-53                                                                                                                         | LMAN1    | 3 | + | 0.589 |
| 889 | Q9UHV9   | Prefoldin subunit 2                                                                                                                      | PFDN2    | 3 | - | 0.583 |
| 890 | P21281   | V-type proton ATPase subunit B, brain isoform                                                                                            | ATP6V1B2 | 3 | - | 0.579 |
| 891 | K7ES02   | Bleomycin hydrolase                                                                                                                      | BLMH     | 3 | - | 0.573 |
| 892 | P13489   | Ribonuclease inhibitor                                                                                                                   | RNH1     | 3 | - | 0.568 |
| 893 | P49419-2 | Alpha-aminoadipic semialdehyde dehydrogenase                                                                                             | ALDH7A1  | 3 | - | 0.567 |
| 894 | P28072   | Proteasome subunit beta type-6                                                                                                           | PSMB6    | 3 | - | 0.563 |
| 895 | P24534   | Elongation factor 1-beta                                                                                                                 | EEF1B2   | 3 | - | 0.562 |
| 896 | O43765   | Small glutamine-rich tetratricopeptide repeat-containing protein alpha                                                                   | SGTA     | 3 | - | 0.549 |
| 897 | C9J6N9   | Ubiquitin fusion degradation protein 1 homolog                                                                                           | UFD1L    | 3 | - | 0.549 |

|     |          |                                                                                                                           |                       |   |   |       |
|-----|----------|---------------------------------------------------------------------------------------------------------------------------|-----------------------|---|---|-------|
| 898 | P06756-3 | Integrin alpha-V;Integrin alpha-V heavy chain;Integrin alpha-V light chain                                                | ITGAV                 | 3 | + | 0.549 |
| 899 | B3KQC5   | Endoplasmic reticulum mannosyl-oligosaccharide 1,2-alpha-mannosidase                                                      | MAN1B1                | 3 | - | 0.546 |
| 900 | P62195-2 | 26S protease regulatory subunit 8                                                                                         | PSMC5                 | 3 | - | 0.542 |
| 901 | Q00888-2 | Pregnancy-specific beta-1-glycoprotein 4;Pregnancy-specific beta-1-glycoprotein 5                                         | PSG4;PSG5             | 3 | + | 0.54  |
| 902 | C9JP16   | Cartilage-associated protein                                                                                              | CRTAP                 | 3 | + | 0.539 |
| 903 | Q8IXB1   | DnaJ homolog subfamily C member 10                                                                                        | DNAJC10               | 3 | - | 0.516 |
| 904 | P40306   | Proteasome subunit beta type-10                                                                                           | PSMB10                | 3 | - | 0.515 |
| 905 | Q9BR76   | Coronin-1B;Coronin                                                                                                        | CORO1B                | 3 | - | 0.508 |
| 906 | K7ER96   | Thioredoxin-like protein 1                                                                                                | TXNL1                 | 3 | - | 0.508 |
| 907 | E7ERV9   | Acid ceramidase;Acid ceramidase subunit alpha;Acid ceramidase subunit beta                                                | ASAH1                 | 3 | - | 0.504 |
| 908 | Q9Y376   | Calcium-binding protein 39                                                                                                | CAB39                 | 3 | - | 0.501 |
| 909 | P62851   | 40S ribosomal protein S25                                                                                                 | RPS25                 | 3 | - | 0.499 |
| 910 | Q5VWZ2   | Lysophospholipase-like protein 1                                                                                          | LYPLAL1               | 3 | - | 0.498 |
| 911 | Q13283   | Ras GTPase-activating protein-binding protein 1                                                                           | G3BP1                 | 3 | - | 0.496 |
| 912 | Q9BRA2   | Thioredoxin domain-containing protein 17                                                                                  | TXNDC17               | 3 | - | 0.491 |
| 913 | Q07960   | Rho GTPase-activating protein 1                                                                                           | ARHGAP1               | 3 | - | 0.48  |
| 914 | P02787   | Serotransferrin                                                                                                           | TF                    | 3 | + | 0.478 |
| 915 | A6PVN6   | Serine/threonine-protein phosphatase 2A activator                                                                         | PPP2R4                | 3 | - | 0.476 |
| 916 | P35637-2 | RNA-binding protein FUS;TATA-binding protein-associated factor 2N                                                         | FUS;TAF15             | 3 | - | 0.471 |
| 917 | Q14393-5 | Growth arrest-specific protein 6                                                                                          | GAS6                  | 3 | - | 0.469 |
| 918 | P40261   | Nicotinamide N-methyltransferase                                                                                          | NNMT                  | 3 | - | 0.469 |
| 919 | O15355   | Protein phosphatase 1G                                                                                                    | PPM1G                 | 3 | - | 0.463 |
| 920 | O14744-2 | Protein arginine N-methyltransferase 5;Protein arginine N-methyltransferase 5, N-terminally processed                     | PRMT5                 | 3 | - | 0.461 |
| 921 | P24941   | Cyclin-dependent kinase 2;Cyclin-dependent kinase 3                                                                       | CDK2;CDK3             | 3 | - | 0.459 |
| 922 | Q13126   | S-methyl-5-thioadenosine phosphorylase;Purine nucleoside phosphorylase                                                    | MTAP                  | 3 | - | 0.458 |
| 923 | P62913-2 | 60S ribosomal protein L11                                                                                                 | RPL11                 | 3 | - | 0.457 |
| 924 | E9PM69   | 26S protease regulatory subunit 6A                                                                                        | PSMC3                 | 3 | - | 0.454 |
| 925 | Q99985   | Semaphorin-3C                                                                                                             | SEMA3C                | 3 | + | 0.453 |
| 926 | P04181   | Ornithine aminotransferase, mitochondrial;Ornithine aminotransferase, hepatic form;Ornithine aminotransferase, renal form | OAT                   | 3 | + | 0.452 |
| 927 | P14735   | Insulin-degrading enzyme                                                                                                  | IDE                   | 3 | + | 0.449 |
| 928 | G5E9W8   | Glycogenin-1                                                                                                              | GYG1                  | 3 | - | 0.445 |
| 929 | Q03154-2 | Aminoacylase-1                                                                                                            | ACY1;<br>ABHD14A-ACY1 | 3 | - | 0.43  |
| 930 | Q8NCW5-2 | NAD(P)H-hydrate epimerase                                                                                                 | APOA1BP               | 3 | - | 0.425 |
| 931 | Q15024   | Exosome complex component RRP42                                                                                           | EXOSC7                | 3 | - | 0.418 |

|     |          |                                                                                                                                                                                                                  |                                                                                       |   |   |       |
|-----|----------|------------------------------------------------------------------------------------------------------------------------------------------------------------------------------------------------------------------|---------------------------------------------------------------------------------------|---|---|-------|
| 932 | P48506   | Glutamate--cysteine ligase catalytic subunit                                                                                                                                                                     | GCLC                                                                                  | 3 | - | 0.414 |
| 933 | O43747   | AP-1 complex subunit gamma-1                                                                                                                                                                                     | AP1G1                                                                                 | 3 | - | 0.401 |
| 934 | F8VDP4   | CAD protein;Glutamine-dependent carbamoyl-phosphate synthase;Aspartate carbamoyltransferase;Dihydroorotase                                                                                                       | CAD                                                                                   | 3 | - | 0.398 |
| 935 | Q12874   | Splicing factor 3A subunit 3                                                                                                                                                                                     | SF3A3                                                                                 | 3 | - | 0.394 |
| 936 | B4DXP9   | Alpha-centractin                                                                                                                                                                                                 | ACTR1A                                                                                | 3 | - | 0.393 |
| 937 | I3L4H1   | Phosphatidylinositol transfer protein alpha isoform                                                                                                                                                              | PITPNA                                                                                | 3 | - | 0.391 |
| 938 | O75223-3 | Gamma-glutamylcyclotransferase                                                                                                                                                                                   | GGCT                                                                                  | 3 | - | 0.385 |
| 939 | Q9BSJ8   | Extended synaptotagmin-1                                                                                                                                                                                         | ESYT1                                                                                 | 3 | - | 0.382 |
| 940 | P21796   | Voltage-dependent anion-selective channel protein 1                                                                                                                                                              | VDAC1                                                                                 | 3 | - | 0.375 |
| 941 | O76054-5 | SEC14-like protein 2                                                                                                                                                                                             | SEC14L2                                                                               | 3 | - | 0.371 |
| 942 | P11766   | Alcohol dehydrogenase class-3                                                                                                                                                                                    | ADH5                                                                                  | 3 | - | 0.369 |
| 943 | P20290-2 | Transcription factor BTF3                                                                                                                                                                                        | BTF3                                                                                  | 3 | - | 0.364 |
| 944 | Q9Y5S9-2 | RNA-binding protein 8A                                                                                                                                                                                           | RBM8A                                                                                 | 3 | - | 0.36  |
| 945 | Q9UNZ2   | NSFL1 cofactor p47                                                                                                                                                                                               | NSFL1C                                                                                | 3 | - | 0.359 |
| 946 | P07311   | Acylphosphatase-1;Acylphosphatase                                                                                                                                                                                | ACYP1                                                                                 | 3 | - | 0.348 |
| 947 | Q96PD2   | Discoidin, CUB and LCCL domain-containing protein 2                                                                                                                                                              | DCBLD2                                                                                | 3 | - | 0.347 |
| 948 | P61019   | Ras-related protein Rab-2A;Ras-related protein Rab-2B                                                                                                                                                            | RAB2A;RAB2B                                                                           | 3 | - | 0.345 |
| 949 | Q16543   | Hsp90 co-chaperone Cdc37;Hsp90 co-chaperone Cdc37, N-terminally processed                                                                                                                                        | CDC37                                                                                 | 3 | - | 0.342 |
| 950 | P26373   | 60S ribosomal protein L13                                                                                                                                                                                        | RPL13                                                                                 | 3 | - | 0.335 |
| 951 | P04080   | Cystatin-B                                                                                                                                                                                                       | CSTB                                                                                  | 3 | - | 0.333 |
| 952 | E5RHG8   | Transcription elongation factor B polypeptide 1                                                                                                                                                                  | TCEB1                                                                                 | 3 | - | 0.325 |
| 953 | Q99627-2 | COP9 signalosome complex subunit 8                                                                                                                                                                               | COPS8                                                                                 | 3 | - | 0.324 |
| 954 | Q8N257   | Histone H2B type 3-B;Histone H2B type 2-E;Histone H2B type 1-B;Histone H2B type 1-O;Histone H2B type 1-J                                                                                                         | HIST3H2BB;HIST2H2BE;HIST1H2BB;HIST1H2BO;HIST1H2BJ                                     | 3 | - | 0.322 |
| 955 | Q99880   | Histone H2B type 1-L;Histone H2B type 1-M;Histone H2B type 1-N;Histone H2B type 1-H;Histone H2B type 2-F;Histone H2B type 1-C/E/F/G/I;Histone H2B type 1-D;Histone H2B type F-S;Histone H2B type 1-K;Histone H2B | HIST1H2BL;HIST1H2BM;HIST1H2BN;HIST1H2BH;HIST2H2BF;HIST1H2BC;HIST1H2BD;H2BFS;HIST1H2BK | 3 | - | 0.322 |
| 956 | O43570-2 | Carbonic anhydrase 12                                                                                                                                                                                            | CA12                                                                                  | 3 | + | 0.309 |
| 957 | Q14574-2 | Desmocollin-3                                                                                                                                                                                                    | DSC3                                                                                  | 3 | + | 0.301 |
| 958 | Q9BZZ5-3 | Apoptosis inhibitor 5                                                                                                                                                                                            | API5                                                                                  | 3 | - | 0.294 |
| 959 | Q14696   | LDLR chaperone MESD                                                                                                                                                                                              | MESDC2                                                                                | 3 | + | 0.294 |



|     |           |                                                                                                    |                   |   |    |       |
|-----|-----------|----------------------------------------------------------------------------------------------------|-------------------|---|----|-------|
| 960 | Q14008-2  | Cytoskeleton-associated protein 5                                                                  | CKAP5             | 3 | -  | 0.293 |
| 961 | Q92896    | Golgi apparatus protein 1                                                                          | GLG1              | 3 | +  | 0.289 |
| 962 | P05455    | Lupus La protein                                                                                   | SSB               | 3 | -  | 0.266 |
| 963 | Q13442    | 28 kDa heat- and acid-stable phosphoprotein                                                        | PDAP1             | 3 | -  | 0.262 |
| 964 | P43121    | Cell surface glycoprotein MUC18                                                                    | MCAM              | 3 | +  | 0.256 |
| 965 | O00203-3  | AP-3 complex subunit beta-1                                                                        | AP3B1             | 3 | -  | 0.25  |
| 966 | E7ER27    | Peroxisomal multifunctional enzyme type 2;(3R)-hydroxyacyl-CoA dehydrogenase;Enoyl-CoA hydratase 2 | HSD17B4           | 3 | -  | 0.248 |
| 967 | H7C2Y5    | DnaJ homolog subfamily B member 11                                                                 | DNAJB11           | 3 | -  | 0.232 |
| 968 | Q9UMF0    | Intercellular adhesion molecule 5                                                                  | ICAM5             | 3 | +  | 0.227 |
| 969 | Q12996    | Cleavage stimulation factor subunit 3                                                              | CSTF3             | 3 | -  | 0.211 |
| 970 | P09914-2  | Interferon-induced protein with tetratricopeptide repeats 1                                        | IFIT1             | 3 | -  | 0.21  |
| 971 | P12270    | Nucleoprotein TPR                                                                                  | TPR               | 3 | -  | 0.163 |
| 972 | B4E1S6    | Syndecan;Syndecan-4                                                                                | SDC4              | 3 | -  | 0.158 |
| 973 | P04843    | Dolichyl-diphosphooligosaccharide--protein glycosyltransferase subunit 1                           | RPN1              | 3 | +  | 0.151 |
| 974 | Q9BTT0    | Acidic leucine-rich nuclear phosphoprotein 32 family member E                                      | ANP32E            | 3 | -  | 0.128 |
| 975 | Q5T123    | SH3 domain-binding glutamic acid-rich-like protein 3                                               | SH3BGRL3          | 3 | -  | 0.106 |
| 976 | Q9UQE7    | Structural maintenance of chromosomes protein 3                                                    | SMC3              | 3 | -  | 0.103 |
| 977 | P51991-2  | Heterogeneous nuclear ribonucleoprotein A3                                                         | HNRNPA3           | 3 | -  | 0.09  |
| 978 | Q8WZA9    | Immunity-related GTPase family Q protein                                                           | IRGQ              | 3 | -  | 0.086 |
| 979 | Q15459    | Splicing factor 3A subunit 1                                                                       | SF3A1             | 3 | -  | 0.065 |
| 980 | Q32P28-4  | Prolyl 3-hydroxylase 1                                                                             | LEPRE1            | 3 | NA | NA    |
| 981 | P34096    | Ribonuclease 4                                                                                     | RNASE4            | 2 | +  | 0.919 |
| 982 | F5H4U8    | COP9 signalosome complex subunit 7a                                                                | COPS7A            | 2 | -  | 0.913 |
| 983 | C9JXR7    | Caspase-3;Caspase-3 subunit p17;Caspase-3 subunit p12                                              | CASP3             | 2 | -  | 0.899 |
| 984 | P13284    | Gamma-interferon-inducible lysosomal thiol reductase                                               | IFI30             | 2 | +  | 0.895 |
| 985 | Q15121    | Astrocytic phosphoprotein PEA-15                                                                   | PEA15             | 2 | -  | 0.894 |
| 986 | B3KJSJ5   | Meteorin-like protein                                                                              | METRNL            | 2 | -  | 0.891 |
| 987 | P09496-2  | Clathrin light chain A                                                                             | CLTA              | 2 | -  | 0.888 |
| 988 | K7ES20    | Cyclin-dependent kinase inhibitor 2A, isoforms 1/2/3;Cyclin-dependent kinase 4 inhibitor B         | CDKN2A;<br>CDKN2B | 2 | -  | 0.886 |
| 989 | F8WDB9    | Adenylyl cyclase-associated protein;Adenylyl cyclase-associated protein 2                          | CAP2              | 2 | -  | 0.882 |
| 990 | P45877    | Peptidyl-prolyl cis-trans isomerase C                                                              | PPIC              | 2 | +  | 0.878 |
| 991 | P15692-10 | Vascular endothelial growth factor A                                                               | VEGFA             | 2 | +  | 0.878 |
| 992 | F8VVL1    | Density-regulated protein                                                                          | DENR              | 2 | -  | 0.875 |
| 993 | P49459    | Ubiquitin-conjugating enzyme E2 A                                                                  | UBE2A             | 2 | -  | 0.867 |
| 994 | P30050    | 60S ribosomal protein L12                                                                          | RPL12             | 2 | -  | 0.865 |

|      |          |                                                                                                                |                           |   |   |       |
|------|----------|----------------------------------------------------------------------------------------------------------------|---------------------------|---|---|-------|
| 995  | Q15726   | Metastasis-suppressor KiSS-1;Metastin;Kisspeptin-14;Kisspeptin-13;Kisspeptin-10                                | KISS1                     | 2 | + | 0.851 |
| 996  | A6NDF3   | Protein PBDC1                                                                                                  | PBDC1                     | 2 | - | 0.85  |
| 997  | P98179   | Putative RNA-binding protein 3                                                                                 | RBM3                      | 2 | - | 0.845 |
| 998  | F8WDS9   | LanC-like protein 1                                                                                            | LANCL1                    | 2 | - | 0.843 |
| 999  | P15151-3 | Poliovirus receptor                                                                                            | PVR                       | 2 | + | 0.836 |
| 1000 | Q9UMX5   | Neudesin                                                                                                       | NENF                      | 2 | + | 0.834 |
| 1001 | Q9NPD8   | Ubiquitin-conjugating enzyme E2 T                                                                              | UBE2T                     | 2 | - | 0.831 |
| 1002 | Q9UJJ9   | N-acetylglucosamine-1-phosphotransferase subunit gamma                                                         | GNPTG                     | 2 | + | 0.829 |
| 1003 | P20809   | Interleukin-11                                                                                                 | IL11                      | 2 | + | 0.829 |
| 1004 | K7EQA1   | Programmed cell death protein 5                                                                                | PDCD5                     | 2 | - | 0.82  |
| 1005 | F5GX77   | tRNA methyltransferase 112 homolog                                                                             | TRMT112                   | 2 | - | 0.818 |
| 1006 | K7EKL3   | Granulins;Acrogranin;Paragranulin;Granulin-1;Granulin-2;Granulin-3;Granulin-4;Granulin-5;Granulin-6;Granulin-7 | GRN                       | 2 | - | 0.813 |
| 1007 | Q99574   | Neuroserpin                                                                                                    | SERPINI1                  | 2 | + | 0.806 |
| 1008 | Q5TBK7   | Ubiquitin carboxyl-terminal hydrolase isozyme L3                                                               | UCHL3                     | 2 | - | 0.802 |
| 1009 | Q6UW63   | KDEL motif-containing protein 1                                                                                | KDEL1                     | 2 | + | 0.801 |
| 1010 | P50897-2 | Palmitoyl-protein thioesterase 1                                                                               | PPT1                      | 2 | + | 0.799 |
| 1011 | A2A2D0   | Stathmin                                                                                                       | STMN1                     | 2 | - | 0.795 |
| 1012 | Q15056-2 | Eukaryotic translation initiation factor 4H                                                                    | EIF4H                     | 2 | - | 0.794 |
| 1013 | P36639-4 | 7,8-dihydro-8-oxoguanine triphosphatase                                                                        | NUDT1                     | 2 | + | 0.782 |
| 1014 | H7C1Z9   | Peptidyl-prolyl cis-trans isomerase;Peptidyl-prolyl cis-trans isomerase FKBP14                                 | FKBP14                    | 2 | - | 0.774 |
| 1015 | B1AHB2   | DNA replication licensing factor MCM5                                                                          | MCM5                      | 2 | + | 0.772 |
| 1016 | Q9H773   | dCTP pyrophosphatase 1                                                                                         | DCTPP1                    | 2 | - | 0.77  |
| 1017 | E9PES6   | High mobility group protein B3                                                                                 | HMGB3                     | 2 | - | 0.77  |
| 1018 | P60866   | 40S ribosomal protein S20                                                                                      | RPS20                     | 2 | - | 0.769 |
| 1019 | Q99538   | Legumain                                                                                                       | LGMN                      | 2 | + | 0.753 |
| 1020 | M0R0G9   | U1 small nuclear ribonucleoprotein A                                                                           | SNRPA                     | 2 | - | 0.753 |
| 1021 | B4DJP7   | Small nuclear ribonucleoprotein Sm D3                                                                          | SNRPD3                    | 2 | - | 0.749 |
| 1022 | P67870   | Casein kinase II subunit beta                                                                                  | CSNK2B;CSNK2B-LY6G5B-1181 | 2 | - | 0.744 |
| 1023 | Q9H3K6   | Bola-like protein 2                                                                                            | BOLA2;BOLA2B;LOC101060252 | 2 | - | 0.742 |
| 1024 | P61081   | NEDD8-conjugating enzyme Ubc12                                                                                 | UBE2M                     | 2 | - | 0.74  |
| 1025 | O60869-2 | Endothelial differentiation-related factor 1                                                                   | EDF1                      | 2 | - | 0.737 |
| 1026 | E9PJD9   | 60S ribosomal protein L27a                                                                                     | RPL27A                    | 2 | - | 0.736 |
| 1027 | C9JXB8   | 60S ribosomal protein L24                                                                                      | RPL24                     | 2 | - | 0.735 |

|      |          |                                                                                                                                                               |                         |   |   |       |
|------|----------|---------------------------------------------------------------------------------------------------------------------------------------------------------------|-------------------------|---|---|-------|
| 1028 | F5H6I7   | Atlastin-3                                                                                                                                                    | ATL3                    | 2 | - | 0.735 |
| 1029 | O75340-2 | Programmed cell death protein 6                                                                                                                               | PDCD6                   | 2 | - | 0.729 |
| 1030 | Q9BWD1   | Acetyl-CoA acetyltransferase, cytosolic                                                                                                                       | ACAT2                   | 2 | - | 0.726 |
| 1031 | Q53FT3   | Protein Hikeshi                                                                                                                                               | C11orf73                | 2 | - | 0.722 |
| 1032 | P27487   | Dipeptidyl peptidase 4;Dipeptidyl peptidase 4 membrane form;Dipeptidyl peptidase 4 soluble form                                                               | DPP4                    | 2 | + | 0.719 |
| 1033 | Q9Y5Z4-2 | Heme-binding protein 2                                                                                                                                        | HEBP2                   | 2 | - | 0.717 |
| 1034 | D6RAN1   | PDZ and LIM domain protein 7                                                                                                                                  | PDLIM7                  | 2 | - | 0.712 |
| 1035 | P24666-3 | Low molecular weight phosphotyrosine protein phosphatase                                                                                                      | ACP1                    | 2 | - | 0.712 |
| 1036 | Q8WVC2   | 40S ribosomal protein S21                                                                                                                                     | RPS21                   | 2 | - | 0.712 |
| 1037 | P16278-2 | Beta-galactosidase                                                                                                                                            | GLB1                    | 2 | + | 0.711 |
| 1038 | P19876   | C-X-C motif chemokine 3;GRO-gamma(5-73);C-X-C motif chemokine 2;GRO-beta(5-73);Growth-regulated alpha protein;GRO-alpha(4-73);GRO-alpha(5-73);GRO-alpha(6-73) | CXCL3;CXCL2;CXCL1       | 2 | + | 0.709 |
| 1039 | Q9HAV7   | GrpE protein homolog 1, mitochondrial                                                                                                                         | GRPEL1                  | 2 | + | 0.704 |
| 1040 | H0YA68   | Epididymis-specific alpha-mannosidase                                                                                                                         | MAN2B2                  | 2 | + | 0.699 |
| 1041 | O75348   | V-type proton ATPase subunit G 1                                                                                                                              | ATP6V1G1                | 2 | - | 0.698 |
| 1042 | B1AHA8   | Heme oxygenase 1                                                                                                                                              | HMOX1                   | 2 | - | 0.696 |
| 1043 | P30533   | Alpha-2-macroglobulin receptor-associated protein                                                                                                             | LRPAP1                  | 2 | + | 0.693 |
| 1044 | O95486   | Protein transport protein Sec24A                                                                                                                              | SEC24A                  | 2 | - | 0.687 |
| 1045 | O43324   | Eukaryotic translation elongation factor 1 epsilon-1                                                                                                          | EEF1E1;<br>hCG_2043275  | 2 | - | 0.686 |
| 1046 | O75503   | Ceroid-lipofuscinosis neuronal protein 5                                                                                                                      | CLN5                    | 2 | - | 0.683 |
| 1047 | O43399   | Tumor protein D54                                                                                                                                             | TPD52L2                 | 2 | - | 0.68  |
| 1048 | H3BMU8   | Group XV phospholipase A2                                                                                                                                     | PLA2G15                 | 2 | + | 0.674 |
| 1049 | O96007   | Molybdopterin synthase catalytic subunit                                                                                                                      | MOCS2                   | 2 | - | 0.667 |
| 1050 | J3KTJ8   | 60S ribosomal protein L26-like 1;60S ribosomal protein L26                                                                                                    | RPL26;KRBA2;<br>RPL26L1 | 2 | - | 0.666 |
| 1051 | O00241   | Signal-regulatory protein beta-1                                                                                                                              | SIRPB1                  | 2 | + | 0.661 |
| 1052 | P25398   | 40S ribosomal protein S12                                                                                                                                     | RPS12                   | 2 | - | 0.661 |
| 1053 | P49411   | Elongation factor Tu, mitochondrial                                                                                                                           | TUFM                    | 2 | - | 0.661 |
| 1054 | Q86X76-2 | Nitrilase homolog 1                                                                                                                                           | NIT1                    | 2 | - | 0.659 |
| 1055 | B7Z3I9   | Delta-aminolevulinic acid dehydratase                                                                                                                         | ALAD                    | 2 | - | 0.656 |
| 1056 | B4DMV3   | Isoamyl acetate-hydrolyzing esterase 1 homolog                                                                                                                | IAH1                    | 2 | - | 0.649 |
| 1057 | D6REQ6   | Ribonuclease T2                                                                                                                                               | RNASET2                 | 2 | - | 0.648 |
| 1058 | C9JB6    | DNA-directed RNA polymerases I, II, and III subunit RPABC3                                                                                                    | POLR2H                  | 2 | - | 0.648 |
| 1059 | P63208   | S-phase kinase-associated protein 1                                                                                                                           | SKP1                    | 2 | - | 0.648 |

|      |          |                                                                                                                                                                                                                                                             |                      |   |   |       |
|------|----------|-------------------------------------------------------------------------------------------------------------------------------------------------------------------------------------------------------------------------------------------------------------|----------------------|---|---|-------|
| 1060 | G3V1E1   | Sphingomyelin phosphodiesterase                                                                                                                                                                                                                             | SMPD1                | 2 | - | 0.644 |
| 1061 | Q15904   | V-type proton ATPase subunit S1                                                                                                                                                                                                                             | ATP6AP1              | 2 | + | 0.637 |
| 1062 | I3L252   | Bifunctional ATP-dependent dihydroxyacetone kinase/FAD-AMP lyase (cyclizing);ATP-dependent dihydroxyacetone kinase;FAD-AMP lyase (cyclizing)                                                                                                                | DAK                  | 2 | - | 0.635 |
| 1063 | F8VXK3   | Carbohydrate sulfotransferase 11                                                                                                                                                                                                                            | CHST11               | 2 | - | 0.628 |
| 1064 | H7C579   | Omega-amidase NIT2                                                                                                                                                                                                                                          | NIT2                 | 2 | - | 0.627 |
| 1065 | P53609-2 | Geranylgeranyl transferase type-1 subunit beta                                                                                                                                                                                                              | PGGT1B               | 2 | - | 0.626 |
| 1066 | Q9UIQ6-3 | Leucyl-cystinyl aminopeptidase;Leucyl-cystinyl aminopeptidase, pregnancy serum form                                                                                                                                                                         | LNPEP                | 2 | - | 0.624 |
| 1067 | Q5TEJ7   | Replication protein A 32 kDa subunit                                                                                                                                                                                                                        | RPA2                 | 2 | - | 0.623 |
| 1068 | F2Z2C0   | Exosome complex exonuclease RRP44                                                                                                                                                                                                                           | DIS3                 | 2 | - | 0.62  |
| 1069 | P43487   | Ran-specific GTPase-activating protein                                                                                                                                                                                                                      | RANBP1               | 2 | - | 0.602 |
| 1070 | Q5JS79   | Peripheral plasma membrane protein CASK                                                                                                                                                                                                                     | CASK                 | 2 | - | 0.599 |
| 1071 | Q9Y333   | U6 snRNA-associated Sm-like protein LSM2                                                                                                                                                                                                                    | LSM2                 | 2 | - | 0.597 |
| 1072 | P62847-2 | 40S ribosomal protein S24                                                                                                                                                                                                                                   | RPS24                | 2 | - | 0.594 |
| 1073 | P24752   | Acetyl-CoA acetyltransferase, mitochondrial                                                                                                                                                                                                                 | ACAT1                | 2 | - | 0.593 |
| 1074 | F2Z2V0   | Copine-1                                                                                                                                                                                                                                                    | CPNE1                | 2 | - | 0.59  |
| 1075 | F5H0F8   | Serine/threonine-protein phosphatase;Serine/threonine-protein phosphatase 2B catalytic subunit alpha isoform;Serine/threonine-protein phosphatase 2B catalytic subunit beta isoform;Serine/threonine-protein phosphatase 2B catalytic subunit gamma isoform | PPP3CB;PPP3CA;PPP3CC | 2 | - | 0.588 |
| 1076 | O15031   | Plexin-B2                                                                                                                                                                                                                                                   | PLXNB2               | 2 | + | 0.588 |
| 1077 | P54802   | Alpha-N-acetylglucosaminidase;Alpha-N-acetylglucosaminidase 82 kDa form;Alpha-N-acetylglucosaminidase 77 kDa form                                                                                                                                           | NAGLU                | 2 | + | 0.583 |
| 1078 | F5H0I2   | Angiopoietin-related protein 4                                                                                                                                                                                                                              | ANGPTL4              | 2 | - | 0.581 |
| 1079 | B4DDF9   | Annexin;Annexin A4                                                                                                                                                                                                                                          | ANXA4                | 2 | - | 0.58  |
| 1080 | B4E351   | Insulin-like growth factor-binding protein 4                                                                                                                                                                                                                | IGFBP4               | 2 | - | 0.576 |
| 1081 | O15498   | Synaptobrevin homolog YKT6                                                                                                                                                                                                                                  | YKT6                 | 2 | - | 0.574 |
| 1082 | P62310   | U6 snRNA-associated Sm-like protein LSM3                                                                                                                                                                                                                    | LSM3                 | 2 | - | 0.566 |
| 1083 | Q8NHP8   | Putative phospholipase B-like 2;Putative phospholipase B-like 2 32 kDa form;Putative phospholipase B-like 2 45 kDa form                                                                                                                                     | PLBD2                | 2 | + | 0.565 |
| 1084 | O60664-4 | Perilipin-3                                                                                                                                                                                                                                                 | PLIN3                | 2 | - | 0.563 |
| 1085 | Q12904   | Aminoacyl tRNA synthase complex-interacting multifunctional protein 1;Endothelial monocyte-activating polypeptide 2                                                                                                                                         | AIMP1                | 2 | - | 0.559 |
| 1086 | Q02413   | Desmoglein-1                                                                                                                                                                                                                                                | DSG1                 | 2 | + | 0.556 |
| 1087 | P19623   | Spermidine synthase                                                                                                                                                                                                                                         | SRM                  | 2 | - | 0.553 |

|      |          |                                                                                             |          |   |   |       |
|------|----------|---------------------------------------------------------------------------------------------|----------|---|---|-------|
| 1088 | Q9NRN7   | L-aminoadipate-semialdehyde dehydrogenase-phosphopantetheinyl transferase                   | AASDHPPT | 2 | - | 0.551 |
| 1089 | O75531   | Barrier-to-autointegration factor;Barrier-to-autointegration factor, N-terminally processed | BANF1    | 2 | - | 0.551 |
| 1090 | Q15365   | Poly(rC)-binding protein 1                                                                  | PCBP1    | 2 | - | 0.549 |
| 1091 | P61964   | WD repeat-containing protein 5                                                              | WDR5     | 2 | - | 0.54  |
| 1092 | O43681   | ATPase ASNA1                                                                                | ASNA1    | 2 | - | 0.538 |
| 1093 | Q8IXL6-2 | Extracellular serine/threonine protein kinase FAM20C                                        | FAM20C   | 2 | - | 0.536 |
| 1094 | E9PDQ8   | Succinyl-CoA ligase [GDP-forming] subunit beta, mitochondrial                               | SUCLG2   | 2 | - | 0.532 |
| 1095 | Q9Y2A7   | Nck-associated protein 1                                                                    | NCKAP1   | 2 | - | 0.529 |
| 1096 | E9PS97   | Alpha-parvin                                                                                | PARVA    | 2 | - | 0.528 |
| 1097 | B1AJY5   | 26S proteasome non-ATPase regulatory subunit 10                                             | PSMD10   | 2 | - | 0.522 |
| 1098 | H0YAK4   | Neurolysin, mitochondrial                                                                   | NLN      | 2 | - | 0.522 |
| 1099 | P62857   | 40S ribosomal protein S28                                                                   | RPS28    | 2 | - | 0.522 |
| 1100 | E9PKL9   | GDP-L-fucose synthase                                                                       | TSTA3    | 2 | - | 0.519 |
| 1101 | Q5TFE4   | 5-nucleotidase domain-containing protein 1                                                  | NT5DC1   | 2 | - | 0.514 |
| 1102 | E7EM64   | COP9 signalosome complex subunit 6                                                          | COPS6    | 2 | - | 0.508 |
| 1103 | H0YBX2   | Putative deoxyribonuclease TATDN1                                                           | TATDN1   | 2 | - | 0.501 |
| 1104 | Q9UBG0   | C-type mannose receptor 2                                                                   | MRC2     | 2 | + | 0.491 |
| 1105 | U3KQE2   | Calpain small subunit 1                                                                     | CAPNS1   | 2 | - | 0.49  |
| 1106 | Q8WXX5   | DnaJ homolog subfamily C member 9                                                           | DNAJC9   | 2 | - | 0.489 |
| 1107 | F8VXB1   | Coatomer subunit zeta-1                                                                     | COPZ1    | 2 | - | 0.479 |
| 1108 | O75367-2 | Core histone macro-H2A.1;Histone H2A                                                        | H2AFY    | 2 | - | 0.474 |
| 1109 | P49902-2 | Cytosolic purine 5-nucleotidase                                                             | NT5C2    | 2 | - | 0.471 |
| 1110 | P68402   | Platelet-activating factor acetylhydrolase IB subunit beta                                  | PAFAH1B2 | 2 | - | 0.47  |
| 1111 | Q96K17-2 | Transcription factor BTF3 homolog 4                                                         | BTF3L4   | 2 | - | 0.465 |
| 1112 | O14929-2 | Histone acetyltransferase type B catalytic subunit                                          | HAT1     | 2 | - | 0.464 |
| 1113 | C9JZU6   | N-alpha-acetyltransferase 50                                                                | NAA50    | 2 | - | 0.462 |
| 1114 | M0R389   | Platelet-activating factor acetylhydrolase IB subunit gamma                                 | PAFAH1B3 | 2 | - | 0.455 |
| 1115 | Q16773-2 | Kynurenine--oxoglutarate transaminase 1                                                     | CCBL1    | 2 | - | 0.451 |
| 1116 | F5GWI4   | Adenosine deaminase                                                                         | ADA      | 2 | - | 0.45  |
| 1117 | F8W0M9   | Secernin-3                                                                                  | SCRN3    | 2 | - | 0.45  |
| 1118 | E9PKZ0   | 60S ribosomal protein L8                                                                    | RPL8     | 2 | - | 0.449 |
| 1119 | P06493   | Cyclin-dependent kinase 1                                                                   | CDK1     | 2 | - | 0.447 |
| 1120 | O75822-2 | Eukaryotic translation initiation factor 3 subunit J                                        | EIF3J    | 2 | - | 0.442 |
| 1121 | E9PE20   | Signal recognition particle 9 kDa protein                                                   | SRP9     | 2 | - | 0.441 |
| 1122 | P80723-2 | Brain acid soluble protein 1                                                                | BASP1    | 2 | - | 0.438 |

|      |          |                                                                                                                                        |                                              |   |   |       |
|------|----------|----------------------------------------------------------------------------------------------------------------------------------------|----------------------------------------------|---|---|-------|
| 1123 | Q4J6C6-4 | Prolyl endopeptidase-like                                                                                                              | PREPL                                        | 2 | - | 0.429 |
| 1124 | Q14643-4 | Inositol 1,4,5-trisphosphate receptor type 1;Inositol 1,4,5-trisphosphate receptor type 2;Inositol 1,4,5-trisphosphate receptor type 3 | ITPR1;ITPR2;ITPR3                            | 2 | - | 0.428 |
| 1125 | O94903   | Proline synthase co-transcribed bacterial homolog protein                                                                              | PROSC                                        | 2 | - | 0.425 |
| 1126 | O43660-2 | Pleiotropic regulator 1                                                                                                                | PLRG1                                        | 2 | - | 0.421 |
| 1127 | Q5JR95   | 40S ribosomal protein S8                                                                                                               | RPS8                                         | 2 | - | 0.419 |
| 1128 | Q9H2H8   | Peptidyl-prolyl cis-trans isomerase-like 3;Peptidyl-prolyl cis-trans isomerase                                                         | PPIL3                                        | 2 | - | 0.418 |
| 1129 | Q6GMV2   | SET and MYND domain-containing protein 5                                                                                               | SMYD5                                        | 2 | - | 0.417 |
| 1130 | O75144   | ICOS ligand                                                                                                                            | ICOSLG                                       | 2 | + | 0.416 |
| 1131 | B4E2S7   | Lysosome-associated membrane glycoprotein 2                                                                                            | LAMP2                                        | 2 | - | 0.415 |
| 1132 | Q96EK5   | KIF1-binding protein                                                                                                                   | KIAA1279                                     | 2 | - | 0.414 |
| 1133 | Q14566   | DNA replication licensing factor MCM6                                                                                                  | MCM6                                         | 2 | - | 0.412 |
| 1134 | P35754   | Glutaredoxin-1                                                                                                                         | GLRX                                         | 2 | - | 0.41  |
| 1135 | P17096   | High mobility group protein HMG-I/HMG-Y                                                                                                | HMGAI                                        | 2 | - | 0.407 |
| 1136 | P26196   | Probable ATP-dependent RNA helicase DDX6                                                                                               | DDX6                                         | 2 | - | 0.407 |
| 1137 | Q96FN4   | Copine-2;Copine-9;Copine-4;Copine-6;Copine-7;Copine-8; Copine-5                                                                        | CPNE2;CPNE8; CPNE5;CPNE9; CPNE4;CPNE6; CPNE7 | 2 | - | 0.401 |
| 1138 | P20042   | Eukaryotic translation initiation factor 2 subunit 2                                                                                   | EIF2S2                                       | 2 | - | 0.399 |
| 1139 | P61966   | AP-1 complex subunit sigma-1A                                                                                                          | AP1S1                                        | 2 | - | 0.392 |
| 1140 | P62314   | Small nuclear ribonucleoprotein Sm D1                                                                                                  | SNRPD1                                       | 2 | - | 0.391 |
| 1141 | F6RFD5   | Dextrin                                                                                                                                | DSTN                                         | 2 | - | 0.39  |
| 1142 | Q0VDD8   | Dynein heavy chain 14, axonemal                                                                                                        | DNAH14                                       | 2 | + | 0.387 |
| 1143 | P00966   | Argininosuccinate synthase                                                                                                             | ASS1                                         | 2 | - | 0.384 |
| 1144 | Q9NRV9   | Heme-binding protein 1                                                                                                                 | HEBP1                                        | 2 | - | 0.38  |
| 1145 | Q13907   | Isopentenyl-diphosphate Delta-isomerase 1                                                                                              | IDI1                                         | 2 | - | 0.379 |
| 1146 | E7EVH9   | Pseudouridine-5-monophosphatase                                                                                                        | HDHD1                                        | 2 | - | 0.378 |
| 1147 | P16401   | Histone H1.5                                                                                                                           | HIST1H1B                                     | 2 | - | 0.375 |
| 1148 | Q8NDH3-2 | Probable aminopeptidase NPEPL1                                                                                                         | NPEPL1                                       | 2 | - | 0.371 |
| 1149 | P62942   | Peptidyl-prolyl cis-trans isomerase FKBP1A;Peptidyl-prolyl cis-trans isomerase                                                         | FKBP1A; FKBP12-Exp2                          | 2 | - | 0.368 |
| 1150 | C9JFE4   | COP9 signalosome complex subunit 1                                                                                                     | GPS1                                         | 2 | - | 0.367 |
| 1151 | F5GXQ0   | BRO1 domain-containing protein BROX                                                                                                    | BROX;C1orf58                                 | 2 | - | 0.363 |
| 1152 | Q01469   | Fatty acid-binding protein, epidermal                                                                                                  | FABP5                                        | 2 | - | 0.363 |
| 1153 | P45974-2 | Ubiquitin carboxyl-terminal hydrolase 5                                                                                                | USP5                                         | 2 | - | 0.357 |
| 1154 | P50281   | Matrix metalloproteinase-14                                                                                                            | MMP14                                        | 2 | + | 0.351 |

|      |          |                                                                                                                                                                     |             |   |   |       |
|------|----------|---------------------------------------------------------------------------------------------------------------------------------------------------------------------|-------------|---|---|-------|
| 1155 | K7ENG2   | Splicing factor U2AF 65 kDa subunit                                                                                                                                 | U2AF2       | 2 | - | 0.338 |
| 1156 | Q9NZM1-6 | Myoferlin                                                                                                                                                           | MYOF        | 2 | - | 0.337 |
| 1157 | Q08554-2 | Desmocollin-1                                                                                                                                                       | DSC1        | 2 | + | 0.334 |
| 1158 | Q9C0B1   | Alpha-ketoglutarate-dependent dioxygenase FTO                                                                                                                       | FTO         | 2 | - | 0.332 |
| 1159 | O43924   | Retinal rod rhodopsin-sensitive cGMP 3,5-cyclic phosphodiesterase subunit delta                                                                                     | PDE6D       | 2 | - | 0.331 |
| 1160 | P35052   | Glypican-1;Secreted glypican-1                                                                                                                                      | GPC1        | 2 | + | 0.33  |
| 1161 | F5H7E2   | Superkiller viralicidic activity 2-like 2                                                                                                                           | SKIV2L2     | 2 | - | 0.323 |
| 1162 | J3QRJ3   | Thy-1 membrane glycoprotein                                                                                                                                         | THY1        | 2 | + | 0.322 |
| 1163 | B4E363   | Phenylalanine--tRNA ligase alpha subunit                                                                                                                            | FARSA       | 2 | - | 0.32  |
| 1164 | F5H7J9   | Low-density lipoprotein receptor-related protein 6                                                                                                                  | LRP6        | 2 | + | 0.317 |
| 1165 | Q00577   | Transcriptional activator protein Pur-alpha                                                                                                                         | PURA        | 2 | - | 0.313 |
| 1166 | Q9Y3C6   | Peptidyl-prolyl cis-trans isomerase-like 1                                                                                                                          | PPIL1       | 2 | - | 0.309 |
| 1167 | Q9H1E3   | Nuclear ubiquitous casein and cyclin-dependent kinase substrate 1                                                                                                   | NUCKS1      | 2 | - | 0.308 |
| 1168 | Q99471   | Prefoldin subunit 5                                                                                                                                                 | PFDN5       | 2 | - | 0.296 |
| 1169 | O94979-7 | Protein transport protein Sec31A                                                                                                                                    | SEC31A      | 2 | + | 0.293 |
| 1170 | Q92747   | Actin-related protein 2/3 complex subunit 1A                                                                                                                        | ARPC1A      | 2 | - | 0.29  |
| 1171 | H0Y614   | Ubiquitin-fold modifier 1                                                                                                                                           | UFM1        | 2 | - | 0.284 |
| 1172 | Q9ULC4-2 | Malignant T-cell-amplified sequence 1                                                                                                                               | MCTS1       | 2 | - | 0.284 |
| 1173 | H0Y8E6   | DNA replication licensing factor MCM2                                                                                                                               | MCM2        | 2 | - | 0.275 |
| 1174 | P26583   | High mobility group protein B2                                                                                                                                      | HMGB2       | 2 | - | 0.258 |
| 1175 | O00468-2 | Agrin;Agrin N-terminal 110 kDa subunit;Agrin C-terminal 110 kDa subunit;Agrin C-terminal 90 kDa fragment;Agrin C-terminal 22 kDa fragment                           | AGRN        | 2 | + | 0.245 |
| 1176 | J3QLE5   | Small nuclear ribonucleoprotein-associated proteins B and B;Small nuclear ribonucleoprotein-associated protein N;Small nuclear ribonucleoprotein-associated protein | SNRPN;SNRPB | 2 | - | 0.245 |
| 1177 | G5E972   | Lamina-associated polypeptide 2, isoforms beta/gamma;Thymopoietin;Thymopentin;Lamina-associated polypeptide 2, isoform alpha;Thymopoietin;Thymopentin               | TMPO        | 2 | - | 0.244 |
| 1178 | O95292   | Vesicle-associated membrane protein-associated protein B/C                                                                                                          | VAPB        | 2 | - | 0.243 |
| 1179 | Q13263   | Transcription intermediary factor 1-beta                                                                                                                            | TRIM28      | 2 | - | 0.243 |
| 1180 | B5MCE7   | Basic leucine zipper and W2 domain-containing protein 2                                                                                                             | BZW2        | 2 | - | 0.242 |
| 1181 | Q13409-6 | Cytoplasmic dynein 1 intermediate chain 2                                                                                                                           | DYNC1I2     | 2 | - | 0.239 |
| 1182 | Q07955   | Serine/arginine-rich splicing factor 1                                                                                                                              | SRSF1       | 2 | - | 0.233 |
| 1183 | P43146   | Netrin receptor DCC                                                                                                                                                 | DCC         | 2 | + | 0.223 |
| 1184 | P35613-3 | Basigin                                                                                                                                                             | BSG         | 2 | - | 0.217 |
| 1185 | Q9NTZ6   | RNA-binding protein 12                                                                                                                                              | RBM12       | 2 | + | 0.199 |
| 1186 | Q9NRN5-2 | Olfactomedin-like protein 3                                                                                                                                         | OLFML3      | 2 | - | 0.171 |

|      |          |                                                                   |                      |   |   |       |
|------|----------|-------------------------------------------------------------------|----------------------|---|---|-------|
| 1187 | O14672   | Disintegrin and metalloproteinase domain-containing protein 10    | ADAM10               | 2 | + | 0.158 |
| 1188 | O43155   | Leucine-rich repeat transmembrane protein FLRT2                   | FLRT2                | 2 | + | 0.147 |
| 1189 | Q9UH65   | Switch-associated protein 70                                      | SWAP70               | 2 | - | 0.13  |
| 1190 | Q92692-2 | Poliovirus receptor-related protein 2                             | PVRL2                | 2 | + | 0.115 |
| 1191 | O00571-2 | ATP-dependent RNA helicase DDX3X;ATP-dependent RNA helicase DDX3Y | DDX3X;DDX3Y          | 2 | - | 0.108 |
| 1192 | Q08945   | FACT complex subunit SSRP1                                        | SSRP1                | 2 | - | 0.097 |
| 1193 | P31942-3 | Heterogeneous nuclear ribonucleoprotein H3                        | HNRNPH3              | 2 | - | 0.096 |
| 1194 | Q92945   | Far upstream element-binding protein 2                            | KHSRP                | 2 | - | 0.091 |
| 1195 | O43670-2 | Zinc finger protein 207                                           | ZNF207               | 2 | - | 0.088 |
| 1196 | Q15843   | NEDD8                                                             | NEDD8;<br>NEDD8-MDP1 | 2 | - | 0.031 |

<sup>a</sup> UniProt Accession number (corresponds to the leading protein).

<sup>b</sup> Protein names are those from the UniProt database.

<sup>c</sup> The total number of peptides identified by mass spectrometry.

<sup>d</sup> The presence of signal peptides in the identified protein sequences was predicted by the SignalP (v. 4.1,<http://www.cbs.dtu.dk/services/SignalP/>) algorithm.

<sup>e</sup> The NN-score corresponds to the score provided by the SecretomeP 2.0 web server (<http://www.cbs.dtu.dk/services/SecretomeP/>). For proteins without signal peptide, a score higher than 0.5 indicates a high probability of secretion via a non-classical secretion mechanism.

[NA: non-applicable due to exceeded sequence limit].



**Supplementary table ST3:** List of MCSF-regulated proteins identified in CHME-3 supernatant.

| S.No | SILAC data <sup>#</sup> |                                                                          |                       |                              |                             |                       | TCGA data <sup>%</sup> |                   |          |            |
|------|-------------------------|--------------------------------------------------------------------------|-----------------------|------------------------------|-----------------------------|-----------------------|------------------------|-------------------|----------|------------|
|      | Protein AC <sup>a</sup> | Protein names <sup>b</sup>                                               | Peptides <sup>c</sup> | Log 2 H/M Ratio <sup>d</sup> | Signal peptide <sup>e</sup> | NN-score <sup>f</sup> | Gene symbol            | Log 2 fold change | p value  | Regulation |
| 1    | Q15782                  | Chitinase-3-like protein 2                                               | 11                    | -1.180                       | -                           | 0.490                 | CHI3L2                 | 3.83              | 0.000003 | Up         |
| 2    | P24821                  | Tenascin                                                                 | 65                    | -0.981                       | +                           | 0.468                 | TNC                    | 3.02              | 0.000002 | Up         |
| 3    | P04083                  | Annexin A1                                                               | 7                     | -1.595                       | -                           | 0.511                 | ANXA1                  | 2.68              | 0.000003 | Up         |
| 4    | P15692                  | Vascular endothelial growth factor A                                     | 2                     | -1.998                       | +                           | 0.878                 | VEGFA                  | 2.67              | 0.000004 | Up         |
| 5    | P00749                  | Urokinase-type plasminogen activator                                     | 5                     | 0.953                        | +                           | 0.634                 | PLAU                   | 2.60              | 0.000002 | Up         |
| 6    | P08758                  | Annexin A5                                                               | 14                    | -1.700                       | -                           | 0.550                 | ANXA5                  | 2.17              | 0.000002 | Up         |
| 7    | P07355                  | Annexin A2                                                               | 16                    | -1.489                       | -                           | 0.746                 | ANXA2                  | 2.16              | 0.000003 | Up         |
| 8    | P36222                  | Chitinase-3-like protein 1                                               | 17                    | -1.029                       | +                           | 0.645                 | CHI3L1                 | 2.01              | 0.000022 | Up         |
| 9    | P30481                  | HLA class I histocompatibility antigen, B-44 alpha chain                 | 5                     | 1.175                        | +                           | 0.270                 | HLA-B                  | 1.84              | 0.000004 | Up         |
| 10   | P34096                  | Ribonuclease 4                                                           | 2                     | 1.190                        | +                           | 0.919                 | RNASE4                 | 1.54              | 0.000014 | Up         |
| 11   | P51884                  | Lumican                                                                  | 9                     | -1.094                       | +                           | 0.543                 | LUM                    | 1.54              | 0.000021 | Up         |
| 12   | Q7Z4H8                  | KDEL motif-containing protein 2                                          | 6                     | 0.905                        | +                           | 0.709                 | KDELC2                 | 1.40              | 0.000002 | Up         |
| 13   | Q96PD2                  | Discoidin, CUB and LCCL domain-containing protein 2                      | 3                     | 0.960                        | -                           | 0.347                 | DCBLD2                 | 1.33              | 0.000003 | Up         |
| 14   | Q6YHK3                  | CD109 antigen                                                            | 15                    | 1.039                        | +                           | 0.600                 | CD109                  | 1.27              | 0.000027 | Up         |
| 15   | Q14766                  | Latent-transforming growth factor beta-binding protein 1                 | 10                    | -2.006                       | +                           | 0.531                 | LTBP1                  | 1.15              | 0.000771 | Up         |
| 16   | Q969H8                  | UPF0556 protein C19orf10                                                 | 5                     | 0.936                        | +                           | 0.906                 | C19orf10               | 1.15              | 0.000004 | Up         |
| 17   | P68431                  | Histone H3.1                                                             | 3                     | -1.167                       | -                           | 0.718                 | HIST1H3A               | 1.11              | 0.000002 | Up         |
| 18   | P05161                  | Ubiquitin-like protein ISG15                                             | 4                     | 0.594                        | -                           | 0.702                 | ISG15                  | 1.10              | 0.001285 | Up         |
| 19   | A5A3E0                  | POTE ankyrin domain family member F                                      | 7                     | -1.986                       | -                           | 0.364                 | POTEF                  | 1.05              | 0.000005 | Up         |
| 20   | Q15691                  | Microtubule-associated protein RP/EB family member 1                     | 4                     | -1.001                       | -                           | 0.356                 | MAPRE1                 | 1.04              | 0.000002 | Up         |
| 21   | Q9NRN5                  | Olfactomedin-like protein 3                                              | 2                     | 0.916                        | -                           | 0.171                 | OLFML3                 | 1.01              | 0.000082 | Up         |
| 22   | P04843                  | Dolichyl-diphosphooligosaccharide--protein glycosyltransferase subunit 1 | 3                     | -2.784                       | +                           | 0.151                 | RPN1                   | 0.96              | 0.000003 | Up         |
| 23   | Q71UI9                  | Histone H2A.V                                                            | 4                     | -1.659                       | -                           | 0.593                 | H2AFV                  | 0.88              | 0.000005 | Up         |

|    |        |                                                                               |    |        |   |       |          |       |          |      |
|----|--------|-------------------------------------------------------------------------------|----|--------|---|-------|----------|-------|----------|------|
| 24 | P62249 | 40S ribosomal protein S16                                                     | 6  | -1.559 | - | 0.735 | RPS16    | 0.87  | 0.000039 | Up   |
| 25 | P39656 | Dolichyl-diphosphooligosaccharide--protein glycosyltransferase 48 kDa subunit | 4  | -2.781 | + | 0.783 | DDOST    | 0.87  | 0.000002 | Up   |
| 26 | O14672 | Disintegrin and metalloproteinase domain-containing protein 10                | 2  | 0.911  | + | 0.158 | ADAM10   | 0.79  | 0.000045 | Up   |
| 27 | P08865 | 40S ribosomal protein SA                                                      | 8  | -1.009 | - | 0.428 | RPSA     | 0.78  | 0.000018 | Up   |
| 28 | P62244 | 40S ribosomal protein S15a                                                    | 4  | -1.315 | - | 0.663 | RPS15A   | 0.73  | 0.000294 | Up   |
| 29 | P46776 | 60S ribosomal protein L27a                                                    | 2  | -1.919 | - | 0.736 | RPL27A   | 0.68  | 0.000054 | Up   |
| 30 | P62241 | 40S ribosomal protein S8                                                      | 2  | -1.760 | - | 0.419 | RPS8     | 0.65  | 0.000076 | Up   |
| 31 | P62269 | 40S ribosomal protein S18                                                     | 4  | -1.635 | - | 0.459 | RPS18    | 0.59  | 0.003552 | Up   |
| 32 | P08195 | 4F2 cell-surface antigen heavy chain                                          | 13 | -1.169 | - | 0.451 | SLC3A2   | 0.59  | 0.000507 | Up   |
| 33 | P21796 | Voltage-dependent anion-selective channel protein 1                           | 3  | -2.012 | - | 0.375 | VDAC1    | -0.58 | 0.000025 | Down |
| 34 | Q9Y2A7 | Nck-associated protein 1                                                      | 2  | -2.828 | - | 0.529 | NCKAP1   | -0.60 | 0.000095 | Down |
| 35 | P25705 | ATP synthase subunit alpha, mitochondrial                                     | 10 | -1.083 | - | 0.574 | ATP5A1   | -0.69 | 0.000031 | Down |
| 36 | O94856 | Neurofascin                                                                   | 9  | 3.022  | + | 0.381 | NFASC    | -0.76 | 0.002019 | Down |
| 37 | Q86Y38 | Xylosyltransferase 1                                                          | 15 | 2.093  | + | 0.381 | XYLT1    | -0.90 | 0.000026 | Down |
| 38 | Q9UM22 | Mammalian ependymin-related protein 1                                         | 3  | 5.018  | - | 0.735 | EPDR1    | -1.05 | 0.000019 | Down |
| 39 | P02787 | Serotransferrin                                                               | 3  | 2.625  | + | 0.478 | TF       | -1.51 | 0.000221 | Down |
| 40 | Q8N474 | Secreted frizzled-related protein 1                                           | 4  | 0.622  | + | 0.692 | SFRP1    | -1.81 | 0.000217 | Down |
| 41 | Q08209 | Serine/threonine-protein phosphatase 2B catalytic subunit alpha isoform       | 2  | 1.446  | - | 0.588 | PPP3CA   | -1.93 | 0.000002 | Down |
| 42 | O43155 | Leucine-rich repeat transmembrane protein FLRT2                               | 2  | 2.893  | + | 0.147 | FLRT2    | -2.31 | 0.000002 | Down |
| 43 | Q8WVQ1 | Soluble calcium-activated nucleotidase 1                                      | 9  | 2.230  | - | 0.470 | CANT1    | 0.56  | 0.000029 | Up   |
| 44 | Q92896 | Golgi apparatus protein 1                                                     | 3  | 1.459  | + | 0.289 | GLG1     | 0.55  | 0.002142 | Up   |
| 45 | P16278 | Beta-galactosidase                                                            | 2  | 1.358  | + | 0.711 | GLB1     | 0.52  | 0.000183 | Up   |
| 46 | P43251 | Biotinidase                                                                   | 4  | -1.132 | + | 0.753 | BTD      | 0.47  | 0.003677 | Up   |
| 47 | P23396 | 40S ribosomal protein S3                                                      | 10 | -1.130 | - | 0.490 | RPS3     | 0.47  | 0.002786 | Up   |
| 48 | P62917 | 60S ribosomal protein L8                                                      | 2  | -2.009 | - | 0.449 | RPL8     | 0.41  | 0.000688 | Up   |
| 49 | P61353 | 60S ribosomal protein L27                                                     | 4  | -2.040 | - | 0.612 | RPL27    | 0.41  | 0.028074 | Up   |
| 50 | Q99623 | Prohibitin-2                                                                  | 4  | -2.921 | - | 0.686 | PHB2     | 0.33  | 0.001947 | Up   |
| 51 | Q9Y2E5 | Epididymis-specific alpha-mannosidase                                         | 2  | -4.172 | + | 0.699 | MAN2B2   | -0.33 | 0.027688 | Down |
| 52 | Q9Y646 | Carboxypeptidase Q                                                            | 3  | 0.910  | + | 0.646 | CPQ      | 0.52  | 0.002487 | Up   |
| 53 | P18124 | 60S ribosomal protein L7                                                      | 4  | -2.034 | - | 0.256 | RPL7     | 0.52  | 0.000943 | Up   |
| 54 | Q9BY76 | Angiopoietin-related protein 4                                                | 2  | 0.937  | - | 0.581 | ANGPTL4  | 0.70  | 0.079775 | NS   |
| 55 | P08833 | Insulin-like growth factor-binding protein 1                                  | 5  | -1.266 | + | 0.818 | IGFBP1   | 0.42  | 0.095833 | NS   |
| 56 | P62805 | Histone H4                                                                    | 6  | -2.054 | - | 0.408 | HIST1H4A | 0.18  | 0.106466 | NS   |

|    |        |                                                         |    |        |   |       |           |       |          |    |
|----|--------|---------------------------------------------------------|----|--------|---|-------|-----------|-------|----------|----|
| 57 | Q9UNW1 | Multiple inositol polyphosphate phosphatase 1           | 5  | 0.911  | + | 0.684 | MINPP1    | 0.24  | 0.211119 | NS |
| 58 | Q9H1B5 | Xylosyltransferase 2                                    | 4  | 2.840  | + | 0.431 | XYLT2     | 0.14  | 0.286811 | NS |
| 59 | P08133 | Annexin A6                                              | 14 | -1.369 | - | 0.334 | ANXA6     | -0.14 | 0.388618 | NS |
| 60 | P26373 | 60S ribosomal protein L13                               | 3  | -1.748 | - | 0.335 | RPL13     | 0.04  | 0.709822 | NS |
| 61 | P05141 | ADP/ATP translocase 2                                   | 8  | -3.484 | - | 0.030 | SLC25A5   | -0.03 | 0.881773 | NS |
| 62 | O75581 | Low-density lipoprotein receptor-related protein 6      | 2  | 1.610  | + | 0.317 | LRP6      | 0.06  | 0.898951 | NS |
| 63 | Q15056 | Eukaryotic translation initiation factor 4H             | 2  | 1.127  | - | 0.794 | EIF4H     | -0.03 | 0.925126 | NS |
| 64 | Q02413 | Desmoglein-1                                            | 2  | 1.914  | + | 0.556 | DSG1      | -0.06 | 0.990762 | NS |
| 65 | Q8IXL6 | Extracellular serine/threonine protein kinase<br>FAM20C | 2  | 1.380  | - | 0.536 | FAM20C    | NA    | NA       | NA |
| 66 | Q6DD88 | Atlastin-3                                              | 2  | -1.814 | - | 0.735 | ATL3      | NA    | NA       | NA |
| 67 | P62807 | Histone H2B type 1-C/E/F/G/I                            | 3  | -1.512 | - | 0.322 | HIST1H2BC | NA    | NA       | NA |

<sup>#</sup>SILAC experiment was conducted using supernatant from CHME-3 cells treated with U87 CM derived from either control cells or MCSF silenced cells to identify MCSF-regulated proteins.

<sup>a</sup> UniProt Accession number (corresponds to the leading protein).

<sup>b</sup> Protein names are those from the UniProt database.

<sup>c</sup> The total number of peptides identified by mass spectrometry.

<sup>d</sup> The logarithmic of ratio between CHME-3 treated with siMCSF U87 CM (Heavy label) to CHME-3 treated with siNT U87 CM (Medium label).

<sup>e</sup> The presence of signal peptides in the identified protein sequences was predicted by the SignalP (v. 4.1, <http://www.cbs.dtu.dk/services/SignalP/>) algorithm.

<sup>f</sup> The NN-score corresponds to the score provided by the SecretomeP 2.0 web server (<http://www.cbs.dtu.dk/services/SecretomeP/>). For proteins without signal peptide, a score higher than 0.5 indicates a high probability of secretion via a non-classical secretion mechanism.

<sup>%</sup>The TCGA microarray data which is publically available was used to check the transcript levels of 67 differentially regulated proteins obtained by SILAC experiment. Non-parametric t-test was conducted with FDR correction using expression of normal brain tissue and GBM tumor tissue to identify significant differentially regulated proteins at transcript levels. The regulation, p value and log 2 fold change are provided in the table.

Note: 'NA' refers to 'not applicable' and 'NS' refers to not significant.

**Supplementary table ST4:** BINGO analysis using MCSF-regulated genes.

| <b>Output of cellular component ontology.</b> |                         |                                      |          |          |          |          |
|-----------------------------------------------|-------------------------|--------------------------------------|----------|----------|----------|----------|
| <b>S. No</b>                                  | <b>Adjusted P Value</b> | <b>Description</b>                   | <b>N</b> | <b>n</b> | <b>X</b> | <b>x</b> |
| 1                                             | 0.00000005417           | extracellular region                 | 16373    | 2025     | 57       | 26       |
| 2                                             | 0.00000005417           | extracellular region part            | 16373    | 985      | 57       | 19       |
| 3                                             | 0.00000019693           | extracellular space                  | 16373    | 747      | 57       | 16       |
| 4                                             | 0.00000101520           | extracellular matrix                 | 16373    | 340      | 57       | 11       |
| 5                                             | 0.00004663200           | proteinaceous extracellular matrix   | 16373    | 312      | 57       | 9        |
| 6                                             | 0.00046729000           | melanosome                           | 16373    | 92       | 57       | 5        |
| 7                                             | 0.00046729000           | pigment granule                      | 16373    | 92       | 57       | 5        |
| 8                                             | 0.00101340000           | extracellular matrix part            | 16373    | 111      | 57       | 5        |
| 9                                             | 0.00166150000           | nucleosome                           | 16373    | 65       | 57       | 4        |
| 10                                            | 0.00235480000           | basement membrane                    | 16373    | 73       | 57       | 4        |
| 11                                            | 0.00640540000           | protein-DNA complex                  | 16373    | 97       | 57       | 4        |
| 12                                            | 0.00689280000           | oligosaccharyltransferase complex    | 16373    | 9        | 57       | 2        |
| 13                                            | 0.00835080000           | cytoplasmic vesicle                  | 16373    | 685      | 57       | 9        |
| 14                                            | 0.01044000000           | vesicle                              | 16373    | 714      | 57       | 9        |
| 15                                            | 0.01491700000           | cell surface                         | 16373    | 340      | 57       | 6        |
| 16                                            | 0.01992500000           | cytoplasmic part                     | 16373    | 5149     | 57       | 29       |
| 17                                            | 0.01992500000           | cytoplasmic membrane-bounded vesicle | 16373    | 647      | 57       | 8        |
| 18                                            | 0.02199700000           | membrane-bounded vesicle             | 16373    | 665      | 57       | 8        |
| 19                                            | 0.02351300000           | endoplasmic reticulum part           | 16373    | 678      | 57       | 8        |
| 20                                            | 0.03047200000           | subs synaptic reticulum              | 16373    | 713      | 57       | 8        |
| 21                                            | 0.04356000000           | perinuclear region of cytoplasm      | 16373    | 324      | 57       | 5        |
| 22                                            | 0.04356000000           | chromatin                            | 16373    | 202      | 57       | 4        |
| 23                                            | 0.04356000000           | nucleoid                             | 16373    | 31       | 57       | 2        |
| 24                                            | 0.04356000000           | mitochondrial nucleoid               | 16373    | 31       | 57       | 2        |
| <b>Output of biological process ontology.</b> |                         |                                      |          |          |          |          |
| <b>S. No</b>                                  | <b>Adjusted P Value</b> | <b>Description</b>                   | <b>N</b> | <b>n</b> | <b>X</b> | <b>x</b> |
| 1                                             | 0.0108340               | regulation of vesicle fusion         | 14301    | 5        | 52       | 2        |
| 2                                             | 0.0108340               | negative regulation of coagulation   | 14301    | 26       | 52       | 3        |
| 3                                             | 0.0108340               | regulation of coagulation            | 14301    | 43       | 52       | 4        |

|    |           |                                                          |       |      |    |    |
|----|-----------|----------------------------------------------------------|-------|------|----|----|
| 4  | 0.0108340 | regulation of response to external stimulus              | 14301 | 191  | 52 | 6  |
| 5  | 0.0108340 | regulation of morphogenesis of a branching structure     | 14301 | 28   | 52 | 3  |
| 6  | 0.0108340 | wound healing                                            | 14301 | 199  | 52 | 6  |
| 7  | 0.0108340 | blood coagulation, extrinsic pathway                     | 14301 | 5    | 52 | 2  |
| 8  | 0.0108340 | aminoglycan metabolic process                            | 14301 | 67   | 52 | 4  |
| 9  | 0.0108340 | regulation of multicellular organismal process           | 14301 | 1067 | 52 | 13 |
| 10 | 0.0108340 | positive regulation of vesicle fusion                    | 14301 | 4    | 52 | 2  |
| 11 | 0.0108340 | carbohydrate metabolic process                           | 14301 | 522  | 52 | 9  |
| 12 | 0.0108340 | regulation of endothelial cell proliferation             | 14301 | 47   | 52 | 4  |
| 13 | 0.0108340 | negative regulation of biological process                | 14301 | 2020 | 52 | 19 |
| 14 | 0.0120640 | negative regulation of cellular process                  | 14301 | 1844 | 52 | 17 |
| 15 | 0.0120640 | regulation of body fluid levels                          | 14301 | 146  | 52 | 5  |
| 16 | 0.0120640 | gland morphogenesis                                      | 14301 | 79   | 52 | 4  |
| 17 | 0.0121690 | positive regulation of endothelial cell proliferation    | 14301 | 32   | 52 | 3  |
| 18 | 0.0121690 | chitin metabolic process                                 | 14301 | 7    | 52 | 2  |
| 19 | 0.0121690 | regulation of biological quality                         | 14301 | 1541 | 52 | 15 |
| 20 | 0.0121690 | fibrinolysis                                             | 14301 | 7    | 52 | 2  |
| 21 | 0.0121690 | nucleosome assembly                                      | 14301 | 83   | 52 | 4  |
| 22 | 0.0121690 | chitin catabolic process                                 | 14301 | 7    | 52 | 2  |
| 23 | 0.0121690 | chromatin assembly                                       | 14301 | 87   | 52 | 4  |
| 24 | 0.0131510 | tissue development                                       | 14301 | 749  | 52 | 10 |
| 25 | 0.0138670 | protein-DNA complex assembly                             | 14301 | 92   | 52 | 4  |
| 26 | 0.0138960 | nucleosome organization                                  | 14301 | 93   | 52 | 4  |
| 27 | 0.0141470 | regulation of blood coagulation                          | 14301 | 39   | 52 | 3  |
| 28 | 0.0158310 | positive regulation of chemotaxis                        | 14301 | 41   | 52 | 3  |
| 29 | 0.0166450 | blood coagulation                                        | 14301 | 103  | 52 | 4  |
| 30 | 0.0166450 | positive regulation of angiogenesis                      | 14301 | 43   | 52 | 3  |
| 31 | 0.0166450 | coagulation                                              | 14301 | 103  | 52 | 4  |
| 32 | 0.0166450 | regulation of wound healing                              | 14301 | 43   | 52 | 3  |
| 33 | 0.0170320 | protein amino acid N-linked glycosylation via asparagine | 14301 | 10   | 52 | 2  |

|    |           |                                                                              |       |      |    |    |
|----|-----------|------------------------------------------------------------------------------|-------|------|----|----|
| 34 | 0.0170320 | peptidyl-asparagine modification                                             | 14301 | 10   | 52 | 2  |
| 35 | 0.0180470 | hemostasis                                                                   | 14301 | 109  | 52 | 4  |
| 36 | 0.0180470 | positive regulation of behavior                                              | 14301 | 47   | 52 | 3  |
| 37 | 0.0180470 | gland development                                                            | 14301 | 193  | 52 | 5  |
| 38 | 0.0183620 | response to wounding                                                         | 14301 | 541  | 52 | 8  |
| 39 | 0.0190390 | regulation of anatomical structure morphogenesis                             | 14301 | 301  | 52 | 6  |
| 40 | 0.0190390 | polysaccharide metabolic process                                             | 14301 | 114  | 52 | 4  |
| 41 | 0.0190390 | anti-apoptosis                                                               | 14301 | 199  | 52 | 5  |
| 42 | 0.0196290 | regulation of chemotaxis                                                     | 14301 | 51   | 52 | 3  |
| 43 | 0.0196290 | regulation of cell proliferation                                             | 14301 | 848  | 52 | 10 |
| 44 | 0.0201860 | DNA packaging                                                                | 14301 | 118  | 52 | 4  |
| 45 | 0.0221500 | mammary gland alveolus development                                           | 14301 | 13   | 52 | 2  |
| 46 | 0.0248450 | anatomical structure morphogenesis                                           | 14301 | 1217 | 52 | 12 |
| 47 | 0.0248450 | chromatin assembly or disassembly                                            | 14301 | 127  | 52 | 4  |
| 48 | 0.0339500 | DNA conformation change                                                      | 14301 | 139  | 52 | 4  |
| 49 | 0.0413890 | regulation of behavior                                                       | 14301 | 69   | 52 | 3  |
| 50 | 0.0417890 | developmental process                                                        | 14301 | 3233 | 52 | 21 |
| 51 | 0.0417890 | positive regulation of leukocyte chemotaxis                                  | 14301 | 23   | 52 | 2  |
| 52 | 0.0417890 | branched-chain aliphatic amino acid transport                                | 14301 | 1    | 52 | 1  |
| 53 | 0.0417890 | macromolecular complex assembly                                              | 14301 | 676  | 52 | 8  |
| 54 | 0.0417890 | negative regulation of blood coagulation                                     | 14301 | 24   | 52 | 2  |
| 55 | 0.0417890 | glycosaminoglycan biosynthetic process                                       | 14301 | 23   | 52 | 2  |
| 56 | 0.0417890 | aminoglycan catabolic process                                                | 14301 | 21   | 52 | 2  |
| 57 | 0.0417890 | primitive erythrocyte differentiation                                        | 14301 | 1    | 52 | 1  |
| 58 | 0.0417890 | regulation of muscle filament sliding speed                                  | 14301 | 1    | 52 | 1  |
| 59 | 0.0417890 | prostate gland epithelium morphogenesis                                      | 14301 | 24   | 52 | 2  |
| 60 | 0.0417890 | mesenchymal-epithelial cell signaling involved in prostate gland development | 14301 | 1    | 52 | 1  |
| 61 | 0.0417890 | tissue morphogenesis                                                         | 14301 | 274  | 52 | 5  |
| 62 | 0.0417890 | constitutive protein ectodomain proteolysis                                  | 14301 | 1    | 52 | 1  |
| 63 | 0.0417890 | negative regulation of programmed cell death                                 | 14301 | 381  | 52 | 6  |
| 64 | 0.0417890 | female sex differentiation                                                   | 14301 | 83   | 52 | 3  |

|    |           |                                                              |       |      |    |    |
|----|-----------|--------------------------------------------------------------|-------|------|----|----|
| 65 | 0.0417890 | multicellular organismal development                         | 14301 | 2970 | 52 | 20 |
| 66 | 0.0417890 | angiogenesis                                                 | 14301 | 152  | 52 | 4  |
| 67 | 0.0417890 | activation of blood coagulation via clotting cascade         | 14301 | 1    | 52 | 1  |
| 68 | 0.0417890 | reproductive structure development                           | 14301 | 163  | 52 | 4  |
| 69 | 0.0417890 | leucine transport                                            | 14301 | 1    | 52 | 1  |
| 70 | 0.0417890 | regulation of smooth muscle cell migration                   | 14301 | 20   | 52 | 2  |
| 71 | 0.0417890 | basophil chemotaxis                                          | 14301 | 1    | 52 | 1  |
| 72 | 0.0417890 | negative regulation of multicellular organismal process      | 14301 | 174  | 52 | 4  |
| 73 | 0.0417890 | tryptophan transport                                         | 14301 | 1    | 52 | 1  |
| 74 | 0.0417890 | anatomical structure formation involved in morphogenesis     | 14301 | 375  | 52 | 6  |
| 75 | 0.0417890 | regulation of positive chemotaxis                            | 14301 | 22   | 52 | 2  |
| 76 | 0.0417890 | Wnt receptor signaling pathway, planar cell polarity pathway | 14301 | 1    | 52 | 1  |
| 77 | 0.0417890 | response to stress                                           | 14301 | 1773 | 52 | 14 |
| 78 | 0.0417890 | leucine import                                               | 14301 | 1    | 52 | 1  |
| 79 | 0.0417890 | positive regulation of positive chemotaxis                   | 14301 | 21   | 52 | 2  |
| 80 | 0.0417890 | negative regulation of cell death                            | 14301 | 389  | 52 | 6  |
| 81 | 0.0417890 | extracellular structure organization                         | 14301 | 160  | 52 | 4  |
| 82 | 0.0417890 | response to hypoxia                                          | 14301 | 149  | 52 | 4  |
| 83 | 0.0417890 | response to oxygen levels                                    | 14301 | 158  | 52 | 4  |
| 84 | 0.0417890 | negative regulation of apoptosis                             | 14301 | 376  | 52 | 6  |
| 85 | 0.0417890 | protein localization to microtubule                          | 14301 | 1    | 52 | 1  |
| 86 | 0.0417890 | polyphosphate metabolic process                              | 14301 | 1    | 52 | 1  |
| 87 | 0.0417890 | primitive hemopoiesis                                        | 14301 | 1    | 52 | 1  |
| 88 | 0.0417890 | regulation of establishment of planar polarity               | 14301 | 1    | 52 | 1  |
| 89 | 0.0418890 | aminoglycan biosynthetic process                             | 14301 | 25   | 52 | 2  |
| 90 | 0.0430640 | regulation of angiogenesis                                   | 14301 | 87   | 52 | 3  |
| 91 | 0.0430640 | positive regulation of response to external stimulus         | 14301 | 87   | 52 | 3  |
| 92 | 0.0437980 | prostate gland morphogenesis                                 | 14301 | 26   | 52 | 2  |

| <b>Output of molecular function ontology.</b> |                         |                                      |          |          |          |          |
|-----------------------------------------------|-------------------------|--------------------------------------|----------|----------|----------|----------|
| <b>S. No</b>                                  | <b>Adjusted P Value</b> | <b>Description</b>                   | <b>N</b> | <b>n</b> | <b>X</b> | <b>x</b> |
| 1                                             | 0.000000054             | extracellular region                 | 16373    | 2025     | 57       | 26       |
| 2                                             | 0.000000054             | extracellular region part            | 16373    | 985      | 57       | 19       |
| 3                                             | 0.000000197             | extracellular space                  | 16373    | 747      | 57       | 16       |
| 4                                             | 0.000001015             | extracellular matrix                 | 16373    | 340      | 57       | 11       |
| 5                                             | 0.000046632             | proteinaceous extracellular matrix   | 16373    | 312      | 57       | 9        |
| 6                                             | 0.000467290             | melanosome                           | 16373    | 92       | 57       | 5        |
| 7                                             | 0.000467290             | pigment granule                      | 16373    | 92       | 57       | 5        |
| 8                                             | 0.001013400             | extracellular matrix part            | 16373    | 111      | 57       | 5        |
| 9                                             | 0.001661500             | nucleosome                           | 16373    | 65       | 57       | 4        |
| 10                                            | 0.002354800             | basement membrane                    | 16373    | 73       | 57       | 4        |
| 11                                            | 0.006405400             | protein-DNA complex                  | 16373    | 97       | 57       | 4        |
| 12                                            | 0.006892800             | oligosaccharyltransferase complex    | 16373    | 9        | 57       | 2        |
| 13                                            | 0.008350800             | cytoplasmic vesicle                  | 16373    | 685      | 57       | 9        |
| 14                                            | 0.010440000             | vesicle                              | 16373    | 714      | 57       | 9        |
| 15                                            | 0.014917000             | cell surface                         | 16373    | 340      | 57       | 6        |
| 16                                            | 0.019925000             | cytoplasmic part                     | 16373    | 5149     | 57       | 29       |
| 17                                            | 0.019925000             | cytoplasmic membrane-bounded vesicle | 16373    | 647      | 57       | 8        |
| 18                                            | 0.021997000             | membrane-bounded vesicle             | 16373    | 665      | 57       | 8        |
| 19                                            | 0.023513000             | endoplasmic reticulum part           | 16373    | 678      | 57       | 8        |
| 20                                            | 0.030472000             | subsynaptic reticulum                | 16373    | 713      | 57       | 8        |
| 21                                            | 0.043560000             | perinuclear region of cytoplasm      | 16373    | 324      | 57       | 5        |
| 22                                            | 0.043560000             | chromatin                            | 16373    | 202      | 57       | 4        |
| 23                                            | 0.043560000             | nucleoid                             | 16373    | 31       | 57       | 2        |
| 24                                            | 0.043560000             | mitochondrial nucleoid               | 16373    | 31       | 57       | 2        |

N: the total number of genes in the reference set.

n: the number of genes in the reference set (graph or annotation) annotated to a certain GO class.

X: the total number of genes in the cluster.

x: the number of genes in the cluster annotated to a certain GO class.



**Supplementary table ST5:** The expression of various integrin molecules in GBM using TCGA dataset.

| S. No                        | Gene Symbol | Gene Name                                                                                    | Adujusted p vaule | Log2 Fold Change <sup>a</sup> | Regulation <sup>b</sup> |
|------------------------------|-------------|----------------------------------------------------------------------------------------------|-------------------|-------------------------------|-------------------------|
| <b>Integrin alpha family</b> |             |                                                                                              |                   |                               |                         |
| 1                            | ITGA4       | Integrin, alpha 4 (antigen CD49D, alpha 4 subunit of VLA-4 receptor)                         | 0.000002          | 2.342                         | Up                      |
| 2                            | ITGA1       | Integrin, alpha 1                                                                            | 0.000003          | 2.269                         | Up                      |
| 3                            | ITGA7       | Integrin, alpha 7                                                                            | 0.000024          | 1.621                         | Up                      |
| 4                            | ITGAV       | Integrin, alpha V                                                                            | 0.000008          | 1.511                         | Up                      |
| 5                            | ITGA2       | Integrin, alpha 2 (CD49B, alpha 2 subunit of VLA-2 receptor)                                 | 0.000033          | 1.292                         | Up                      |
| 6                            | ITFG3       | Integrin alpha FG-GAP repeat containing 3                                                    | 0.000004          | 0.989                         | Up                      |
| 7                            | ITGA5       | Integrin, alpha 5 (fibronectin receptor, alpha polypeptide)                                  | 0.000021          | 0.941                         | Up                      |
| 8                            | ITGA6       | Integrin, alpha 6                                                                            | 0.000447          | 0.828                         | Up                      |
| 9                            | ITGA3       | Integrin, alpha 3 (antigen CD49C, alpha 3 subunit of VLA-3 receptor)                         | 0.014000          | 0.724                         | Up                      |
| 10                           | ITGA10      | Integrin, alpha 10                                                                           | 0.000012          | 0.618                         | Up                      |
| 11                           | ITGAX       | Integrin, alpha X (complement component 3 receptor 4 subunit)                                | 0.001000          | 0.578                         | Up                      |
| 12                           | ITFG1       | Integrin alpha FG-GAP repeat containing 1                                                    | 0.000003          | -0.918                        | Down                    |
| <b>Integrin beta family</b>  |             |                                                                                              |                   |                               |                         |
| 1                            | ITGB2       | Integrin, beta 2 (complement component 3 receptor 3 and 4 subunit)                           | 0.000010          | 1.542                         | Up                      |
| 2                            | ITGB4       | Integrin, beta 4                                                                             | 0.000057          | 1.431                         | Up                      |
| 3                            | ITGB1       | Integrin, beta 1 (fibronectin receptor, beta polypeptide, antigen CD29 includes MDF2, MSK12) | 0.000002          | 1.278                         | Up                      |

|                                     |         |                                                             |          |        |      |
|-------------------------------------|---------|-------------------------------------------------------------|----------|--------|------|
| 4                                   | ITGB8   | Integrin, beta 8                                            | 0.000011 | 1.203  | Up   |
| 5                                   | ITGB3   | Integrin, beta 3 (platelet glycoprotein IIIa, antigen CD61) | 0.000029 | 1.078  | Up   |
| 6                                   | ITGBL1  | Integrin, beta-like 1 (with EGF-like repeat domains)        | 0.013000 | 1.073  | Up   |
| 7                                   | ITGB5   | Integrin, beta 5                                            | 0.000461 | 0.820  | Up   |
| 8                                   | ITGB7   | Integrin, beta 7                                            | 0.002000 | -0.658 | Down |
| <b>Integrin-associated proteins</b> |         |                                                             |          |        |      |
| 1                                   | IBSP    | Integrin-binding sialoprotein                               | 0.000033 | 2.513  | Up   |
| 2                                   | ITGB3BP | Integrin beta 3 binding protein (beta3-endonexin)           | 0.000027 | 1.460  | Up   |
| 3                                   | ILK     | Integrin-linked kinase                                      | 0.000087 | 0.780  | Up   |
| 4                                   | EDIL3   | EGF-like repeats and discoidin I-like domains 3             | 0.000003 | -3.244 | Down |

<sup>a</sup>Log 2 fold change is calculated by subtracting mean of normal differential log 2 ratio from mean of GBM differential log 2 ratio.

<sup>b</sup>"Up" and "Down" refers to up-regulation and down-regulation in GBM tumor tissue compared to normal brain tissue respectively. We applied  $>\pm 0.57$  log 2 fold change as the cut-off to identify differentially regulated genes.
